# Supplementary material for: An asymmetric Mannich reaction of α-diazocarbonyl compounds and N-sulfonyl cyclic ketimines catalyzed by complexes generated from chiral and achiral phosphines with gold(i)
Source: Royal Society of Chemistry journal article supplement (doi:10.1039/c8ob00577j), 2018-01-01

# **Asymmetric Mannich reaction of $\alpha$ -Diazocarbonyl compounds and *N*-sulfonyl Cyclic Ketimines Catalyzed by Complexes Generated from Chiral and Achiral Phosphines with Gold(I)**

**Minghui Zhou, Qin Su, Yesu Addepalli, Yun He,\* and Zhen Wang\***

School of Pharmaceutical Sciences and Chongqing Key Laboratory of Natural Drug Research,  
Chongqing University, 55 Daxuecheng South Road, Shapingba, Chongqing 401331, P. R.  
China

E-mail: wangz1114@cqu.edu.cn; yun.he@cqu.edu.cn

## **Contents:**

|                                                                               |     |
|-------------------------------------------------------------------------------|-----|
| 1. Optimization of the reaction conditions.....                               | S2  |
| 2. Control NMR experiments.....                                               | S3  |
| 3. ESI-QFT MS Analysis of Catalytic Solution.....                             | S9  |
| 4. IR experiment.....                                                         | S10 |
| 5. The analytical and spectral characterization data for the product.....     | S11 |
| 6. The analytical and spectral characterization data for the derivatives..... | S28 |
| 7. X-ray crystal structure for <b>5d</b> .....                                | S28 |
| 8. NMR spectra of the compounds <b>4-5</b> .....                              | S30 |

## 1. Optimization of the reaction conditions

### 1.1 The effect of metal salts on the nucleophile addition between $\alpha$ -diazocarbonyl with *N*-sulfonyl ketimines

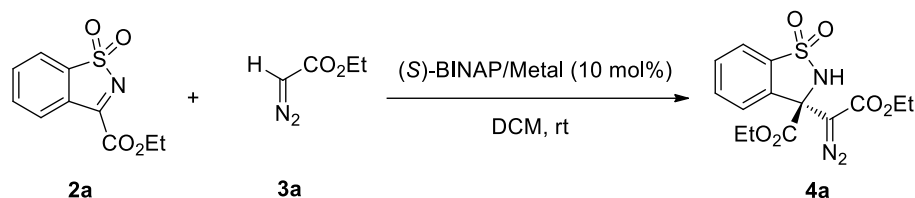

| entry <sup>a</sup> | metal salt (mol %)                                 | yield(%) <sup>b</sup> | ee(%) <sup>c</sup> |
|--------------------|----------------------------------------------------|-----------------------|--------------------|
| 1                  | Sc(OTf) <sub>3</sub>                               | trace                 | -                  |
| 2                  | NiCl <sub>2</sub> (PPh <sub>3</sub> ) <sub>2</sub> | 65                    | 0                  |
| 3                  | IrCl <sub>3</sub> (10)+AgClO <sub>4</sub> (30)     | 70                    | 50                 |
| 4                  | Ag <sub>2</sub> CO <sub>3</sub>                    | 65                    | 71                 |
| 5                  | Ag <sub>2</sub> O                                  | 59                    | 30                 |
| 6                  | AgClO <sub>4</sub>                                 | NR                    | -                  |
| 7                  | AgOTf                                              | 91                    | 60                 |

<sup>a</sup> Reactions were carried out with **2a** (0.2 mmol), **3a** (0.4 mmol), metal salt and catalyst (10 mol%), DCM (0.1 M). <sup>b</sup> Isolated yield. <sup>c</sup> Determined by HPLC analysis.

### 1.2 The effect of solvents on the Mannich reaction of $\alpha$ -diazocarbonyl with *N*-sulfonyl ketimines

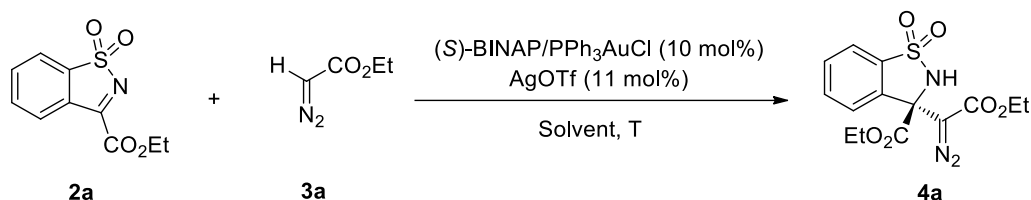

| entry <sup>a</sup> | solvent            | Temp(°C) | Time(h) | yield(%) <sup>b</sup> | ee(%) <sup>c</sup> |
|--------------------|--------------------|----------|---------|-----------------------|--------------------|
| 1                  | DCM                | rt       | 24      | 74                    | 78                 |
| 2                  | CHCl <sub>3</sub>  | rt       | 24      | NR                    | -                  |
| 3                  | THF                | rt       | 24      | trace                 | -                  |
| 4                  | CH <sub>3</sub> CN | rt       | 24      | 51                    | 57                 |
| 5                  | Et <sub>2</sub> O  | rt       | 24      | trace                 | -                  |
| 6                  | Toluene            | rt       | 24      | NR                    | -                  |
| 7                  | DCE                | rt       | 24      | 97                    | 85                 |
| 8                  | DCE                | 0        | 72      | 75                    | 82                 |
| 9                  | DCE                | 40       | 12      | 60                    | 81                 |

<sup>a</sup> Reactions were carried out with **2a** (0.2 mmol), **3a** (0.4 mmol), metal salt and catalyst (10 mol%), solvent (0.1 M). <sup>b</sup> Isolated yield. <sup>c</sup> Determined by HPLC analysis.

### 1.3 Effect of conducting orders of procedure

In order to investigate the effect of conducting orders of procedure, the control experiments were carried out as follows.

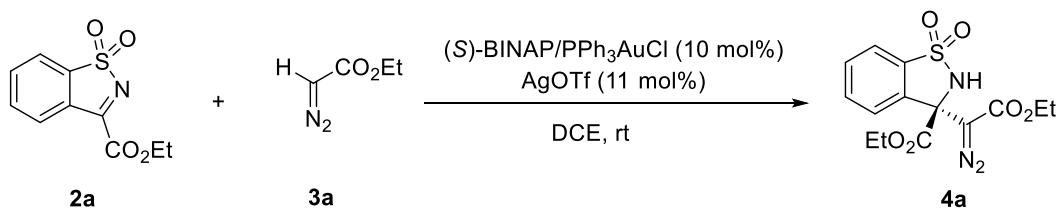

| entry <sup>a</sup> | conducting orders                                                                                                                     | yield(%) <sup>b</sup> | ee(%) <sup>c</sup> |
|--------------------|---------------------------------------------------------------------------------------------------------------------------------------|-----------------------|--------------------|
| 1                  | The mixture of ( <i>S</i> )-BINAP, PPh <sub>3</sub> AuCl, AgOTf, <b>2a</b> and <b>3a</b> was stirred in DCE together.                 | 84                    | 83                 |
| 2                  | The mixture of ( <i>S</i> )-BINAP, AgOTf, <b>2a</b> and <b>3a</b> was stirred in DCE first, and then PPh <sub>3</sub> AuCl was added. | 82                    | 83                 |

<sup>a</sup> The reactions were carried out with **2a** (0.1 mmol), **3a** (0.2 mmol), PPh<sub>3</sub>AuCl (10 mol%), AgOTf (11 mol%) and (*S*)-BINAP (11 mol%) in DCE (0.1 M) at rt for 24 h. <sup>b</sup> Isolated yield. <sup>c</sup> Determined by HPLC analysis.

## 2. Control NMR experiments

## 2.1 $^1\text{H}$ , $^{13}\text{C}$ NMR of catalytic mixture

To gain insight into the mechanism of Mannich reaction of  $\alpha$ -diazocarbonyl compounds and *N*-sulfonyl cyclic ketimines catalyzed by gold(I) complex, NMR analysis was attempted. The preparation procedures and analysis of catalyst samples for NMR were as follows.

(a)  $^1\text{H}$  NMR Analysis of Catalyst Solution

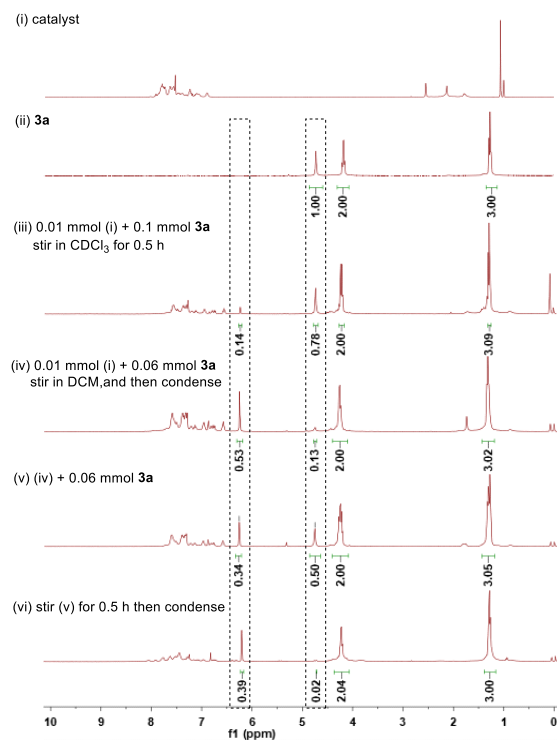

(b)  $^{13}\text{C}$  NMR Analysis of Catalyst Solution

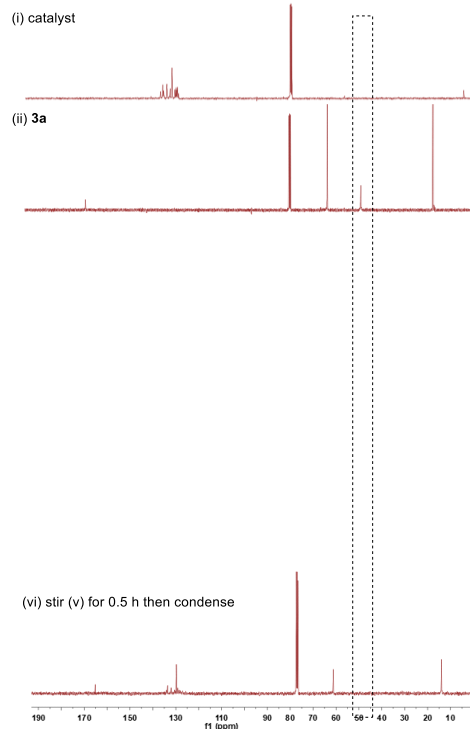

**Sample i:** (*S*)-BINAP (0.01 mmol, 6.3 mg),  $\text{PPh}_3\text{AuCl}$  (0.01 mmol, 5.0 mg),  $\text{AgOTf}$  (0.011 mmol, 2.8 mg) were stirred in 1.0 ml DCM at room temperature for 10 min. The filtrate was concentrated in vacuo. The resulting compound dissolved in  $\text{CDCl}_3$  (0.5 ml) and transferred to a dry NMR tube.  $^1\text{H}$  NMR and  $^{13}\text{C}$  NMR were taken with the sample at 25  $^\circ\text{C}$ .

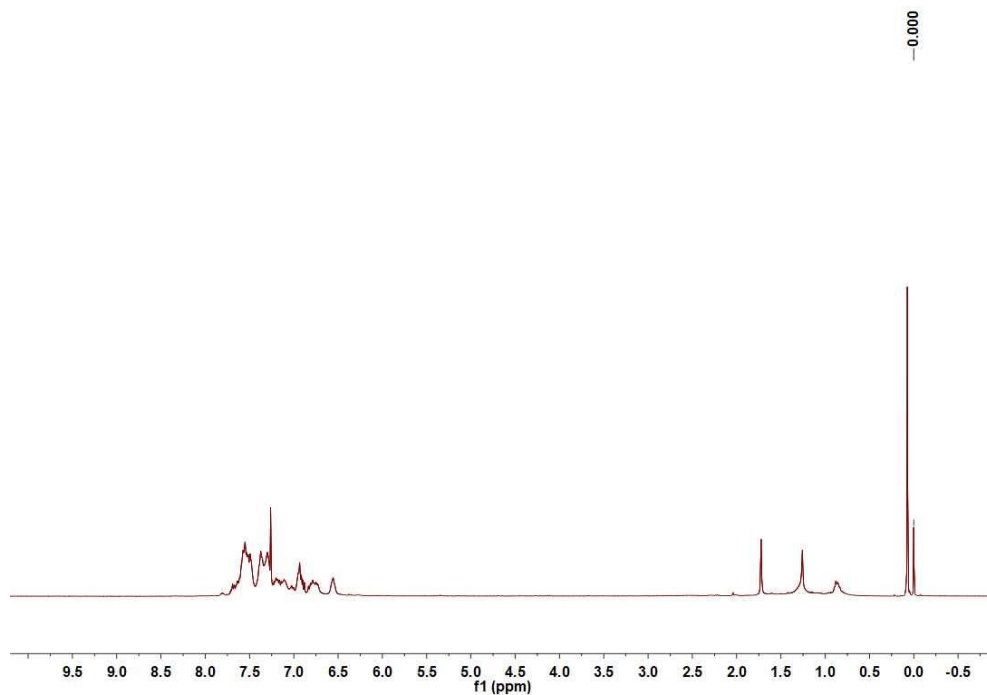

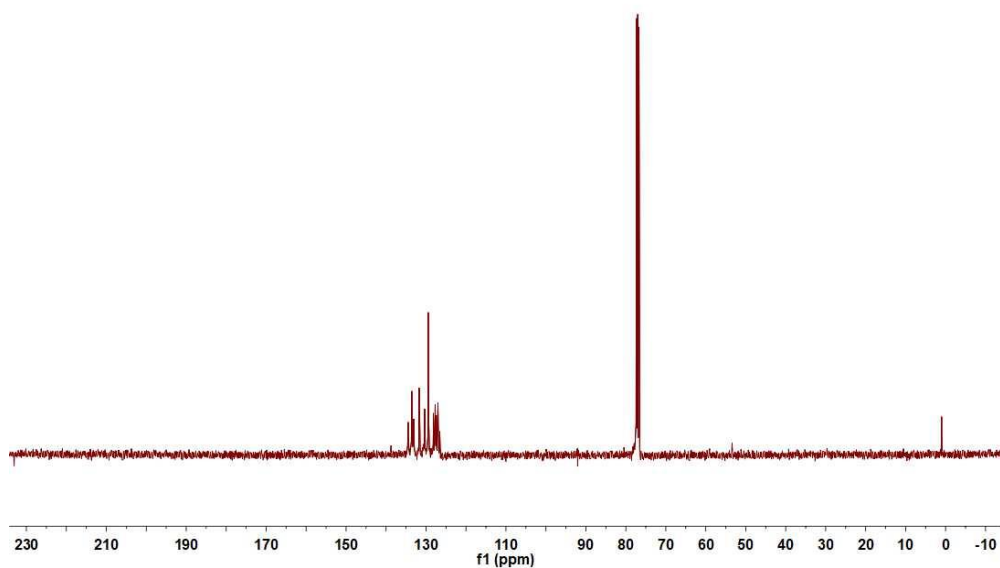

$^1\text{H}$  NMR,  $^{13}\text{C}$  NMR analysis of sample i

**Sample ii:** Dissolved **3a** in  $\text{CDCl}_3$  and transferred to a dried NMR tube.  $^1\text{H}$  NMR and  $^{13}\text{C}$  NMR were taken with the sample at 25 °C.

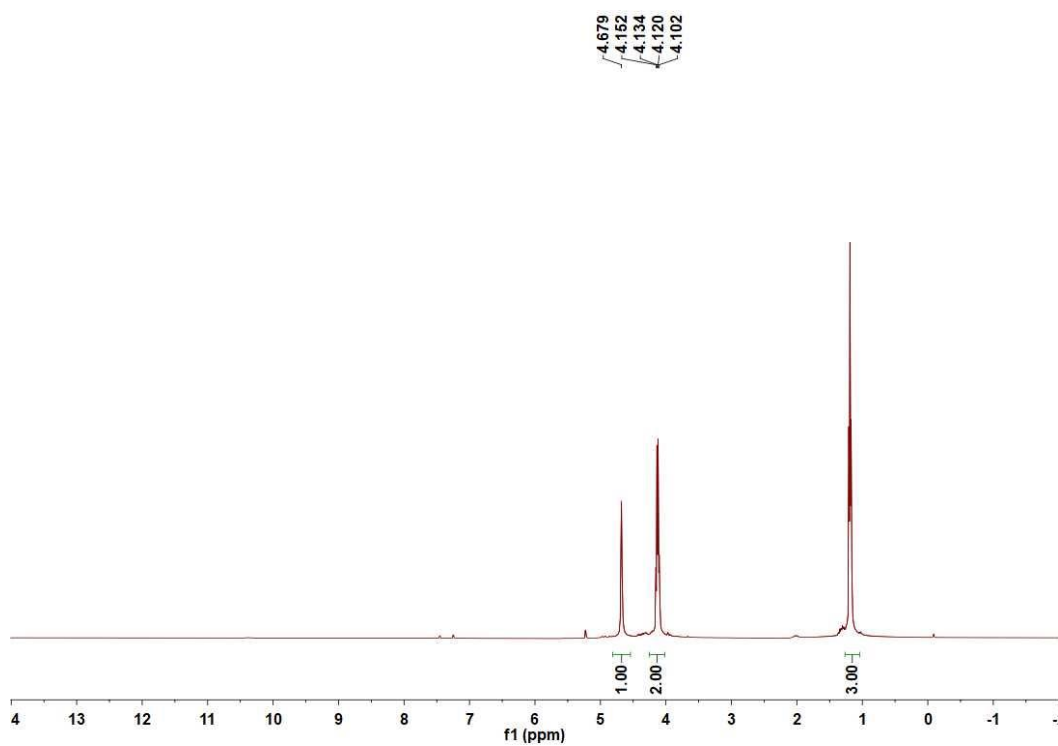

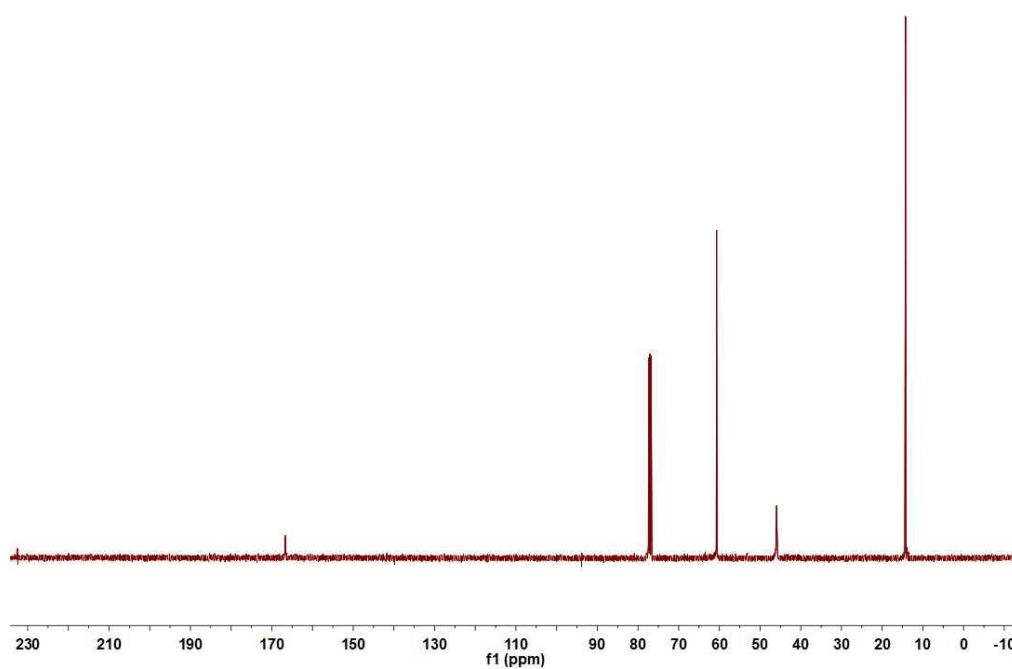

$^1\text{H}$  NMR,  $^{13}\text{C}$  NMR analysis of sample ii

**Sample iii:** (*S*)-BINAP (0.01 mmol, 6.3 mg),  $\text{PPh}_3\text{AuCl}$  (0.01 mmol, 5.0 mg), AgOTf (0.011 mmol, 2.8 mg) were stirred in 1.0 ml  $\text{CDCl}_3$  at room temperature for 10 min then filtered. **3a** (0.1 mmol, 25  $\mu\text{l}$ ) was added, and then stirred the mixture for 0.5 h. The mixture transferred directly to a dry NMR tube.  $^1\text{H}$  NMR was taken with the sample at 25  $^\circ\text{C}$ .

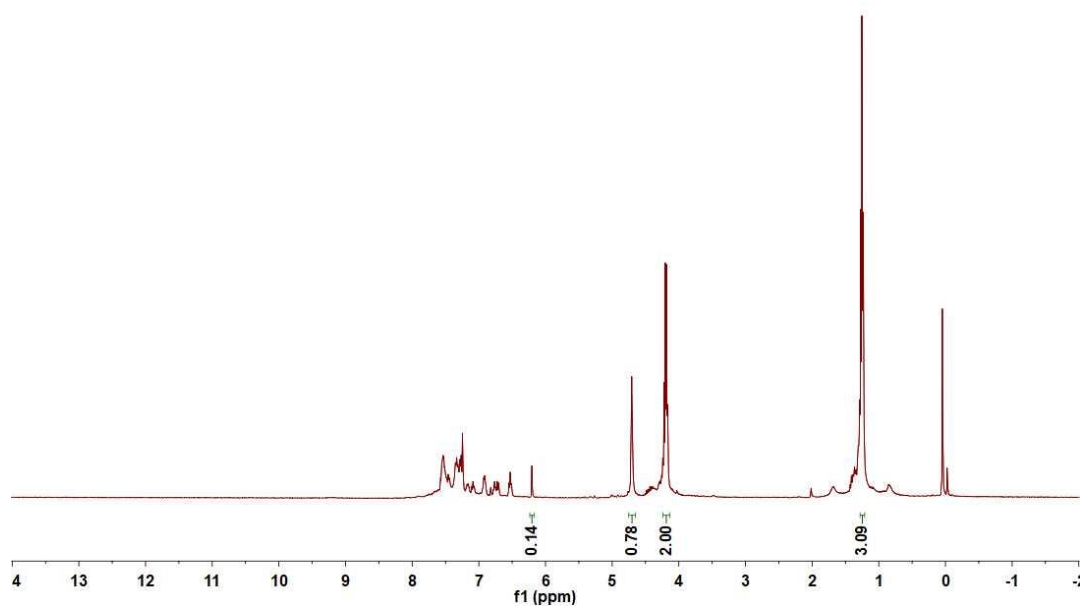

$^1\text{H}$  NMR analysis of sample iii

**Sample iv:** (*S*)-BINAP (0.01 mmol, 6.3 mg), PPh<sub>3</sub>AuCl (0.01 mmol, 5.0 mg), AgOTf (0.011 mmol, 2.8 mg) were stirred in 1.0 ml DCM at room temperature for 10 min then filtered. **3a** (0.06 mmol, 15 µl) was added. Stirred the resulting mixture for 0.5 h and then concentrated in vacuo. The resulting compound dissolved in CDCl<sub>3</sub> (0.5 ml) and transferred to a dry NMR tube. <sup>1</sup>H NMR was taken with the sample at 25 °C.

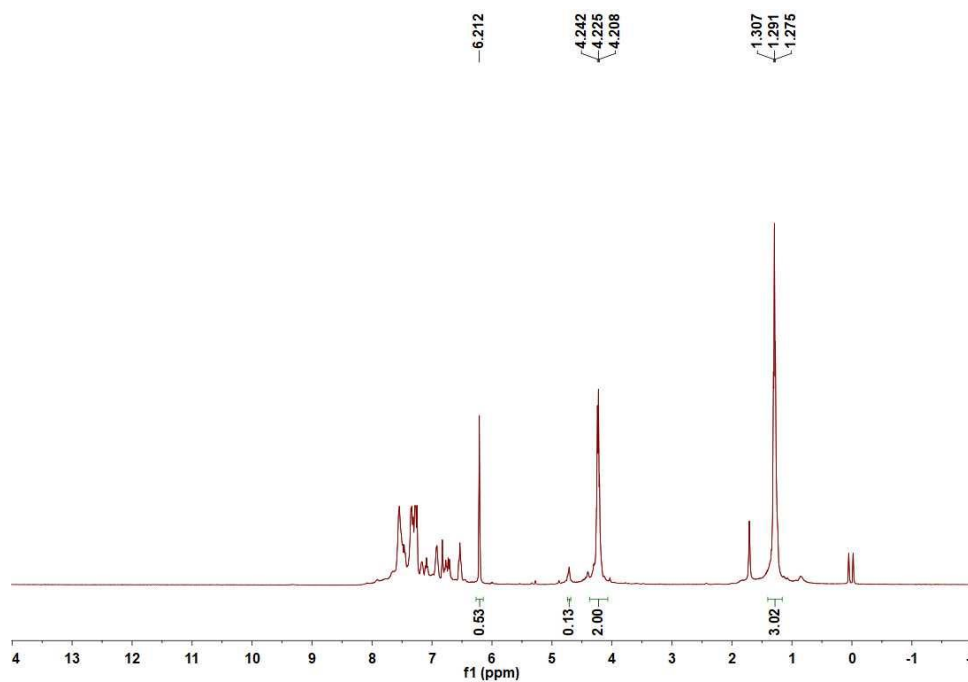

<sup>1</sup>H NMR analysis of sample iv

**Sample v:** **3a** (0.06 mmol, 15 µl) was added directly to the NMR tube of sample iv. <sup>1</sup>H NMR was taken with the sample at 25 °C.

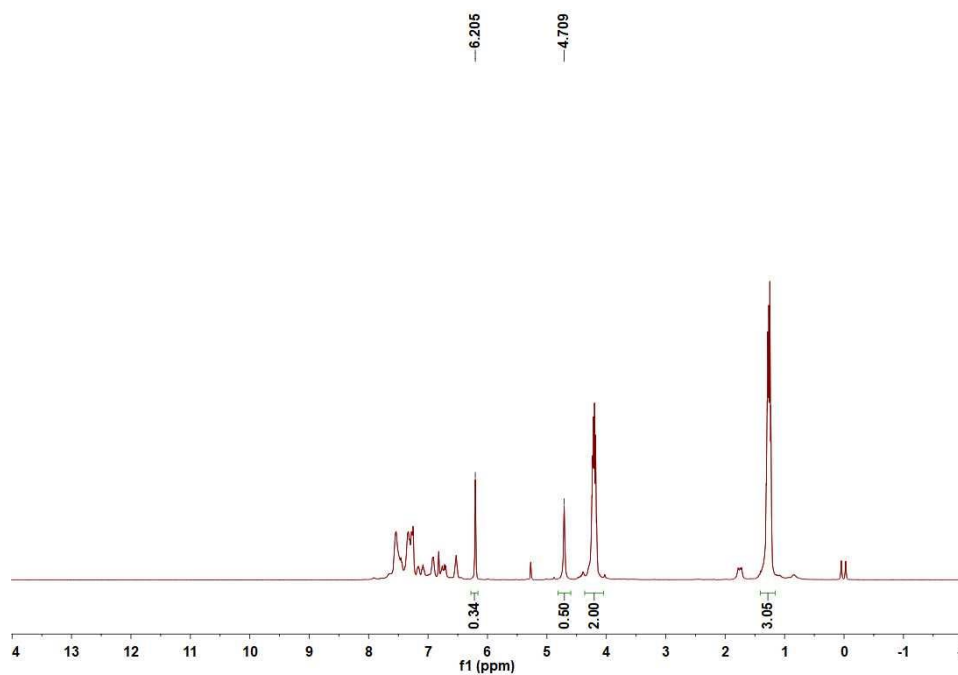

<sup>1</sup>H NMR analysis of sample v

**Sample vi:** Removed  $\text{CDCl}_3$  of sample v and dissolved the compounds in 1.0 ml DCM. Stirred the resulting mixture for 0.5 h and then concentrated in vacuo. The resulting compounds dissolved again in  $\text{CDCl}_3$  (0.5 ml) and transferred to a dry NMR tube.  $^1\text{H}$  NMR and  $^{13}\text{C}$  NMR were taken with the sample at 25 °C.

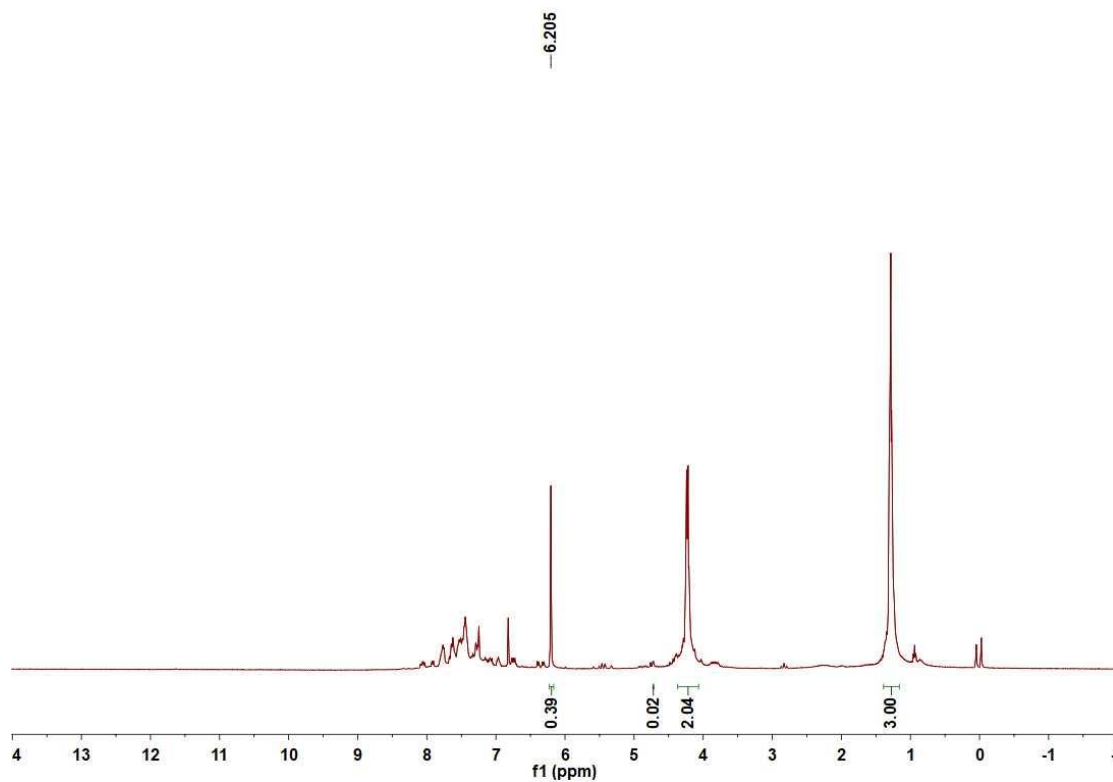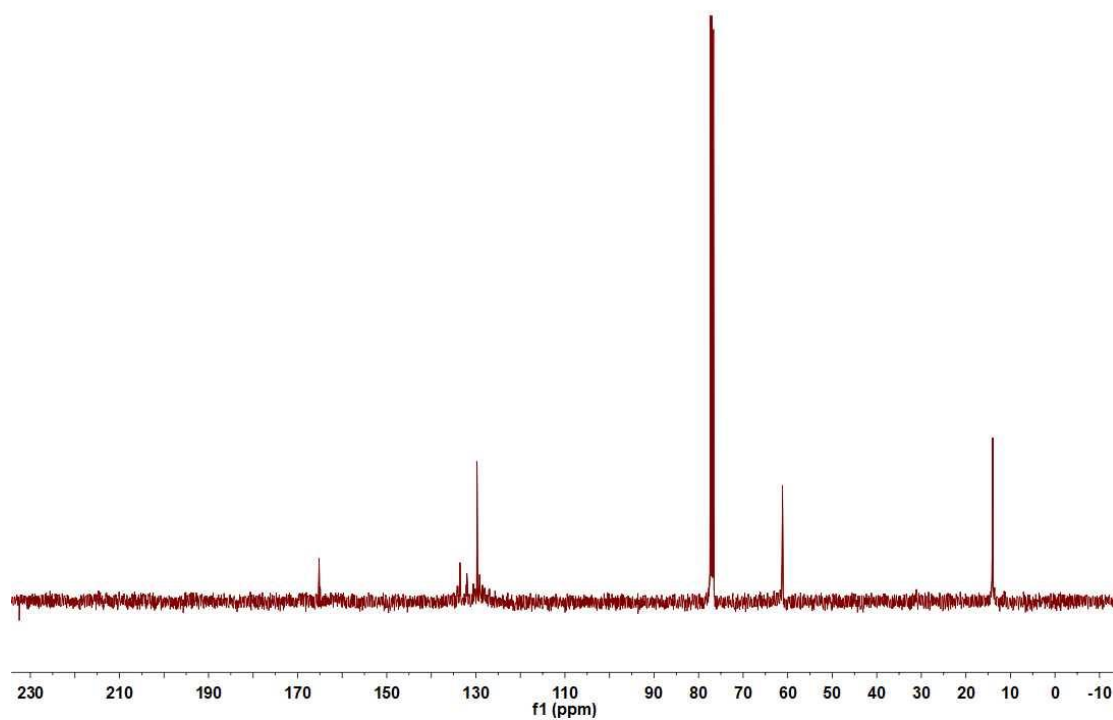

$^1\text{H}$  NMR,  $^{13}\text{C}$  NMR analysis of sample vi



## 2.2 $^{31}\text{P}$ NMR of catalytic mixture

(a) (*S*)-BINAP (0.01 mmol, 6.3 mg),  $\text{Me}_2\text{SAuCl}$  (0.01 mmol, 2.9 mg),  $\text{AgOTf}$  (0.011 mmol, 2.8 mg) were stirred in 1.0 ml DCM at room temperature for 10 min, and then the filtrate concentrated in vacuo. The resulting compound dissolved in  $\text{CDCl}_3$  (0.5 ml) and transferred to a dried NMR tube.  $^{31}\text{P}$  NMR was taken with the sample at 25 °C.

(b) (*S*)-BINAP (0.01 mmol, 6.3 mg),  $\text{AgOTf}$  (0.011 mmol, 2.8 mg) were stirred in 1.0 ml DCM at room temperature for 10 min, and then the filtrate concentrated in vacuo. The resulting compound dissolved in  $\text{CDCl}_3$  (0.5 ml) and transferred to a dried NMR tube.  $^{31}\text{P}$  NMR was taken with the sample at 25 °C.

(c) (*S*)-BINAP (0.01 mmol, 6.3 mg),  $\text{PPh}_3\text{AuCl}$  (0.01 mmol, 5.0 mg),  $\text{AgOTf}$  (0.011 mmol, 2.8 mg) were stirred in 1.0 ml DCM at room temperature for 10 min, and then the filtrate concentrated in vacuo. The resulting compound dissolved in  $\text{CDCl}_3$  (0.5 ml) and transferred to a dry NMR tube.  $^{31}\text{P}$  NMR was taken with the sample at 25 °C.

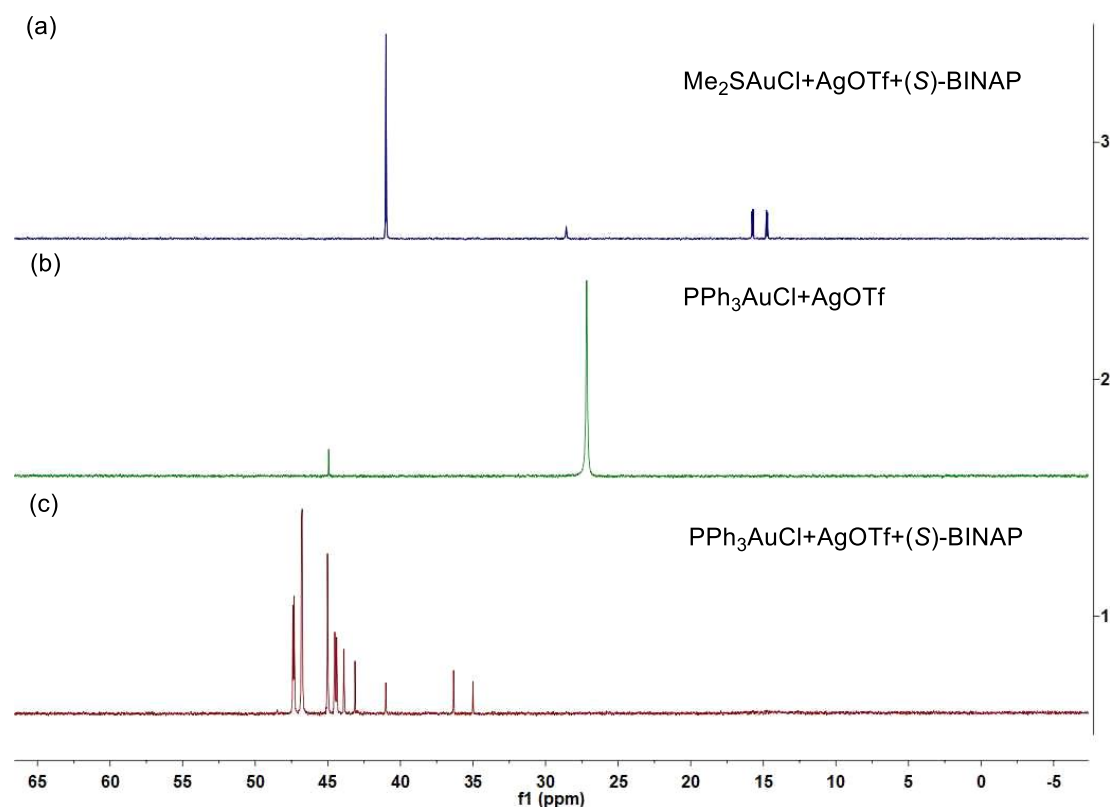

$^{31}\text{P}$  NMR of catalyst mixture

## 3. ESI-QFT MS Analysis of Catalytic Solution

The catalytic composition of (*S*)-BINAP,  $\text{Au(I)PPh}_3$  and diazocarbonyl compound **3a** was investigated by using ESIMS. The results indicated that an MS peak at 1081.2540 (HR-ESIMS:  $m/z$  calcd for  $[\text{C}_{62}\text{H}_{47}\text{AuP}_3]^+$ : 1081.2556) could be assigned to complex  $[(\text{S})\text{-BINAP-Au(I)PPh}_3]^+$ .

## ESI-QFT MS Analysis of Catalytic Solution

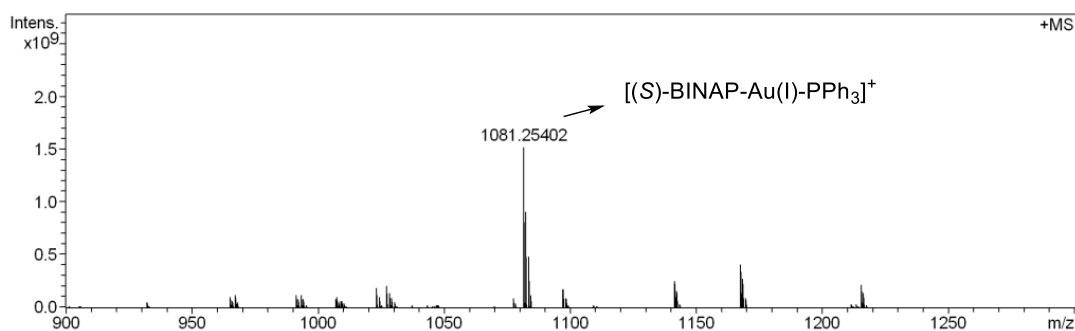

Additionally, another MS peak at 933.2279 (ESIMS:  $m/z$  calcd for  $[\text{C}_{48}\text{H}_{38}\text{AuN}_2\text{O}_2\text{P}_2]^+$ : 933.2074) also could be assigned to possible intermediate  $[(S)\text{-BINAP-Au(I)-3a}]^+$ .

## ESI-QFT MS Analysis of Catalytic Solution

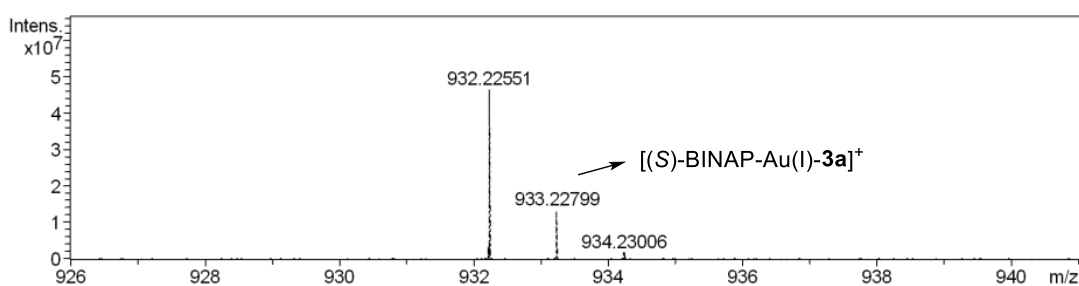

## 4. IR experiment

In Operando IR experiment, it was demonstrated that the amount of Mannich product **4a** increased with the consumption of *N*-sulfonyl cyclic ketimine **2a** and diazocarbonyl compound **3a**.

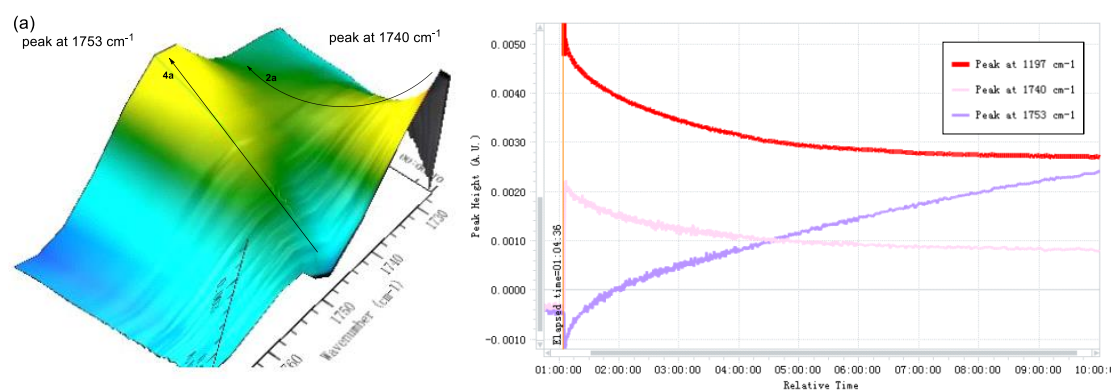

Operando IR experiment: (a) **2a** was added to the stirring mixture of gold(I) complex and **3a** after 1 h.

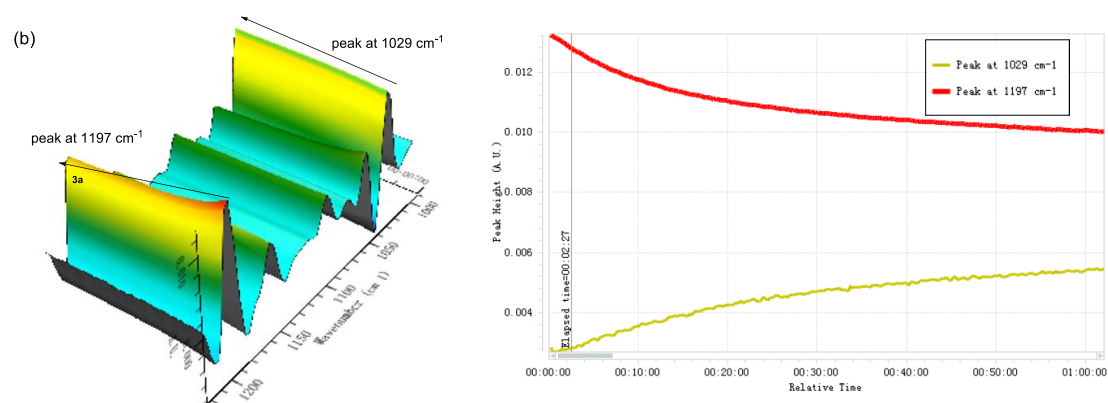

Operando IR experiment: (b) Stirring gold(I) complex and **3a** for 1 h.

The intermediate was detected by Operando IR experiment (Peak at 1029  $\text{cm}^{-1}$ ). 2-Methoxy-1-propene was used as analogue of intermediate in Operando IR experiment. The IR experiment analysis of 2-Methoxy-1-propene was as follows. The characteristic peak of 2-Methoxy-1-propene was at 1085  $\text{cm}^{-1}$  (peak of intermediate was found at 1029  $\text{cm}^{-1}$ ).

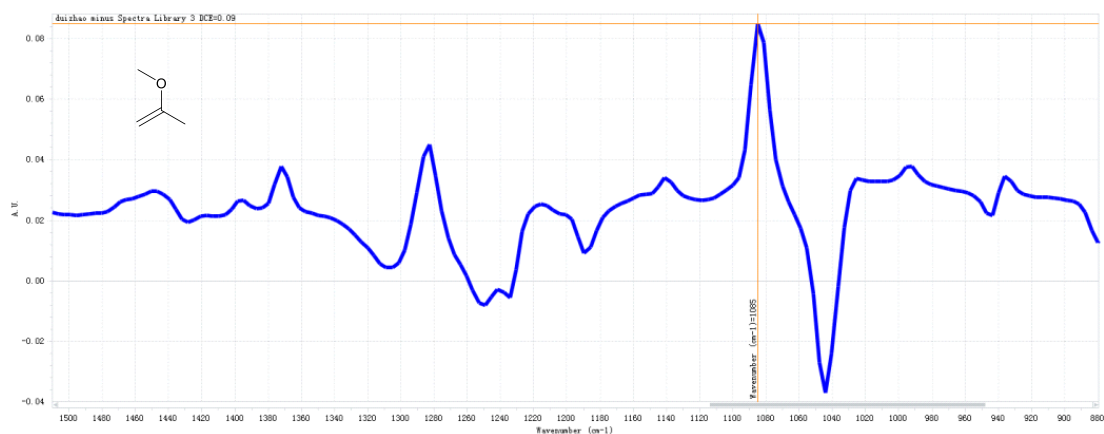

IR experiment analysis of 2-Methoxy-1-propene

## 5. The analytical and spectral characterization data for the product

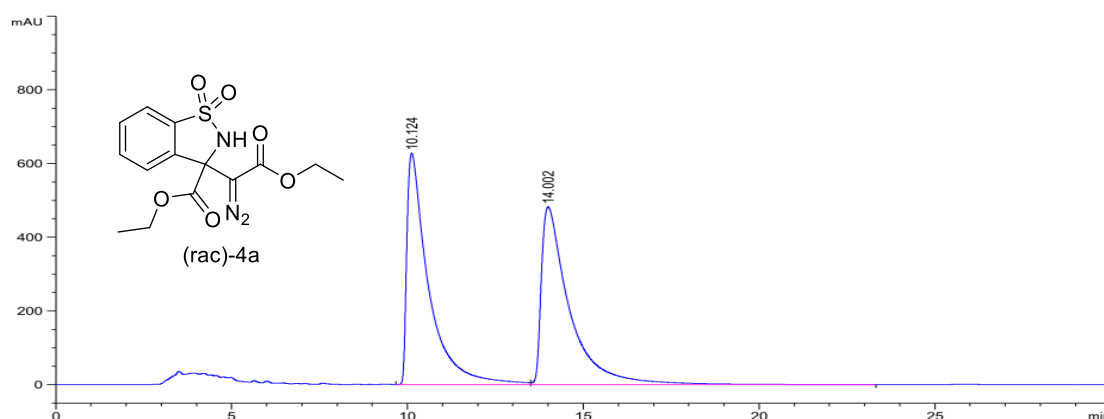

|   | Retention time (min) | Area (mAu + s) | %Area   |
|---|----------------------|----------------|---------|
| 1 | 10.124               | 2.68555e4      | 50.0936 |
| 2 | 14.002               | 2.67551e4      | 49.9064 |

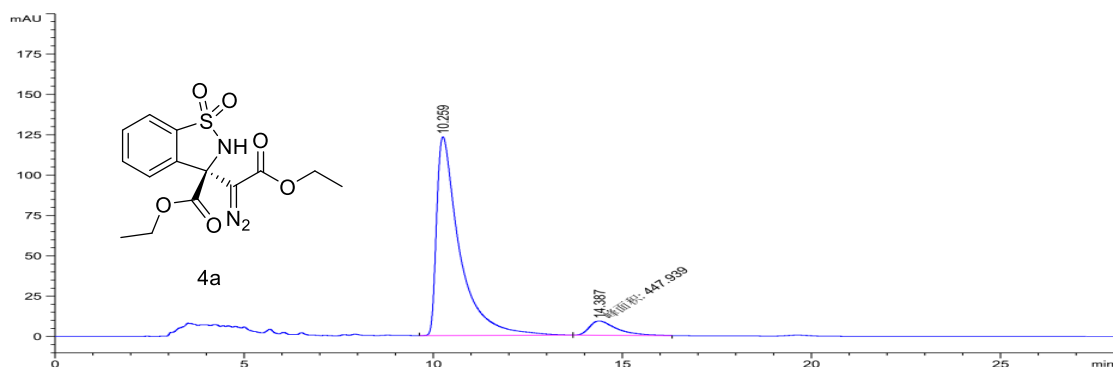

|   | Retention time (min) | Area (mAu + s) | %Area   |
|---|----------------------|----------------|---------|
| 1 | 10.259               | 5176.67285e4   | 92.0361 |
| 2 | 14.387               | 447.93936e4    | 7.9639  |

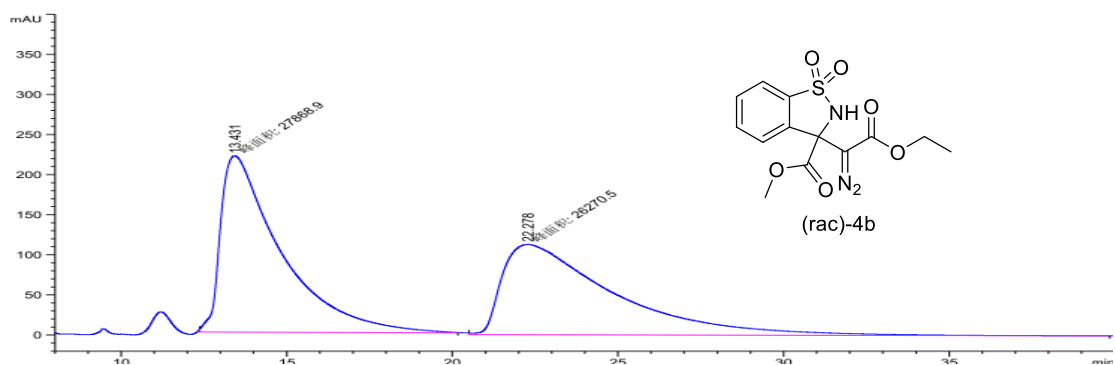

|   | Retention time (min) | Area (mAu + s) | %Area   |
|---|----------------------|----------------|---------|
| 1 | 13.431               | 2.78689e4      | 51.4762 |
| 2 | 22.278               | 2.62705e4      | 48.5238 |

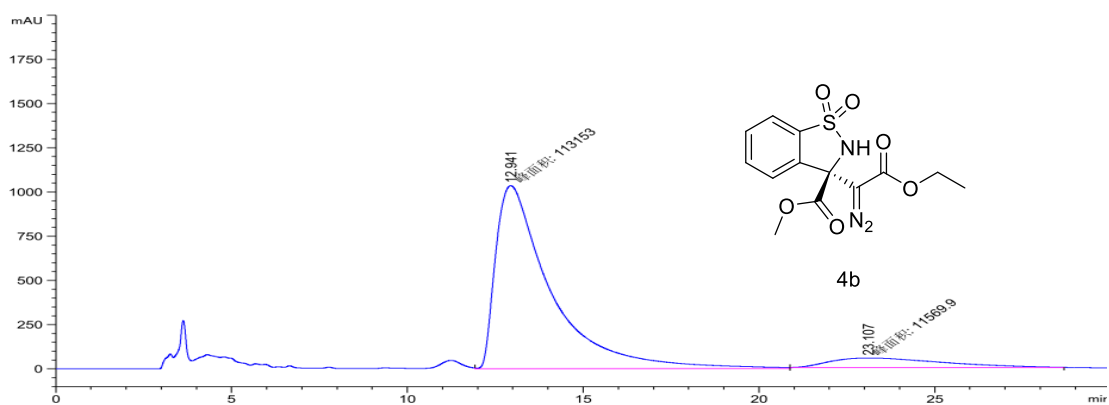

|   | Retention time (min) | Area (mAu + s) | %Area   |
|---|----------------------|----------------|---------|
| 1 | 12.941               | 1.13153e5      | 90.7235 |
| 2 | 23.107               | 1.15699e4      | 9.2765  |

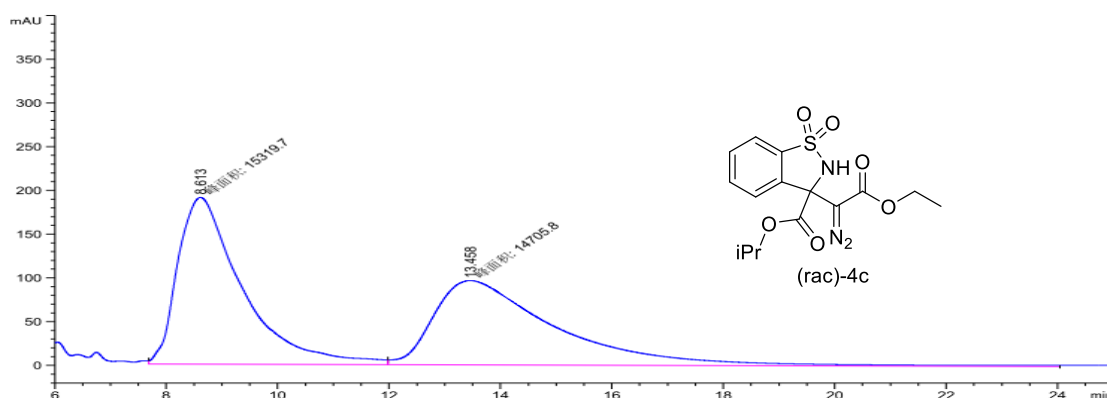

|   | Retention time (min) | Area (mAu + s) | %Area   |
|---|----------------------|----------------|---------|
| 1 | 8.613                | 1.53197e4      | 51.0224 |
| 2 | 13.458               | 1.47058e4      | 48.9776 |

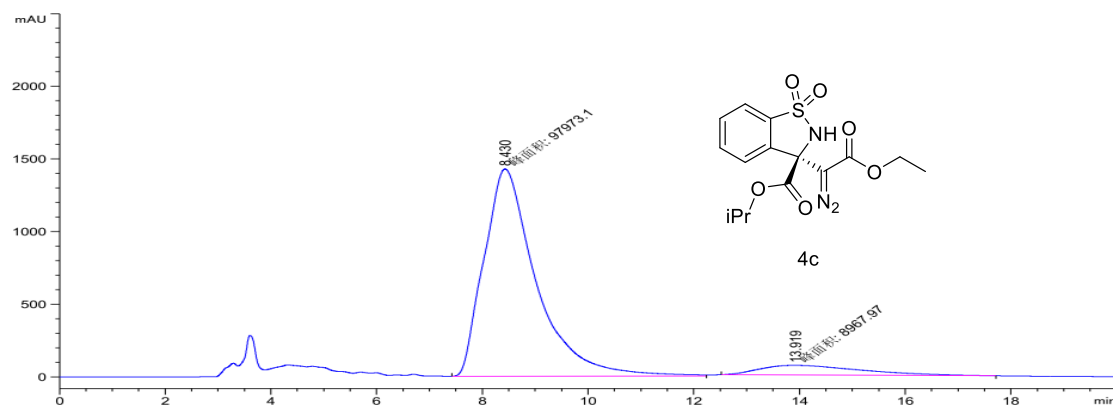

|   | Retention time (min) | Area (mAu + s) | %Area   |
|---|----------------------|----------------|---------|
| 1 | 8.430                | 9.79731e4      | 91.6141 |
| 2 | 13.919               | 8967.97461     | 8.3859  |

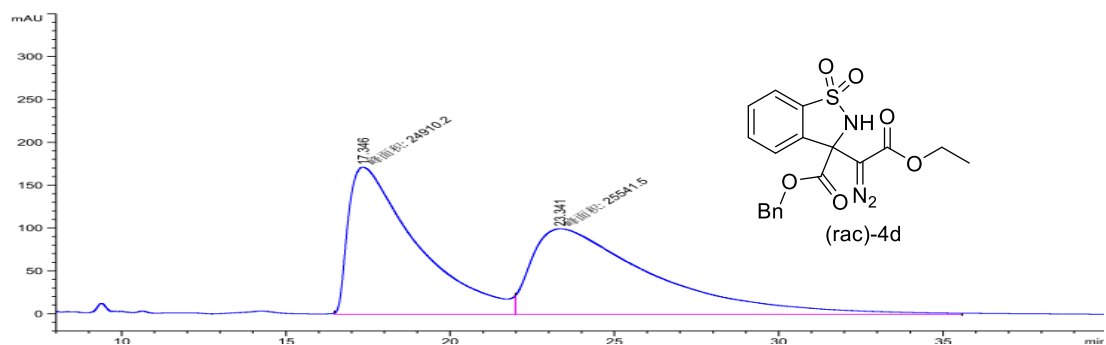

|   | Retention time (min) | Area (mAu + s) | %Area   |
|---|----------------------|----------------|---------|
| 1 | 17.346               | 2.49102e4      | 49.3744 |
| 2 | 23.341               | 2.55415e4      | 50.6256 |

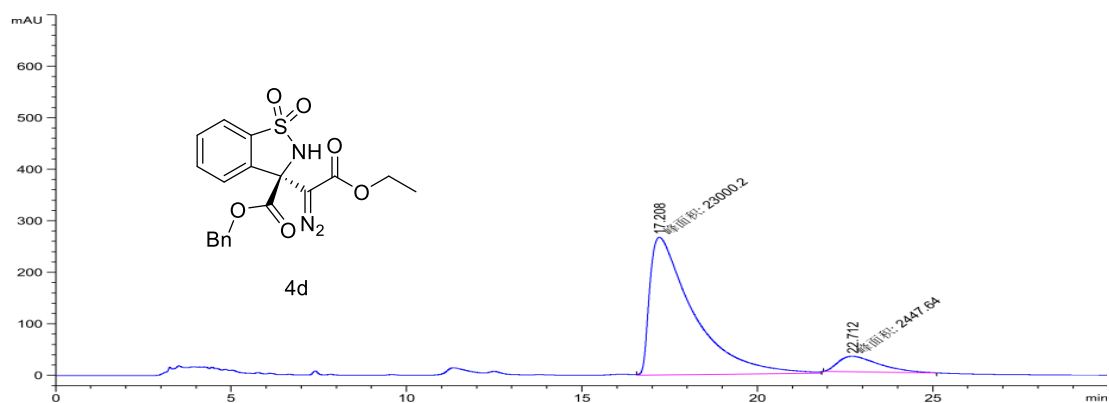

|  | Retention time (min) | Area (mAu + s) | %Area |
|--|----------------------|----------------|-------|
|--|----------------------|----------------|-------|

|   |        |            |         |
|---|--------|------------|---------|
| 1 | 17.208 | 2.30002e4  | 90.3817 |
| 2 | 22.712 | 2447.64038 | 9.6183  |

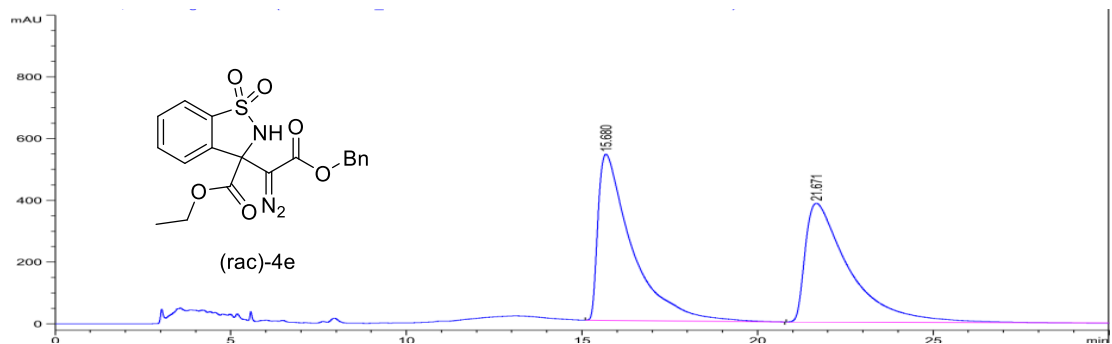

|   | Retention time (min) | Area (mAu + s) | %Area   |
|---|----------------------|----------------|---------|
| 1 | 15.680               | 3.61998e4      | 51.8893 |
| 2 | 21.671               | 3.35637e4      | 48.1107 |

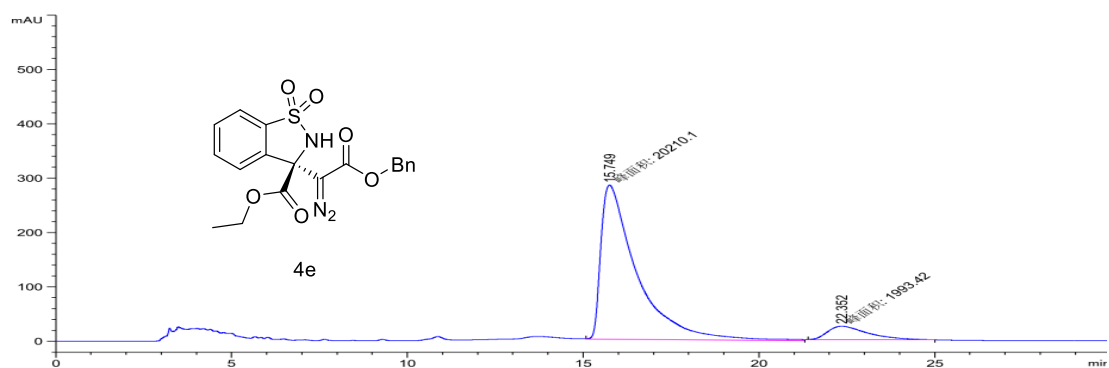

|   | Retention time (min) | Area (mAu + s) | %Area   |
|---|----------------------|----------------|---------|
| 1 | 15.749               | 2.02101e4      | 91.0221 |
| 2 | 22.352               | 1993.41882     | 8.9779  |

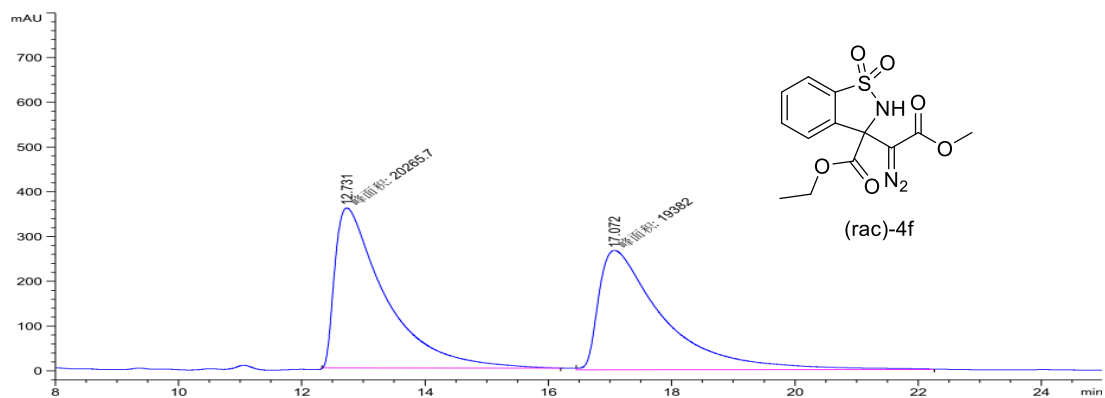

|   | Retention time (min) | Area (mAu + s) | %Area   |
|---|----------------------|----------------|---------|
| 1 | 12.731               | 2.02657e4      | 51.1144 |
| 2 | 17.072               | 1.93820e4      | 48.8856 |

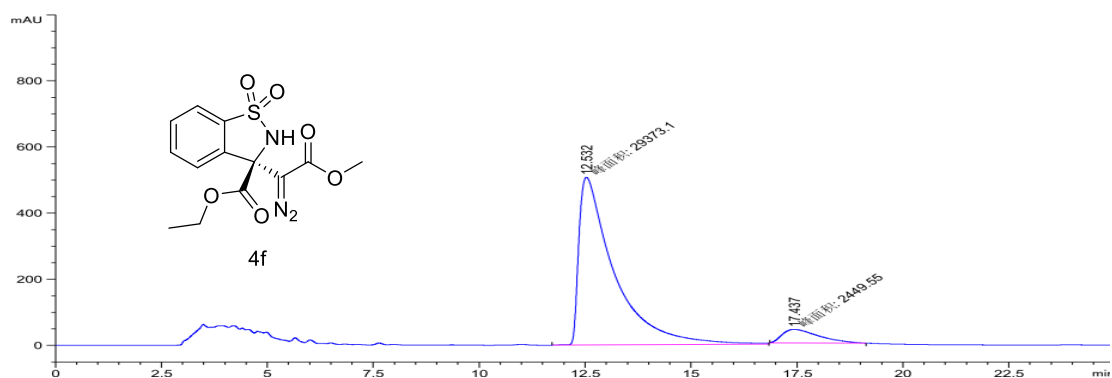

|   | Retention time (min) | Area (mAu + s) | %Area   |
|---|----------------------|----------------|---------|
| 1 | 12.532               | 2.93731e4      | 92.3025 |
| 2 | 17.437               | 2449.55225     | 7.6975  |

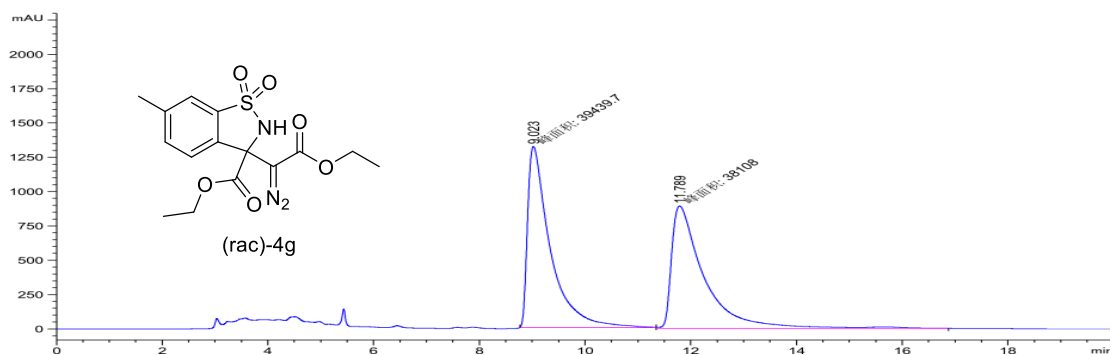

|  | Retention time (min) | Area (mAu + s) | %Area |
|--|----------------------|----------------|-------|
|--|----------------------|----------------|-------|



|   |        |           |         |
|---|--------|-----------|---------|
| 1 | 9.023  | 3.94397e4 | 50.8586 |
| 2 | 11.789 | 3.81080e4 | 49.1414 |

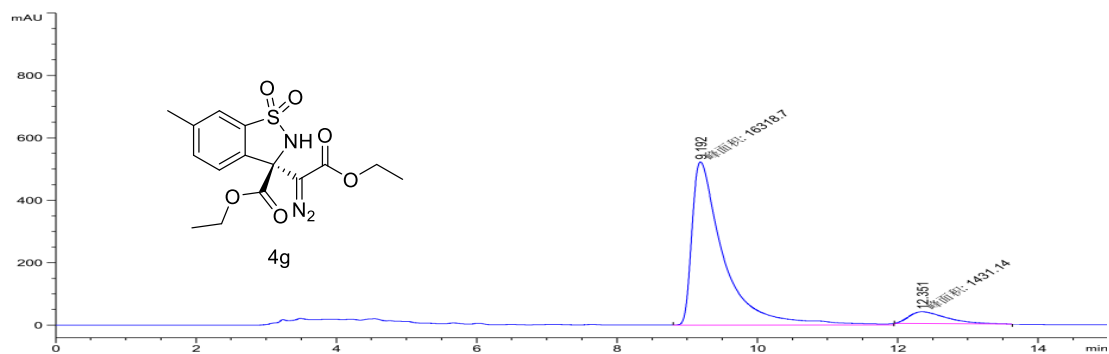

|   | Retention time (min) | Area (mAu + s) | %Area   |
|---|----------------------|----------------|---------|
| 1 | 9.192                | 1.63187e4      | 91.9372 |
| 2 | 12.351               | 1431.14148     | 8.0628  |

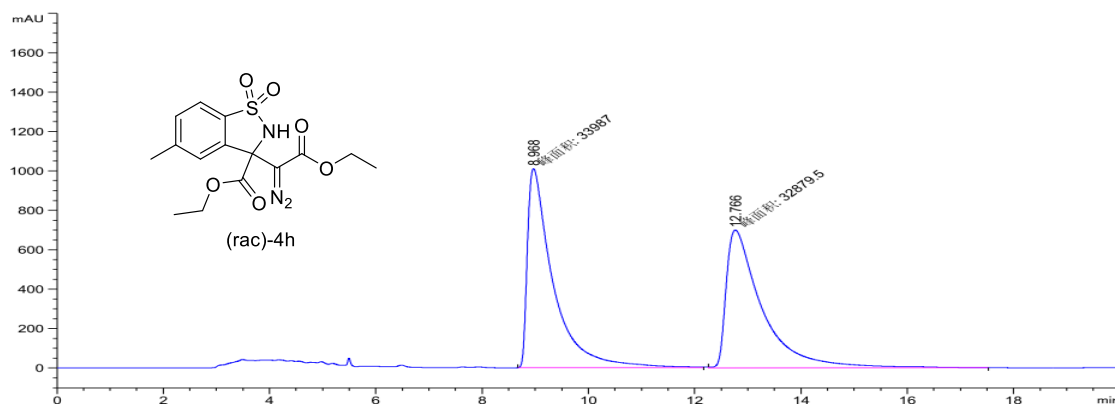

|   | Retention time (min) | Area (mAu + s) | %Area   |
|---|----------------------|----------------|---------|
| 1 | 8.968                | 3.39870e4      | 50.8281 |
| 2 | 12.766               | 3.28795e4      | 49.1719 |

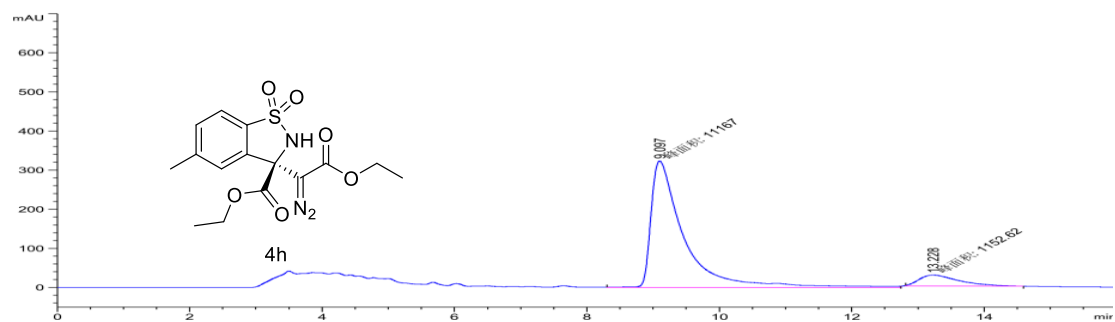

|   | Retention time (min) | Area (mAu + s) | %Area   |
|---|----------------------|----------------|---------|
| 1 | 9.097                | 1.11670e4      | 90.6441 |
| 2 | 13.228               | 1152.61780     | 9.3559  |

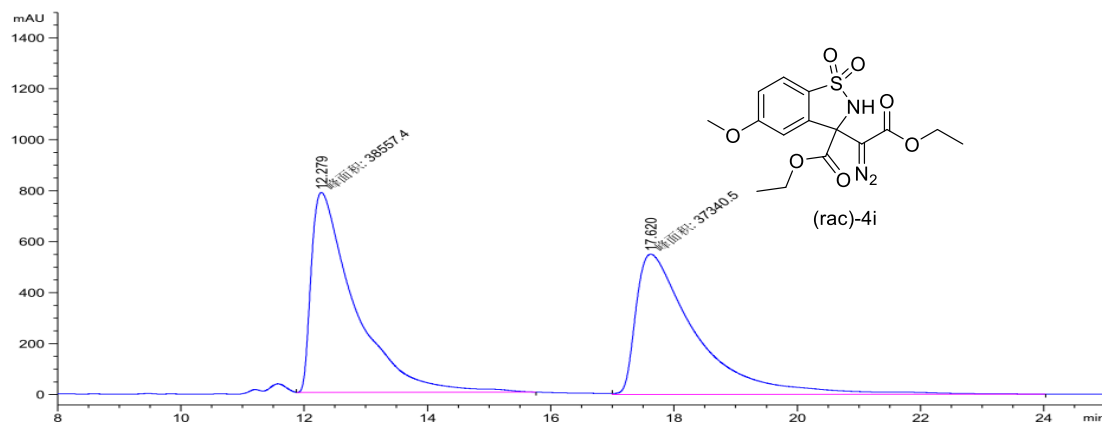

|   | Retention time (min) | Area (mAu + s) | %Area   |
|---|----------------------|----------------|---------|
| 1 | 12.279               | 3.85574e4      | 50.8016 |
| 2 | 17.620               | 3.73405e4      | 49.1984 |

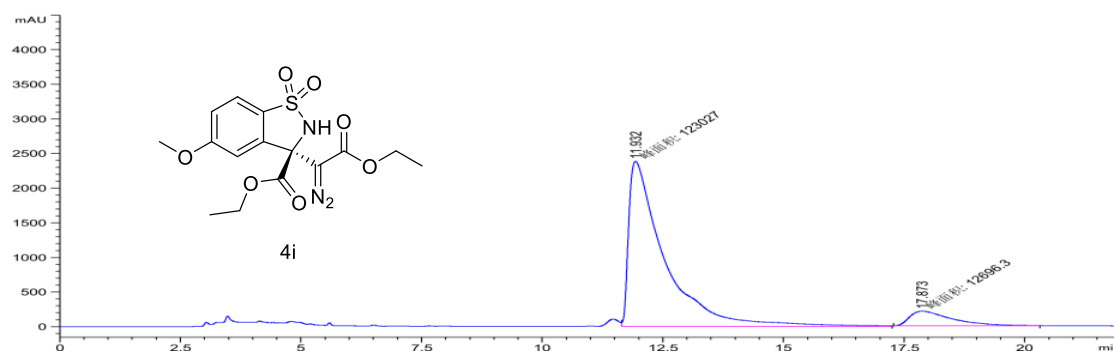

|   | Retention time (min) | Area (mAu + s) | %Area   |
|---|----------------------|----------------|---------|
| 1 | 11.932               | 1.23027e5      | 90.6454 |
| 2 | 17.873               | 1.26963e4      | 9.3546  |

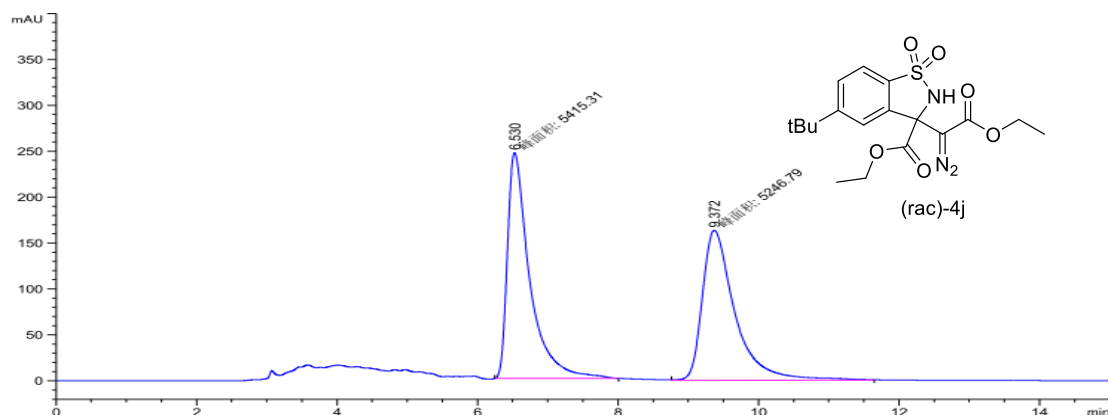

|   | Retention time (min) | Area (mAu + s) | %Area   |
|---|----------------------|----------------|---------|
| 1 | 6.530                | 5415.31201     | 50.7903 |
| 2 | 9.372                | 5246.79102     | 49.2097 |

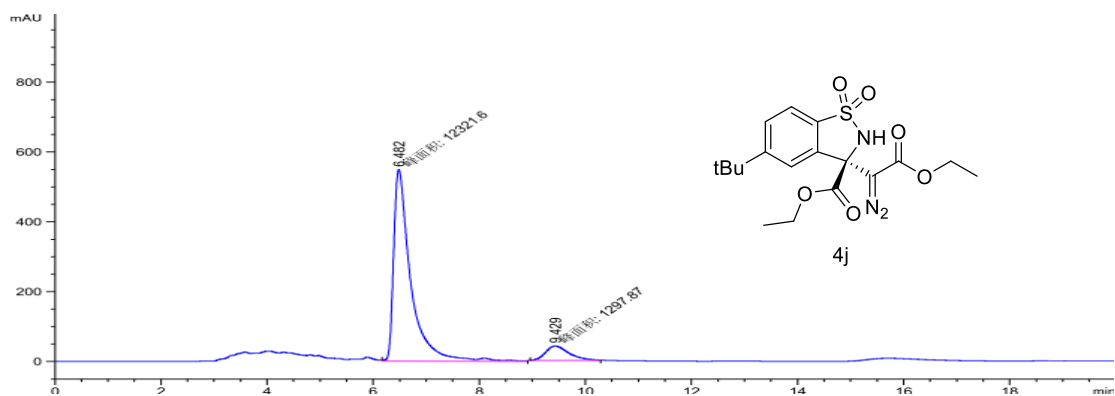

|   | Retention time (min) | Area (mAu + s) | %Area   |
|---|----------------------|----------------|---------|
| 1 | 6.482                | 1.23216e4      | 90.4704 |
| 2 | 9.429                | 1297.87061     | 9.5296  |

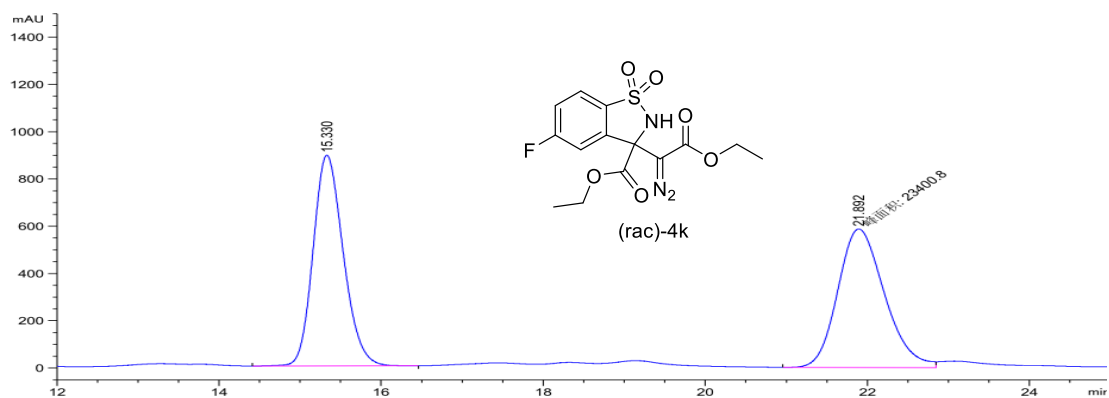

|   | Retention time (min) | Area (mAu + s) | %Area   |
|---|----------------------|----------------|---------|
| 1 | 15.330               | 2.30161e4      | 49.5857 |
| 2 | 21.892               | 2.34008e4      | 50.4143 |

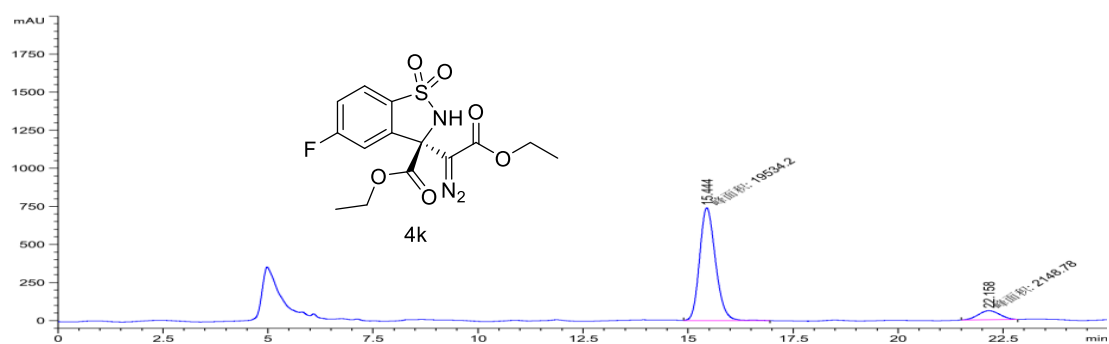

|   | Retention time (min) | Area (mAu + s) | %Area   |
|---|----------------------|----------------|---------|
| 1 | 5.444                | 1.95342e4      | 90.0900 |
| 2 | 22.158               | 2148.77979     | 9.9100  |

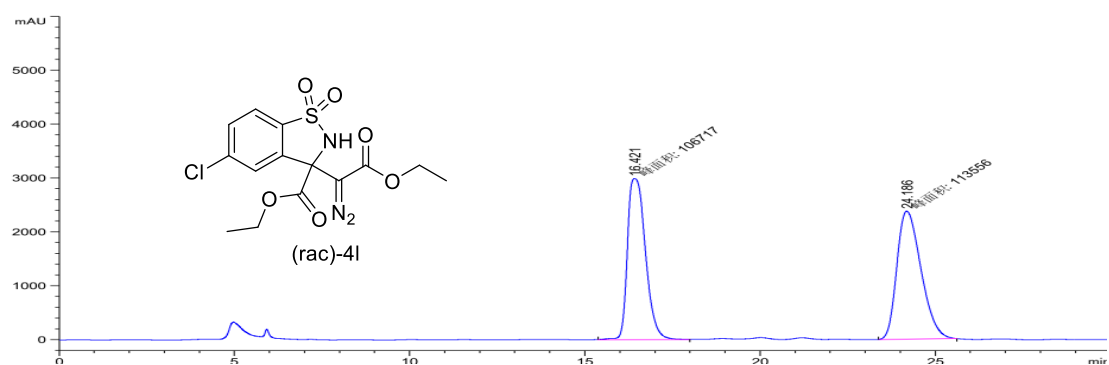

|   | Retention time (min) | Area (mAu + s) | %Area   |
|---|----------------------|----------------|---------|
| 1 | 16.421               | 1.06717e5      | 48.4477 |
| 2 | 24.186               | 1.13556e5      | 51.5523 |

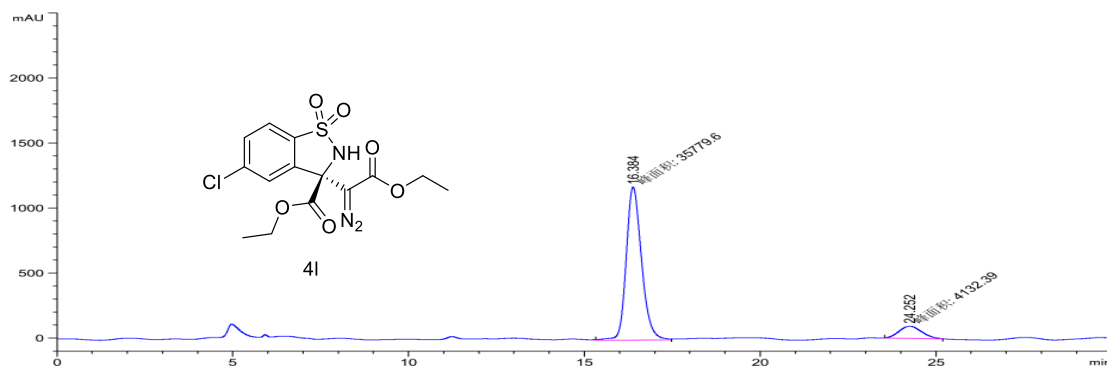

|   | Retention time (min) | Area (mAu + s) | %Area   |
|---|----------------------|----------------|---------|
| 1 | 16.384               | 3.57796e4      | 89.6463 |
| 2 | 24.252               | 4132.39160     | 10.3537 |

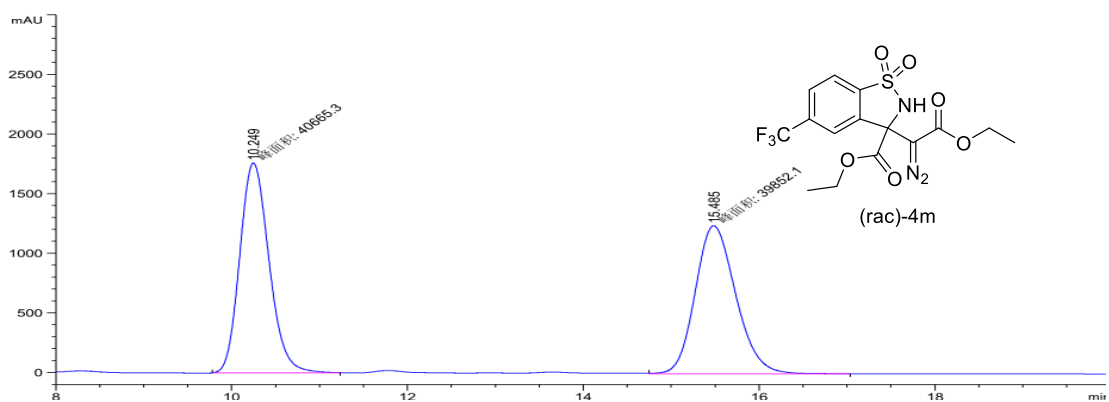

|   | Retention time (min) | Area (mAu + s) | %Area   |
|---|----------------------|----------------|---------|
| 1 | 10.249               | 4.06653e4      | 50.5050 |
| 2 | 15.485               | 3.98521e4      | 49.4950 |

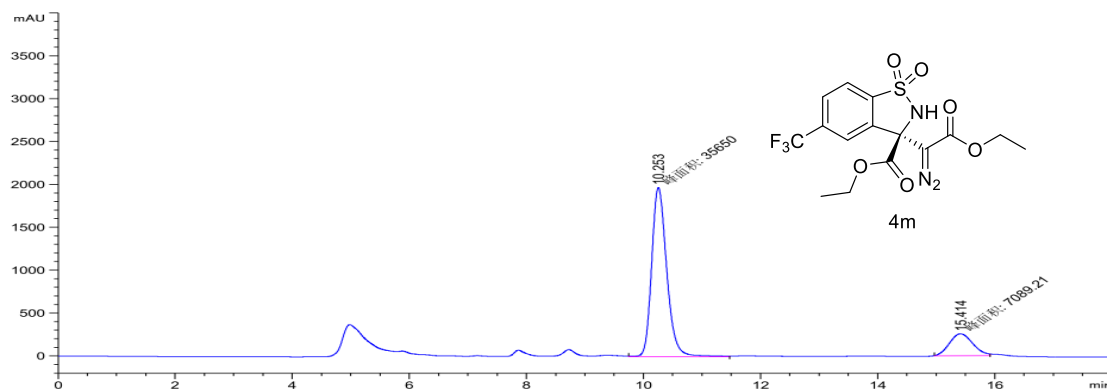

|   | Retention time (min) | Area (mAu + s) | %Area   |
|---|----------------------|----------------|---------|
| 1 | 10.253               | 3.56500e4      | 83.4129 |
| 2 | 15.414               | 7089.20801     | 16.5871 |

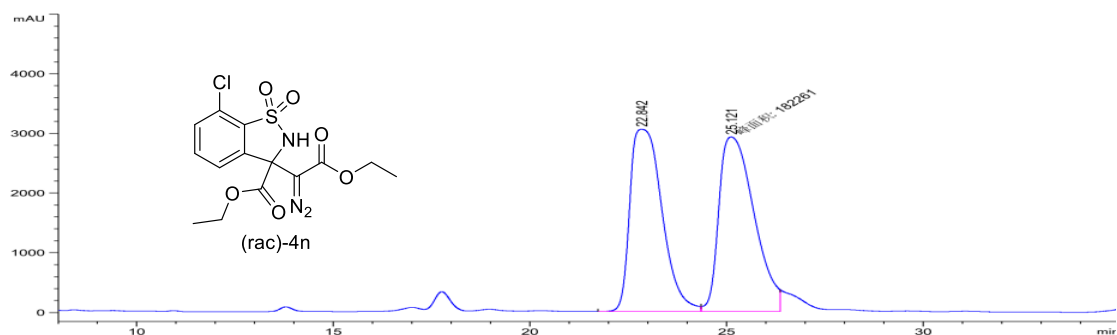

|   | Retention time (min) | Area (mAu + s) | %Area   |
|---|----------------------|----------------|---------|
| 1 | 22.842               | 1.73668e5      | 48.7930 |
| 2 | 25.121               | 1.82261e5      | 51.2070 |

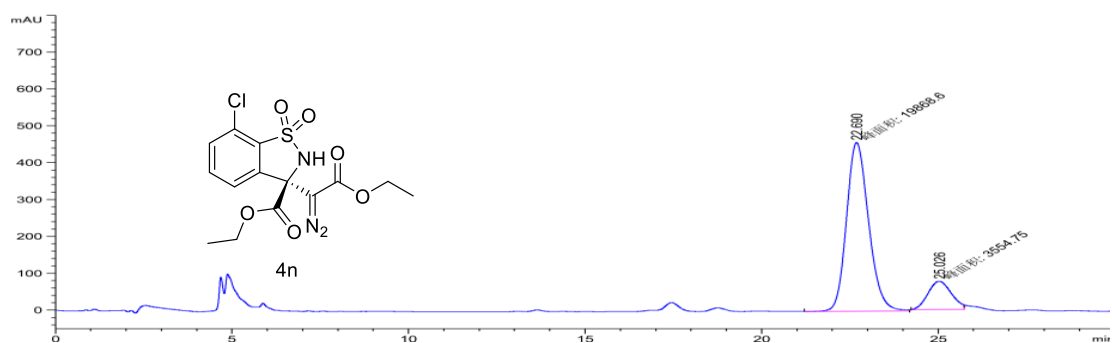

|   | Retention time (min) | Area (mAu + s) | %Area   |
|---|----------------------|----------------|---------|
| 1 | 22.690               | 1.98686e4      | 84.8239 |

|   |        |            |         |
|---|--------|------------|---------|
| 2 | 25.026 | 3554.74658 | 15.1761 |
|---|--------|------------|---------|

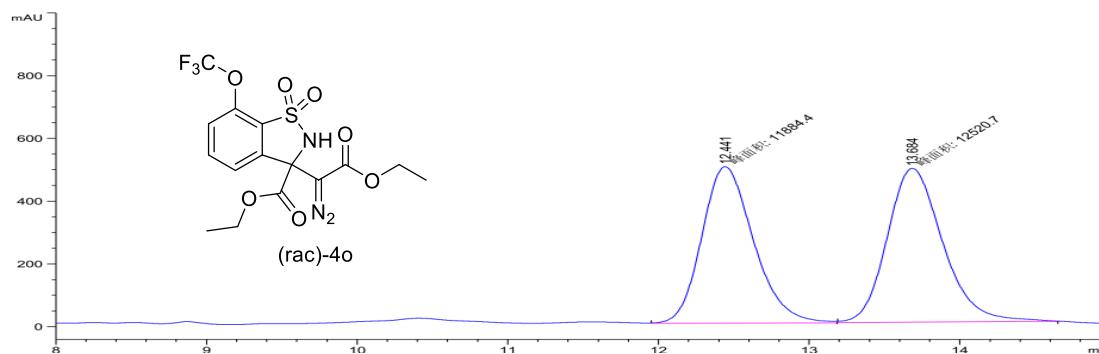

|   | Retention time (min) | Area (mAu + s) | %Area   |
|---|----------------------|----------------|---------|
| 1 | 12.441               | 1.18844e4      | 48.6964 |
| 2 | 13.684               | 1.25207e4      | 51.3036 |

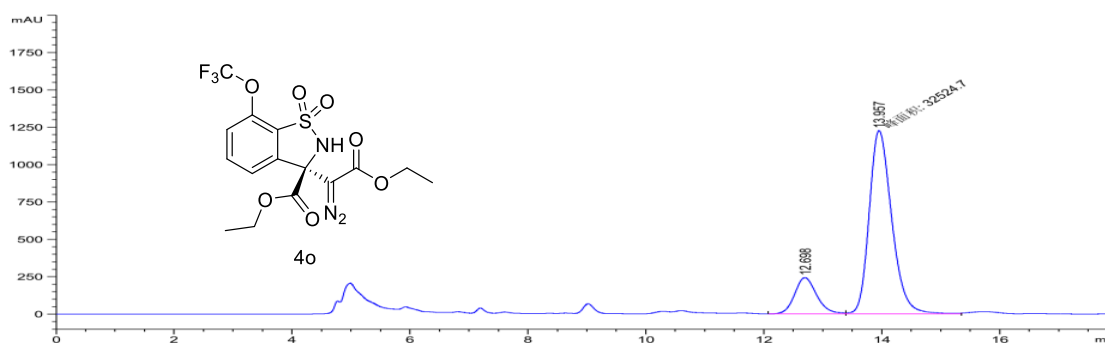

|   | Retention time (min) | Area (mAu + s) | %Area   |
|---|----------------------|----------------|---------|
| 1 | 12.698               | 6261.78613     | 16.1442 |
| 2 | 13.957               | 3.25247e4      | 83.8558 |

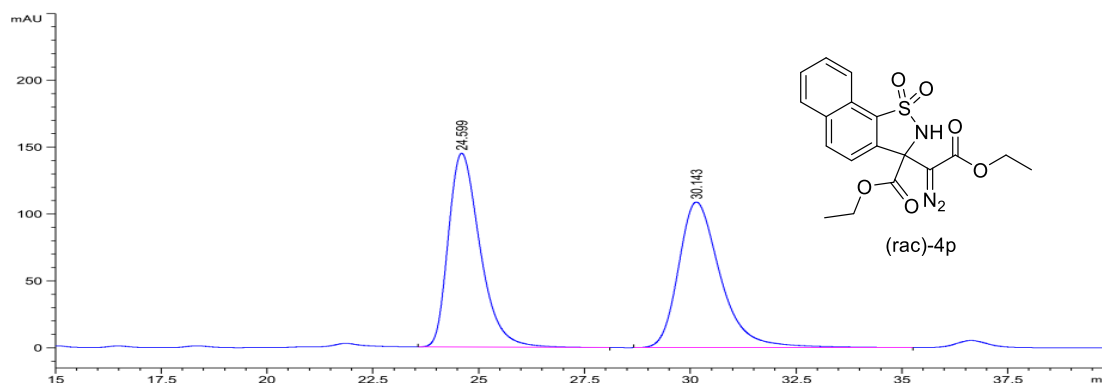

|   | Retention time (min) | Area (mAu + s) | %Area   |
|---|----------------------|----------------|---------|
| 1 | 24.599               | 7549.71533     | 50.2366 |
| 2 | 30.143               | 7478.61377     | 49.7634 |

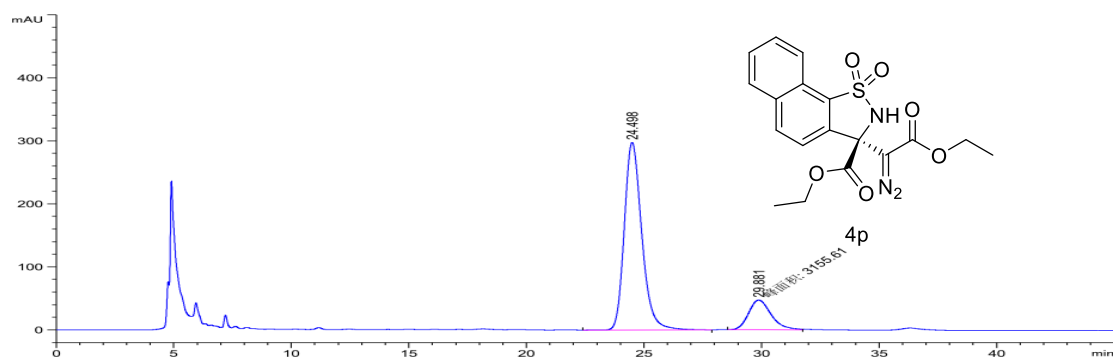

|   | Retention time (min) | Area (mAu + s) | %Area   |
|---|----------------------|----------------|---------|
| 1 | 24.498               | 1.53924e4      | 82.9868 |
| 2 | 29.881               | 3155.61377     | 17.0132 |

## 6. The analytical and spectral characterization data for the derivatives

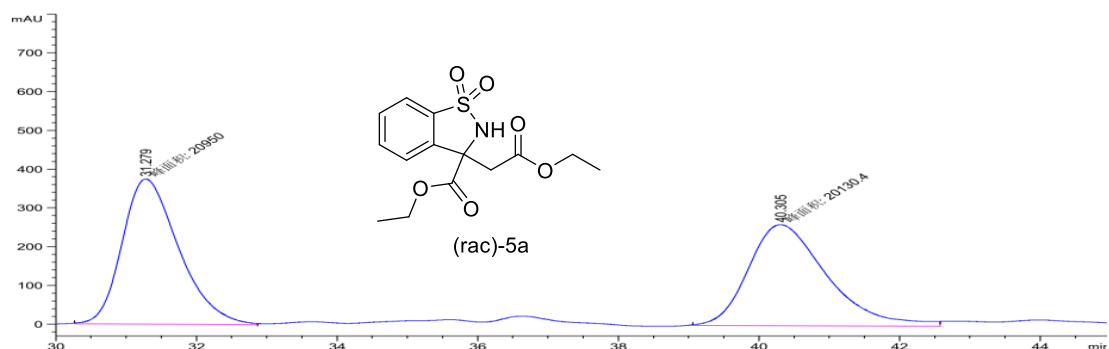

|   | Retention time (min) | Area (mAu + s) | %Area   |
|---|----------------------|----------------|---------|
| 1 | 31.279               | 2.09500e4      | 50.9976 |
| 2 | 40.305               | 2.01304e4      | 49.0024 |



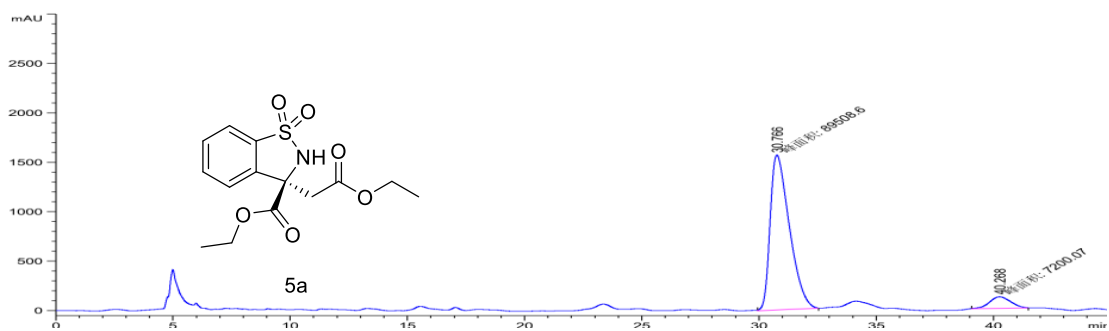

|   | Retention time (min) | Area (mAu + s) | %Area   |
|---|----------------------|----------------|---------|
| 1 | 30.766               | 8.9508e4       | 92.5549 |
| 2 | 40.268               | 7200.07373     | 7.4451  |

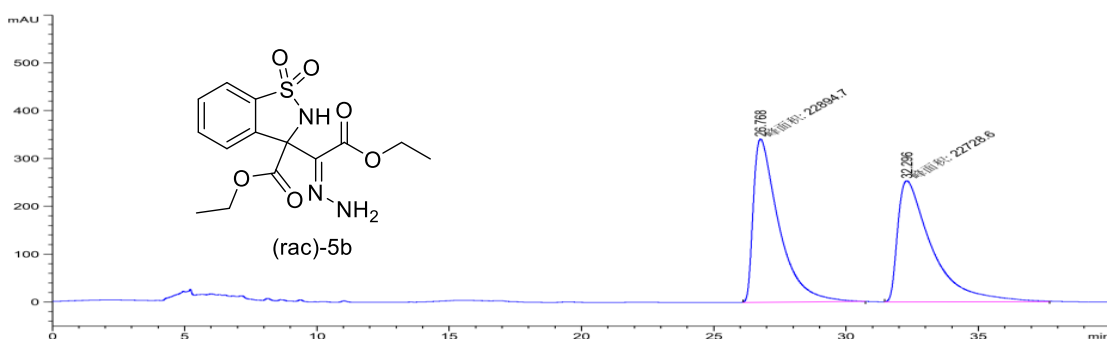

|   | Retention time (min) | Area (mAu + s) | %Area   |
|---|----------------------|----------------|---------|
| 1 | 26.768               | 2.28947e4      | 50.1819 |
| 2 | 32.296               | 2,27286e4      | 49.8181 |

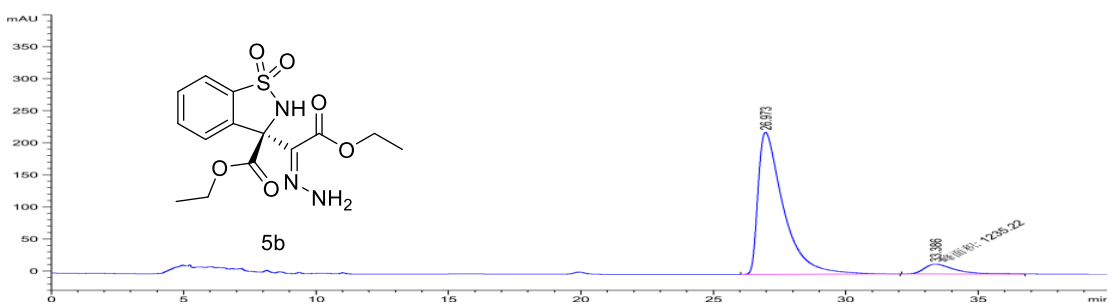

|   | Retention time (min) | Area (mAu + s) | %Area   |
|---|----------------------|----------------|---------|
| 1 | 26.973               | 1.47281e4      | 92.2621 |
| 2 | 33.386               | 1235.22302     | 7.7379  |

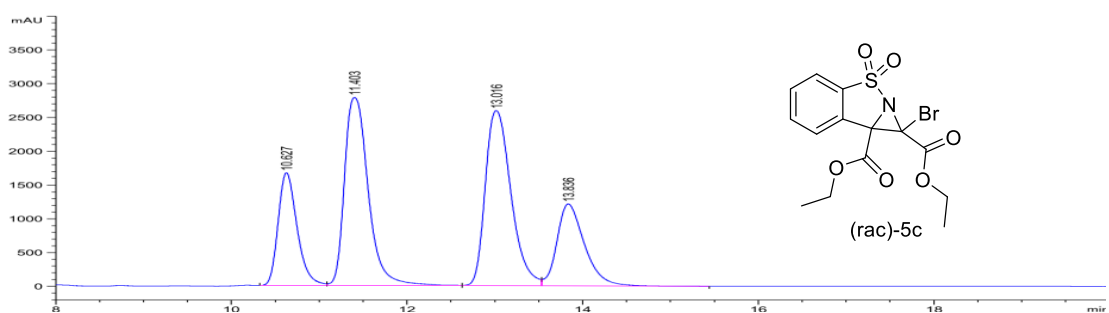

|   | Retention time (min) | Area (mAu + s) | %Area   |
|---|----------------------|----------------|---------|
| 1 | 10.627               | 2.50178e4      | 16.0581 |
| 2 | 11.403               | 5.20874e4      | 33.4334 |
| 3 | 13.016               | 5.24056e4      | 33.6376 |
| 4 | 13.836               | 2.62840e4      | 16.8709 |

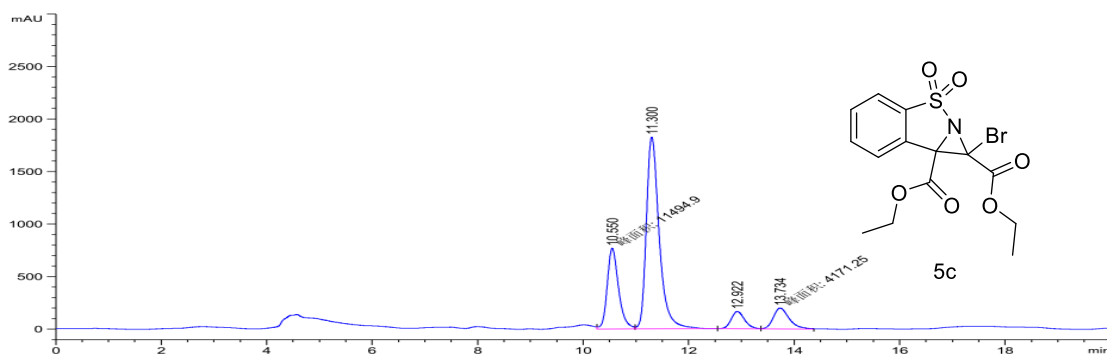

|   | Retention time (min) | Area (mAu + s) | %Area   |
|---|----------------------|----------------|---------|
| 1 | 10.550               | 1.14949e4      | 23.1973 |
| 2 | 11.300               | 3.10101e4      | 62.5802 |
| 3 | 12.922               | 2876.36304     | 5.8047  |
| 4 | 13.734               | 4171.25391     | 8.4178  |

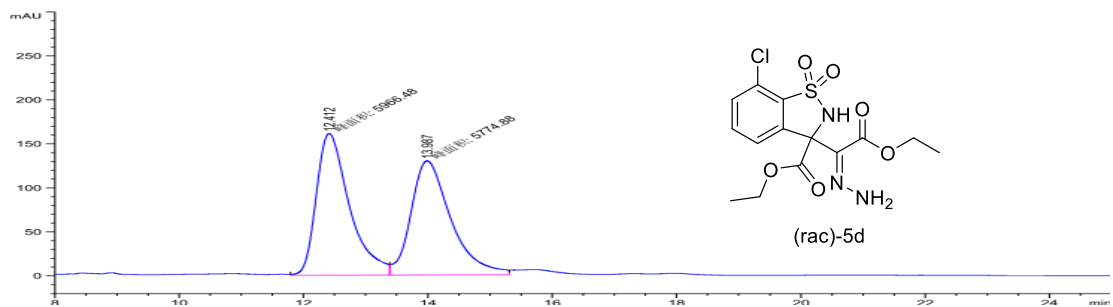

|   | Retention time (min) | Area (mAu + s) | %Area   |
|---|----------------------|----------------|---------|
| 1 | 12.412               | 5966.47900     | 50.8159 |
| 2 | 13.987               | 5774.88428     | 49.1841 |

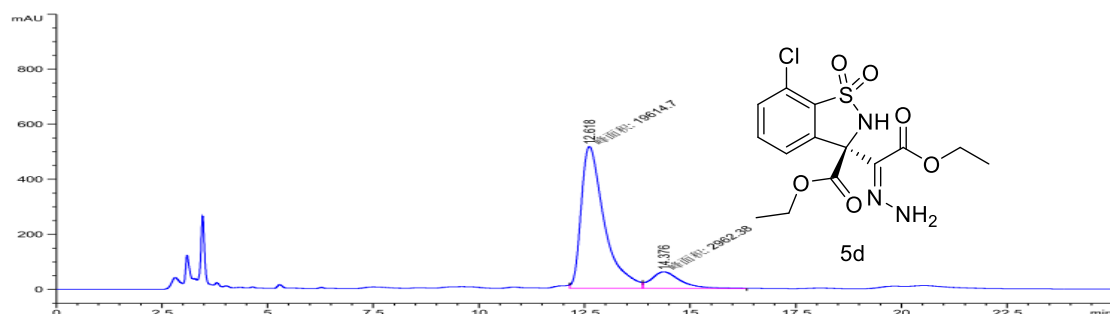

|   | Retention time (min) | Area (mAu + s) | %Area   |
|---|----------------------|----------------|---------|
| 1 | 12.618               | 1.96147e4      | 86.8788 |
| 2 | 14.376               | 2962.38110     | 13.1212 |

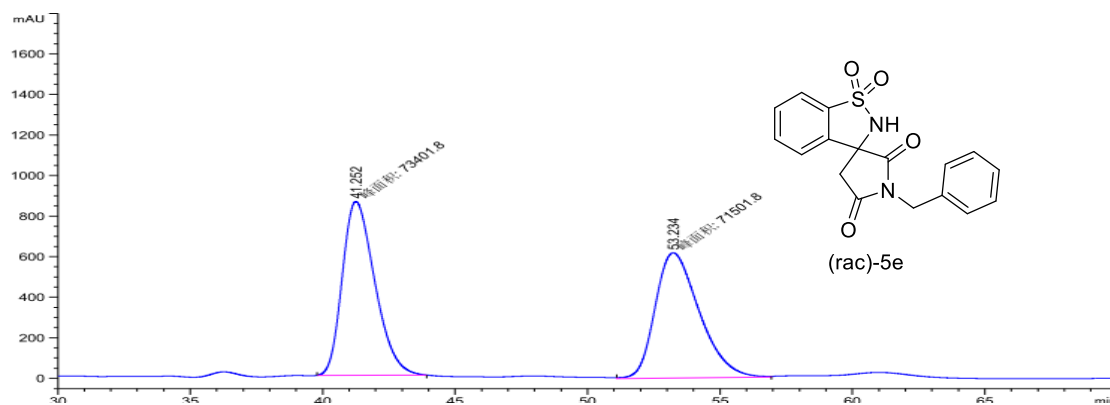

|   | Retention time (min) | Area (mAu + s) | %Area   |
|---|----------------------|----------------|---------|
| 1 | 41.252               | 7.34018e4      | 50.6556 |
| 2 | 53.234               | 7.15018e4      | 49.3444 |

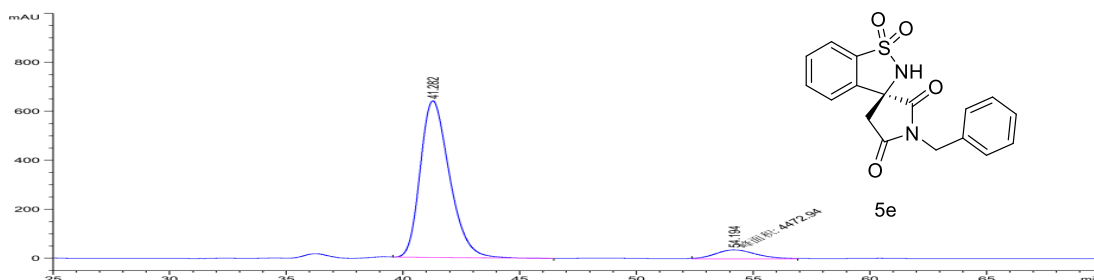

|   | Retention time (min) | Area (mAu + s) | %Area   |
|---|----------------------|----------------|---------|
| 1 | 41.282               | 5.56462e4      | 92.5599 |
| 2 | 54.194               | 4472.94189     | 7.4401  |

## 7. X-ray crystal structure for 5d

CCDC 1580590 (**5d**) contain the supplementary crystallographic data of adducts for this paper. These data can be obtained free of charge from The Cambridge Crystallographic Data Centre via [www.ccdc.cam.ac.uk/data\\_request/cif](http://www.ccdc.cam.ac.uk/data_request/cif).

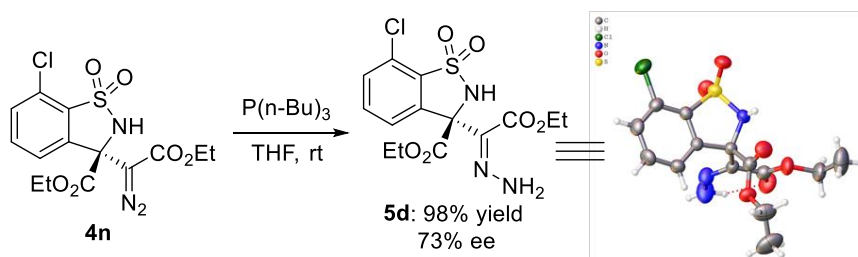

**Table 1 Crystal data and structure refinement for 5d.**

|                                      |                                                                   |
|--------------------------------------|-------------------------------------------------------------------|
| Identification code                  | <b>5d</b>                                                         |
| Empirical formula                    | C <sub>14</sub> H <sub>16</sub> ClN <sub>3</sub> O <sub>6</sub> S |
| Formula weight                       | 389.81                                                            |
| Temperature/K                        | 293.15                                                            |
| Crystal system                       | triclinic                                                         |
| Space group                          | P-1                                                               |
| a/Å                                  | 7.8621(4)                                                         |
| b/Å                                  | 10.1290(5)                                                        |
| c/Å                                  | 12.5926(5)                                                        |
| α/°                                  | 70.829(4)                                                         |
| β/°                                  | 76.104(4)                                                         |
| γ/°                                  | 67.503(5)                                                         |
| Volume/Å <sup>3</sup>                | 867.55(8)                                                         |
| Z                                    | 2                                                                 |
| ρ <sub>calc</sub> /g/cm <sup>3</sup> | 1.492                                                             |
| μ/mm <sup>-1</sup>                   | 0.377                                                             |

|                                             |                                                                |
|---------------------------------------------|----------------------------------------------------------------|
| F(000)                                      | 404.0                                                          |
| Crystal size/mm <sup>3</sup>                | 0.3 × 0.25 × 0.02                                              |
| Radiation                                   | MoK $\alpha$ ( $\lambda$ = 0.71073)                            |
| 2 $\Theta$ range for data collection/°      | 5.834 to 52.738                                                |
| Index ranges                                | -9 ≤ h ≤ 9, -12 ≤ k ≤ 12, -15 ≤ l ≤ 15                         |
| Reflections collected                       | 7194                                                           |
| Independent reflections                     | 3544 [ $R_{\text{int}}$ = 0.0194, $R_{\text{sigma}}$ = 0.0424] |
| Data/restraints/parameters                  | 3544/0/240                                                     |
| Goodness-of-fit on $F^2$                    | 1.098                                                          |
| Final R indexes [ $I \geq 2\sigma(I)$ ]     | $R_1$ = 0.0492, $wR_2$ = 0.1246                                |
| Final R indexes [all data]                  | $R_1$ = 0.0752, $wR_2$ = 0.1343                                |
| Largest diff. peak/hole / e Å <sup>-3</sup> | 0.67/-0.50                                                     |

## 8. NMR Spectra of the Compounds 4-5

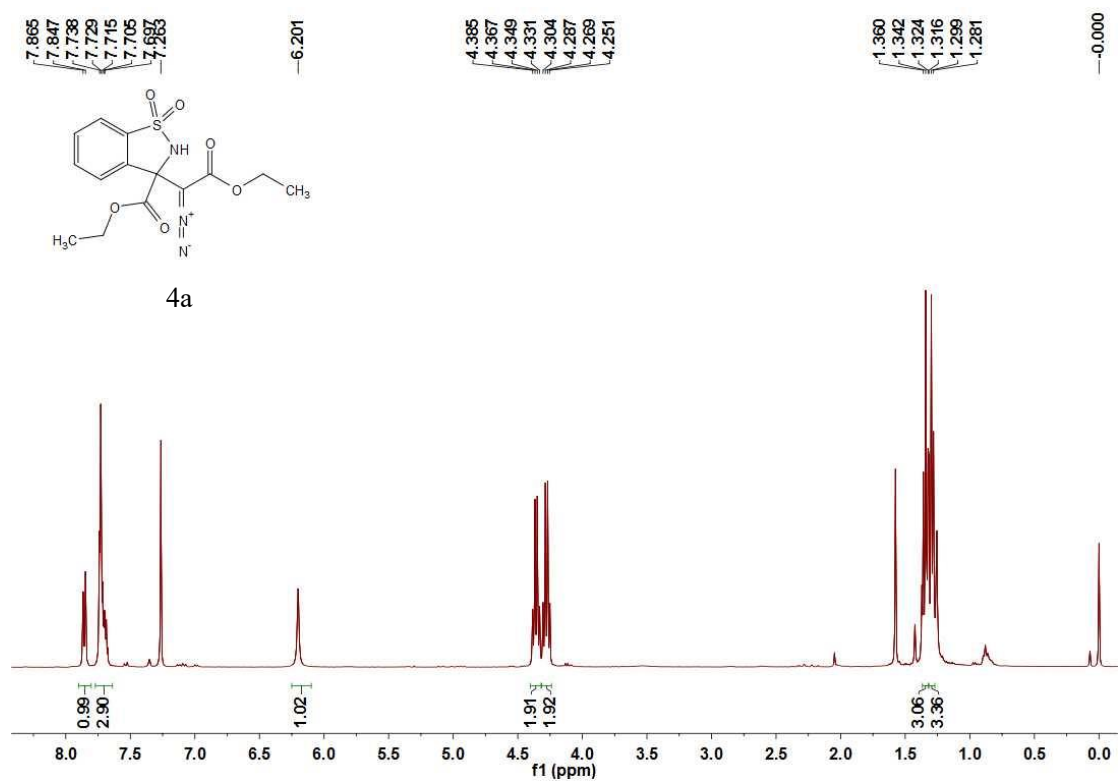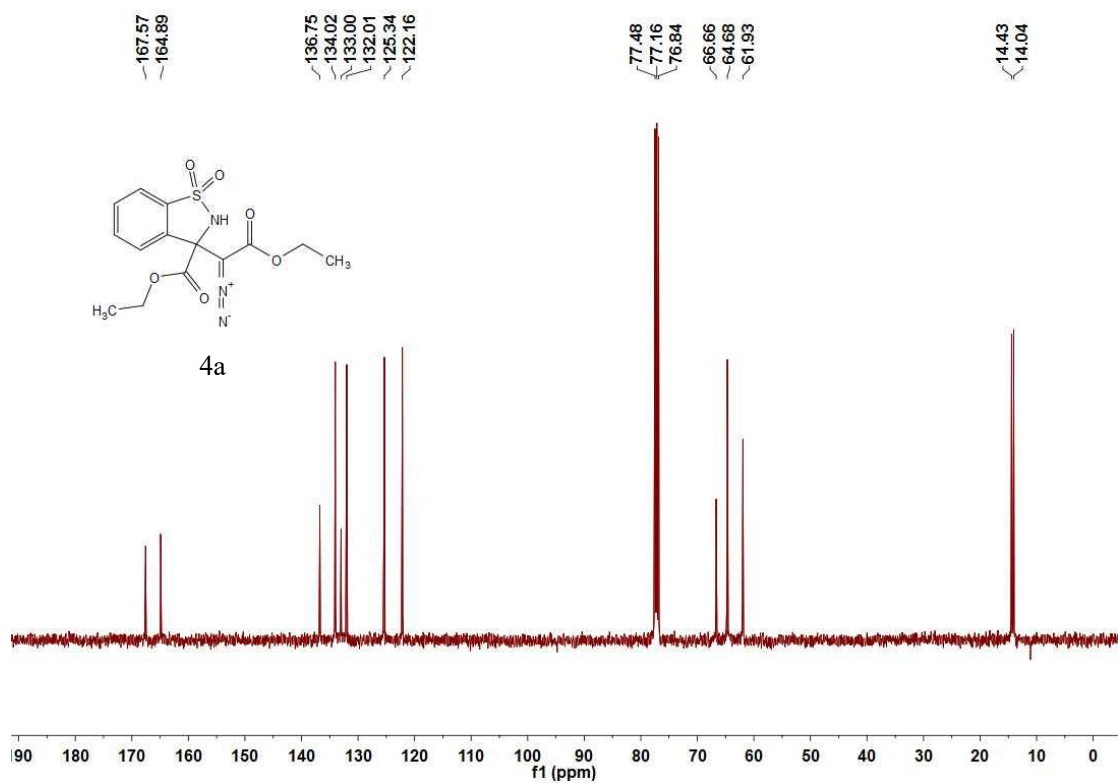

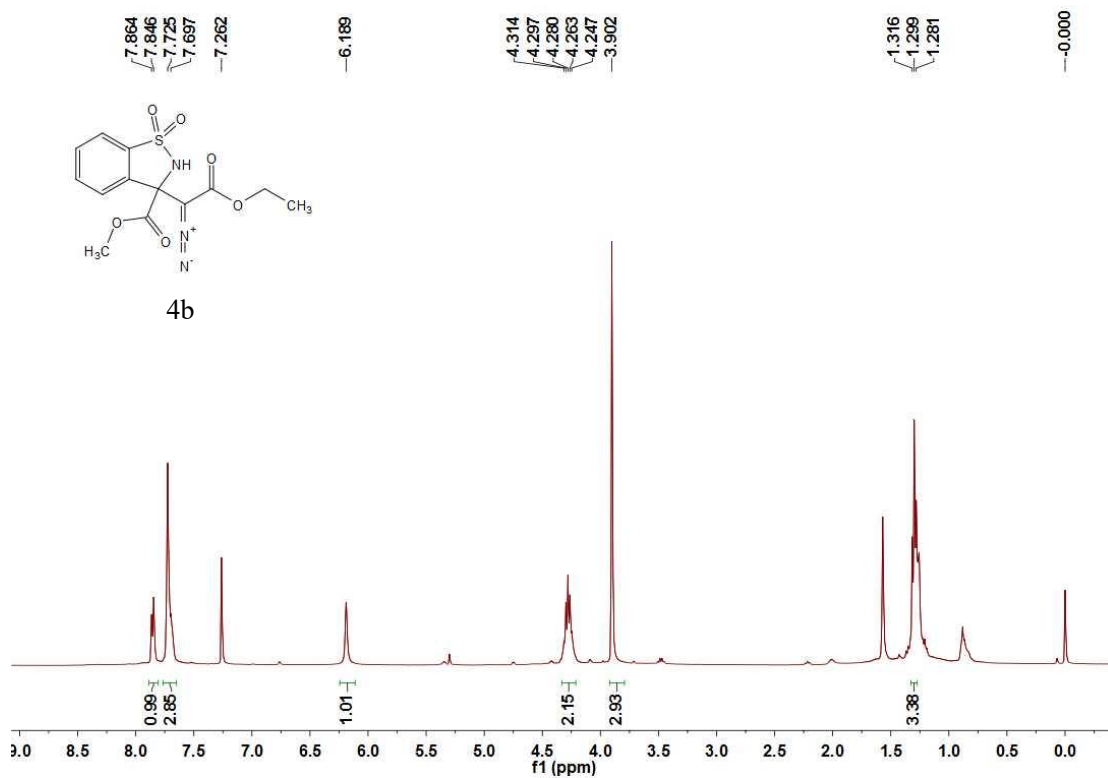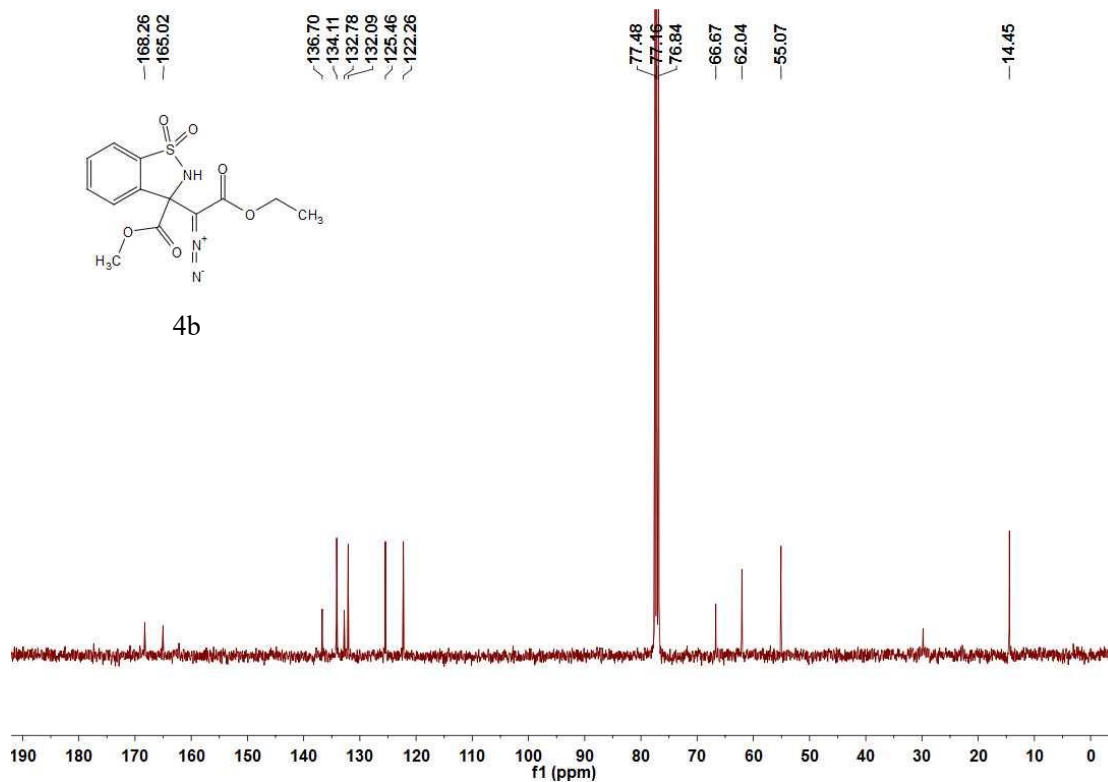

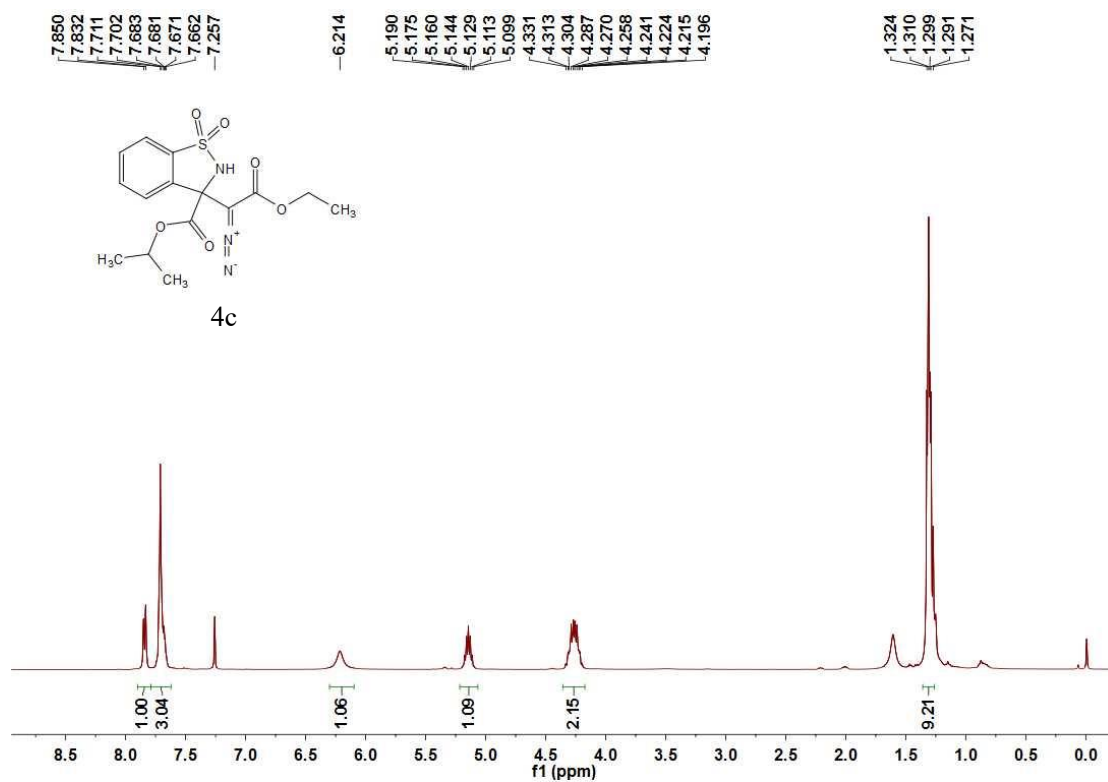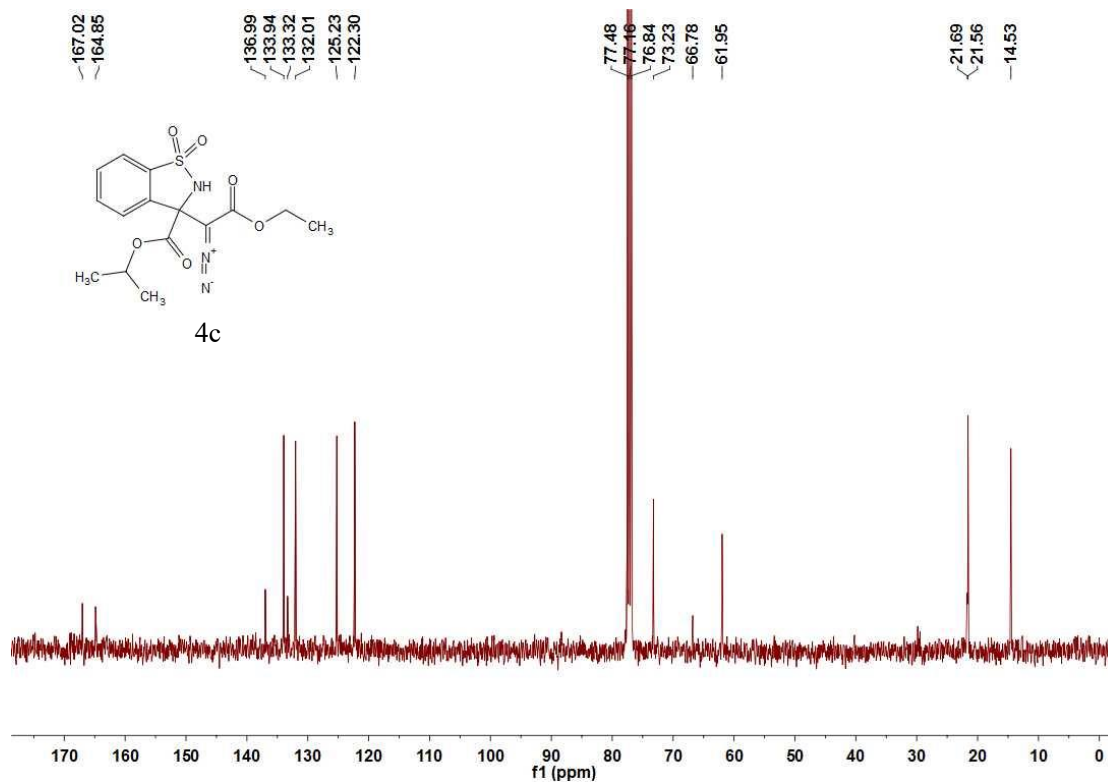



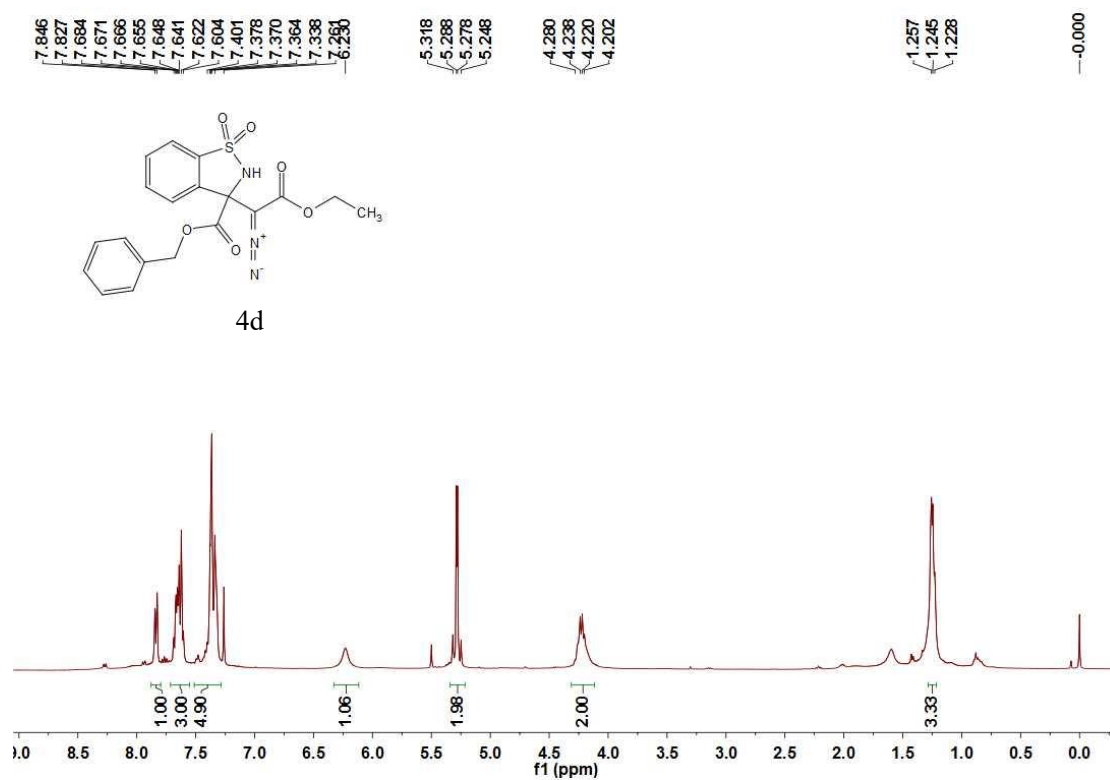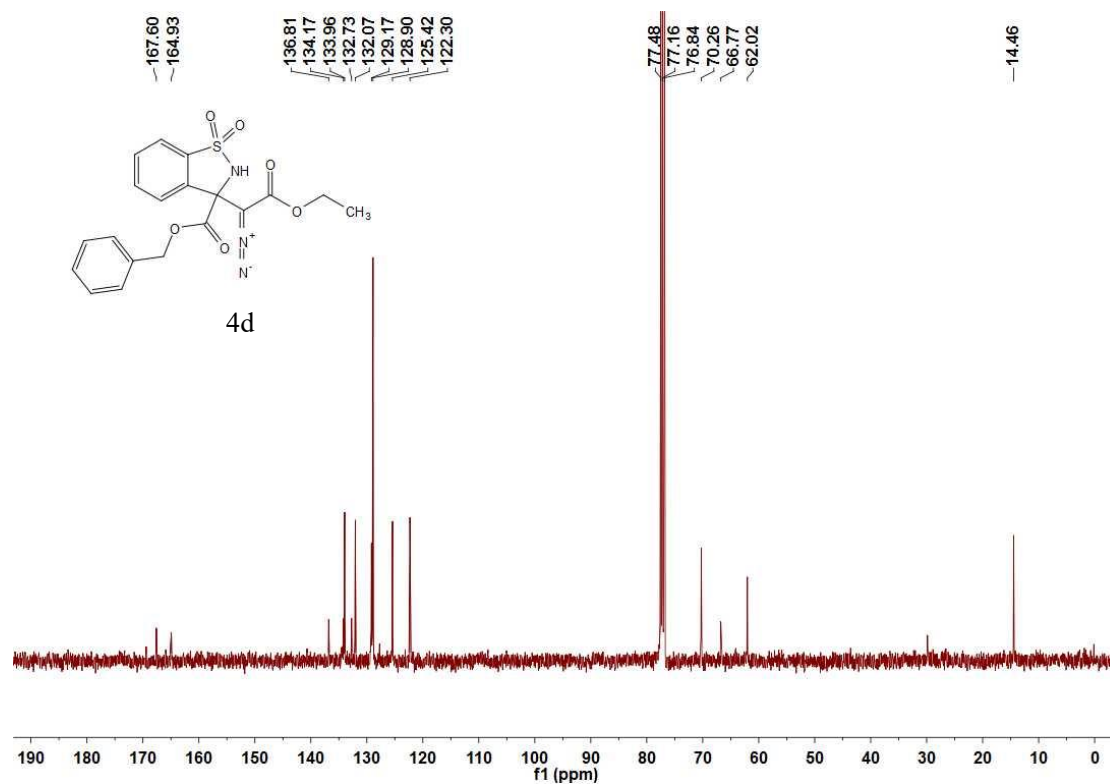

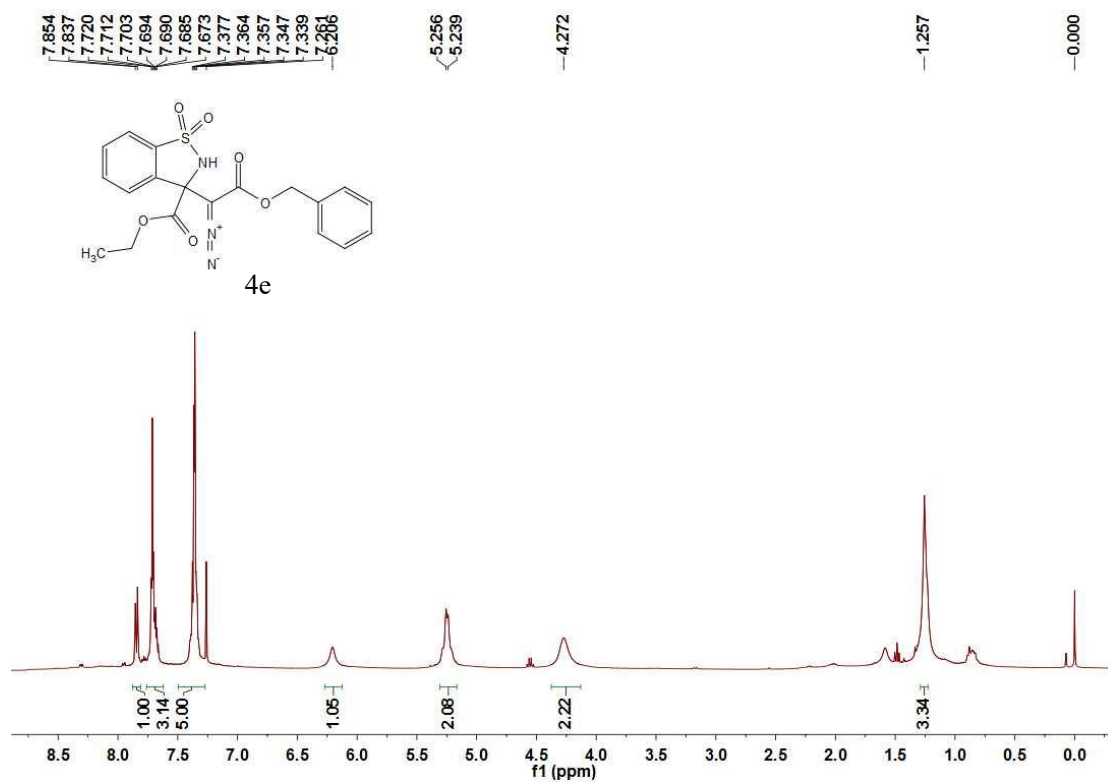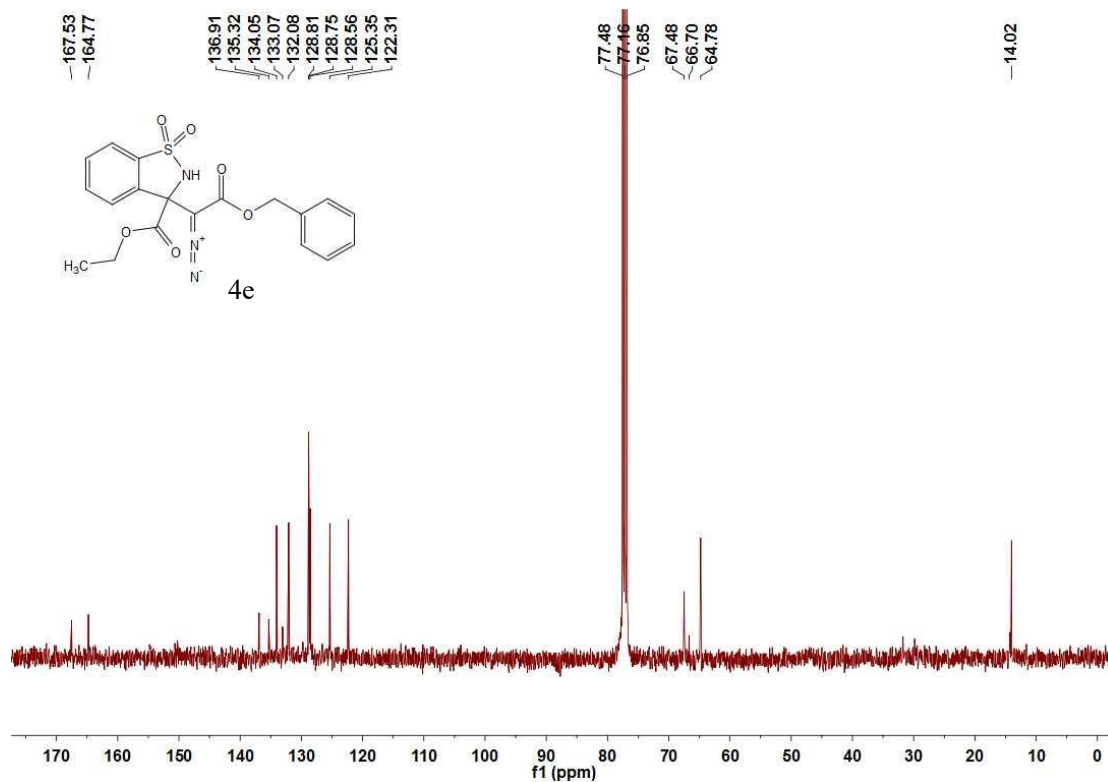

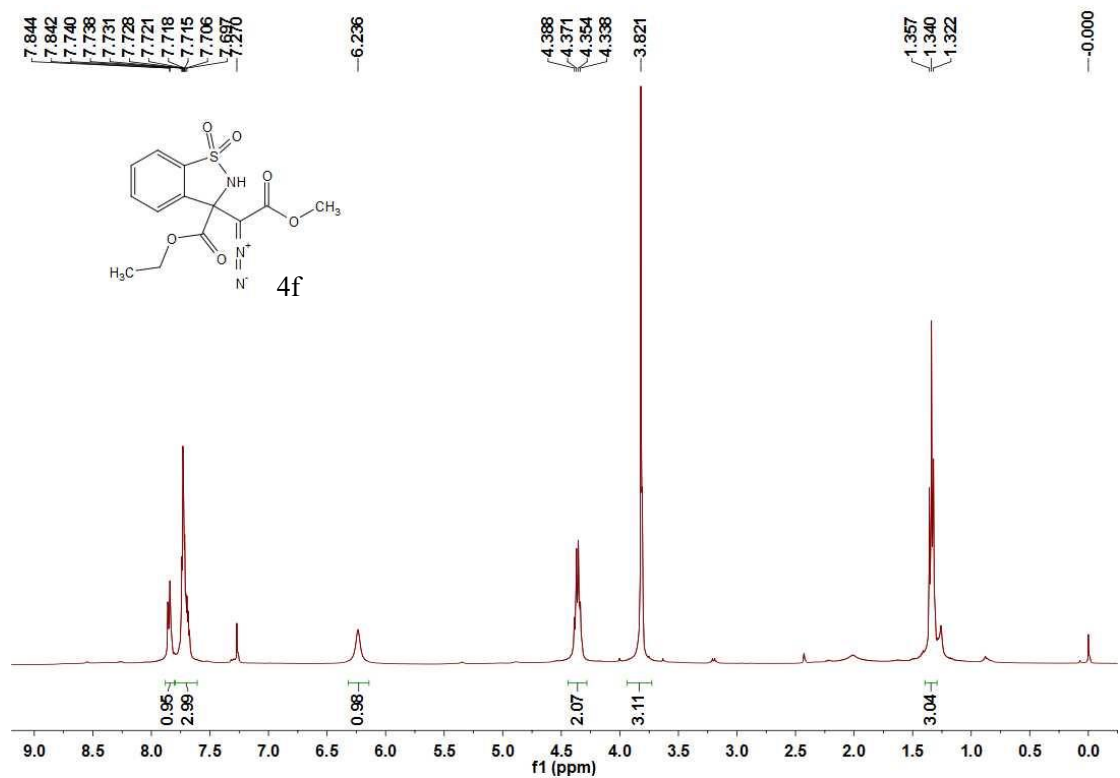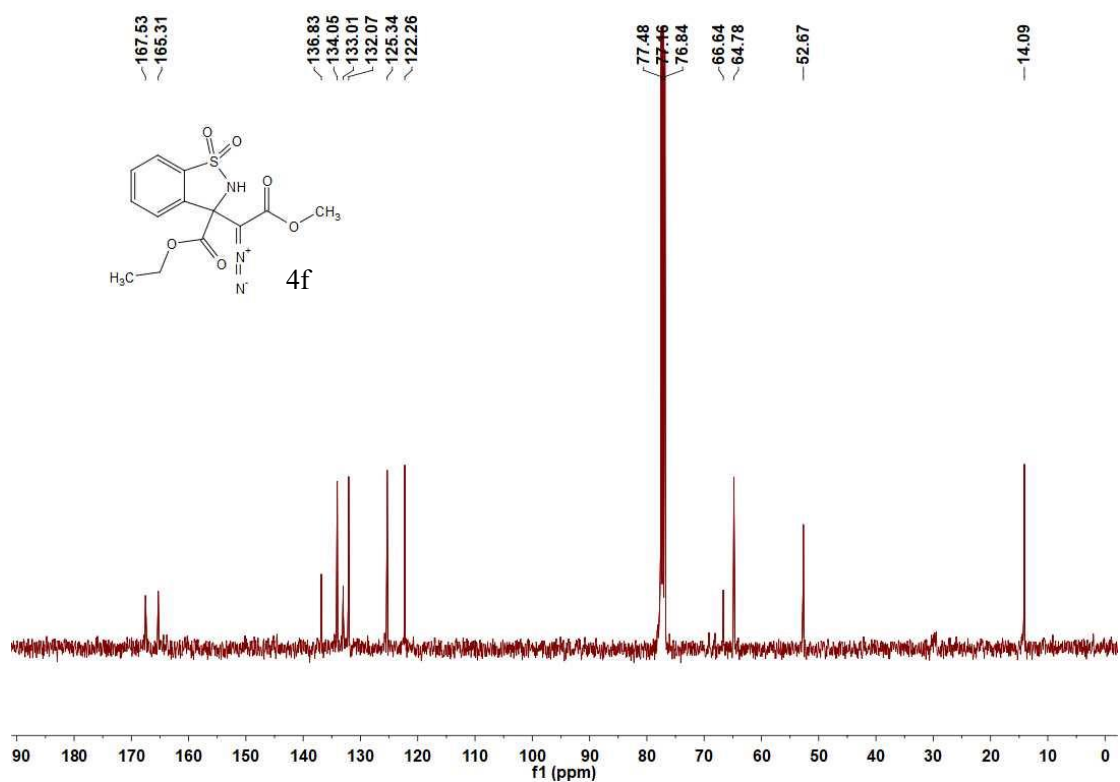

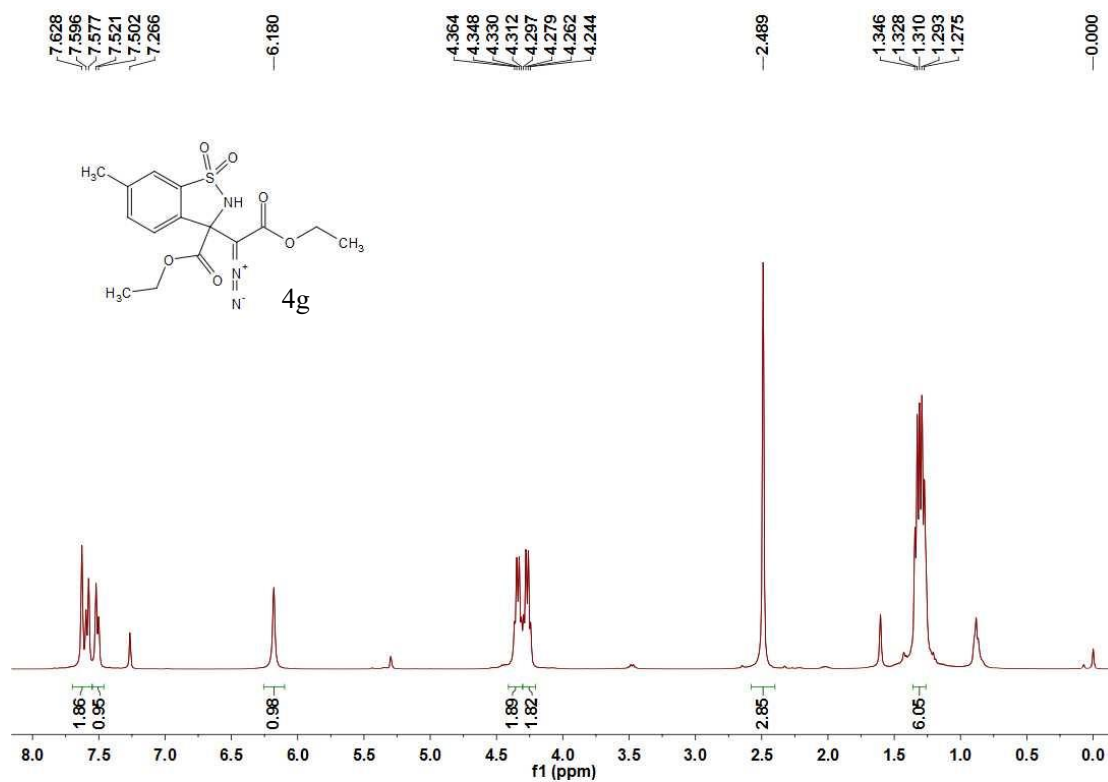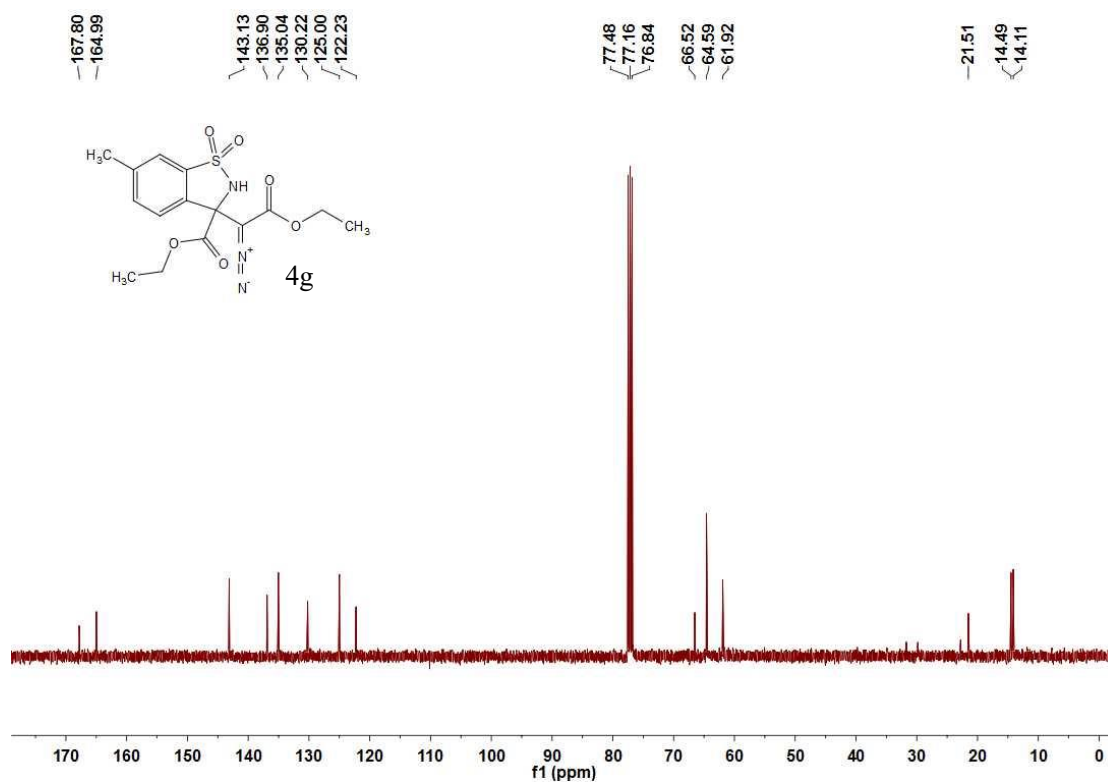

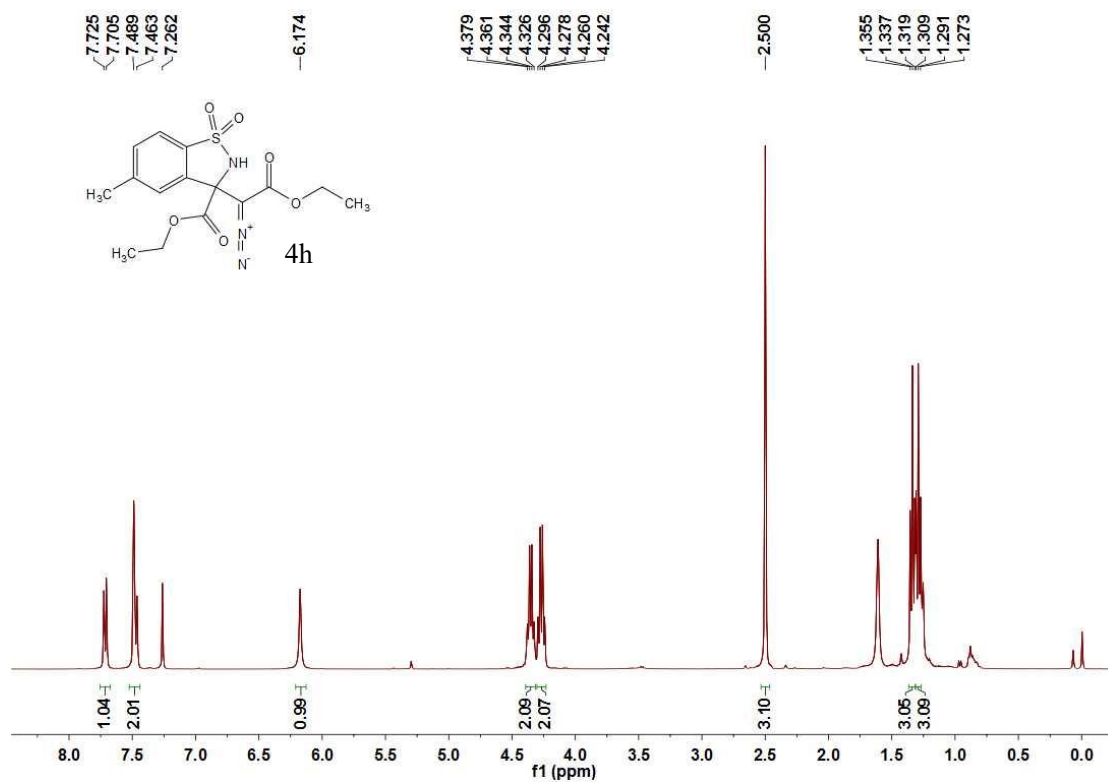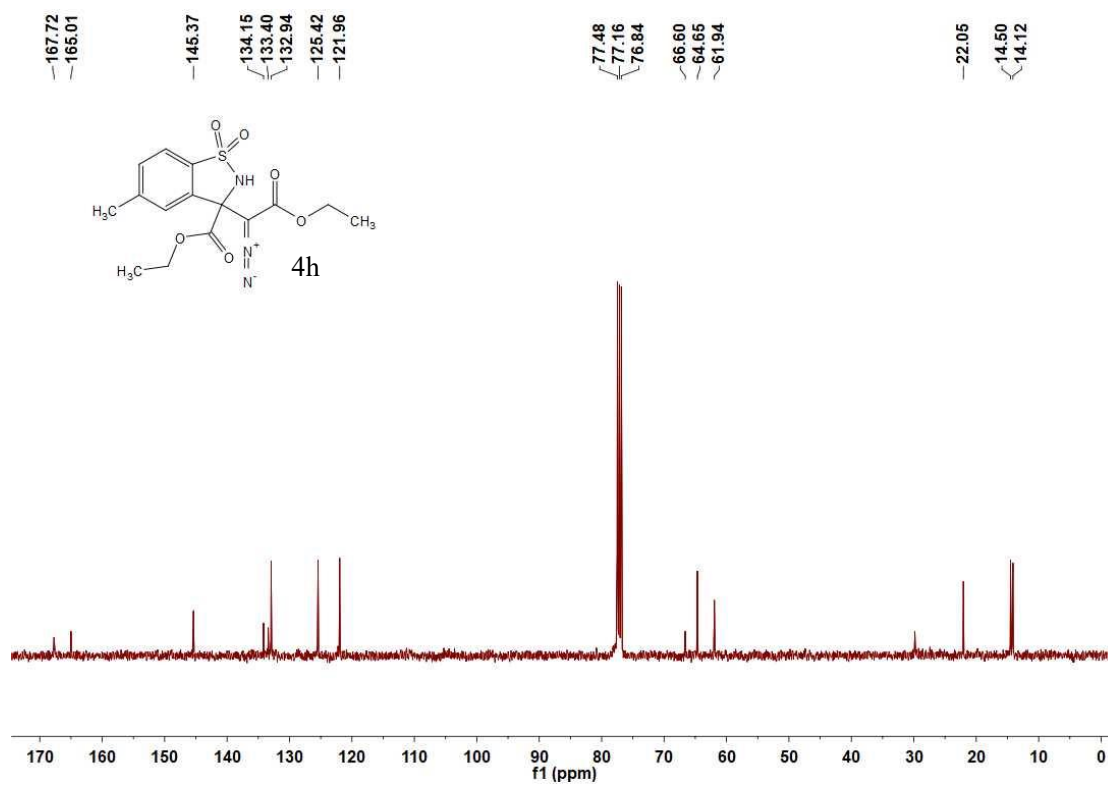

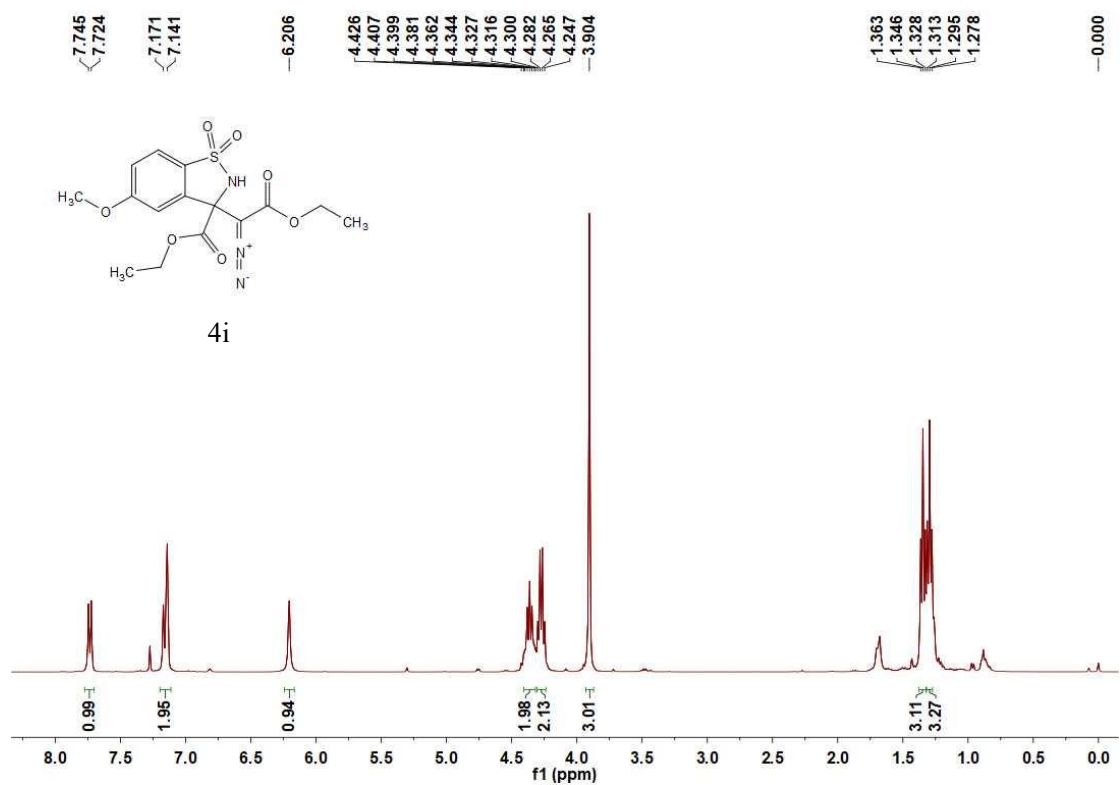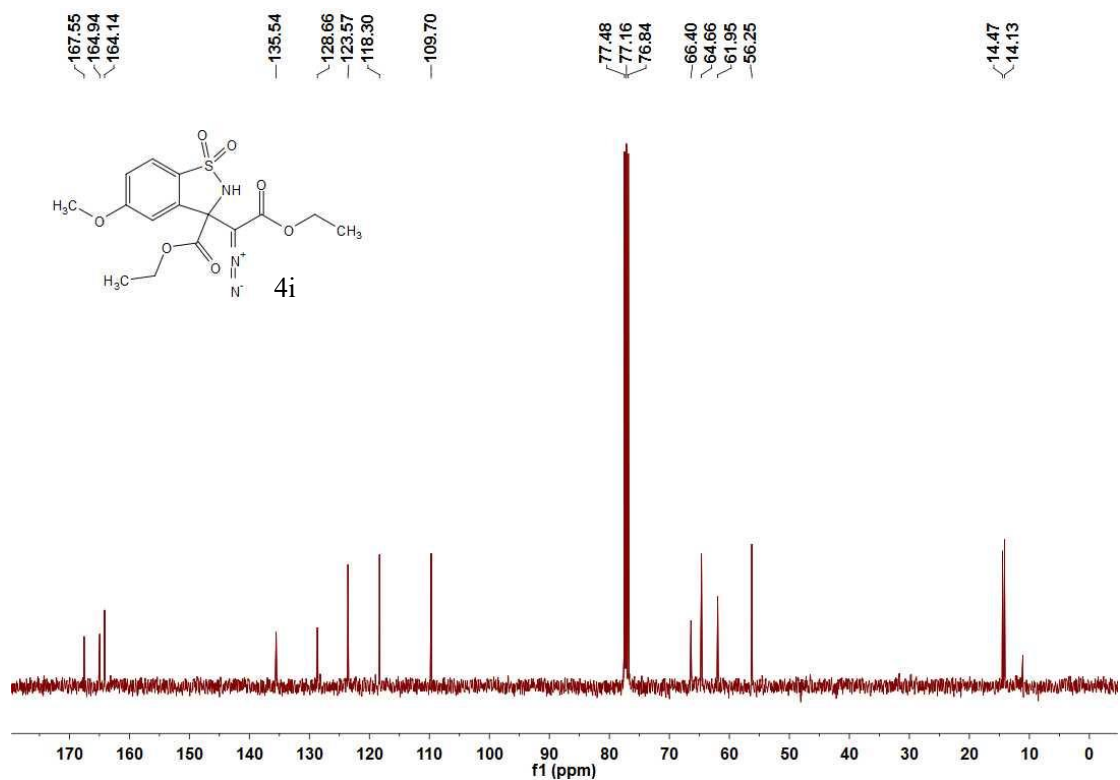

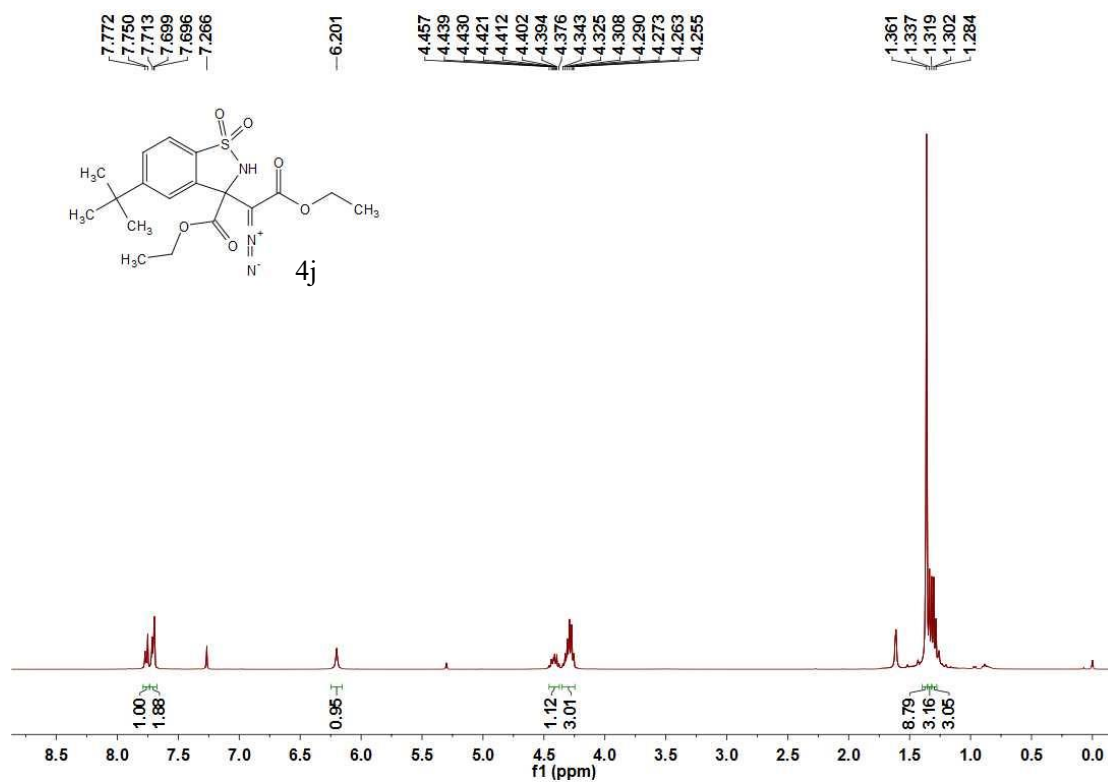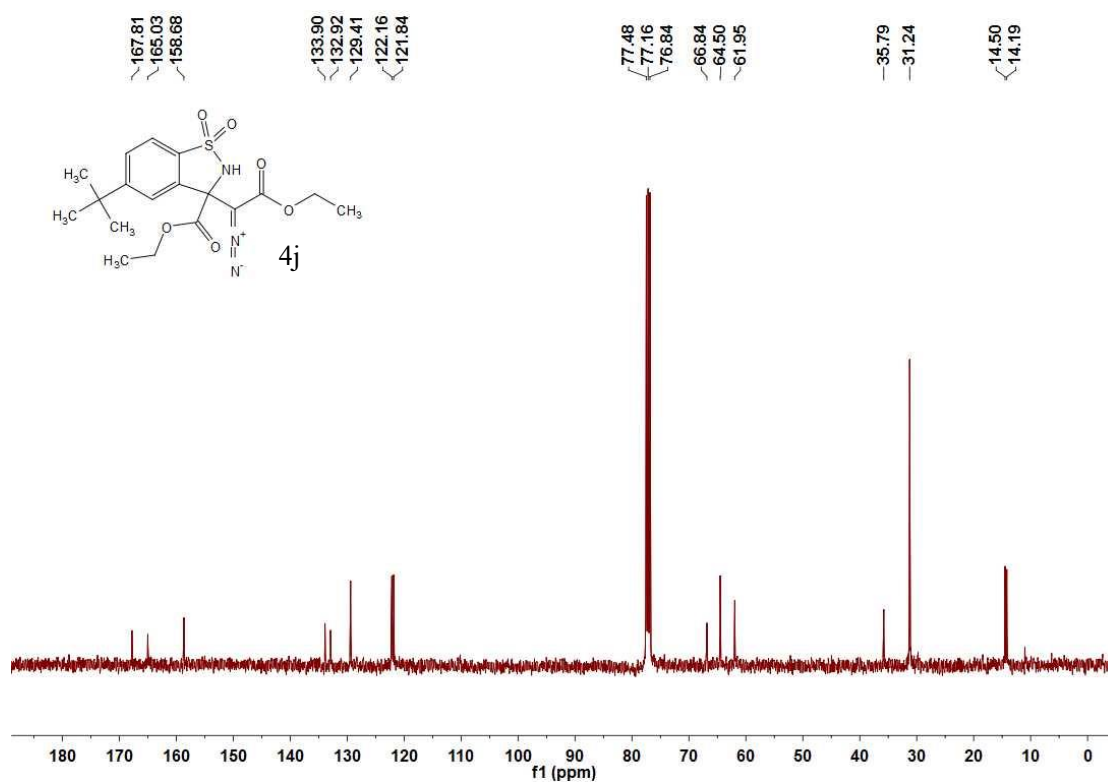

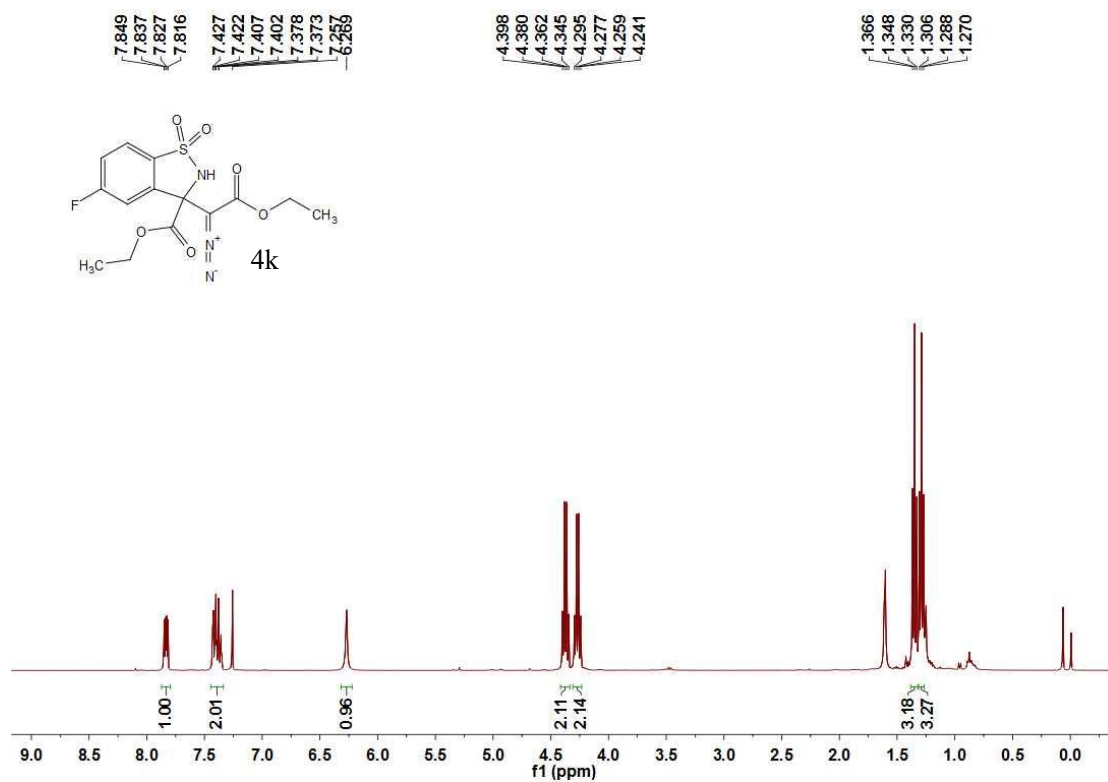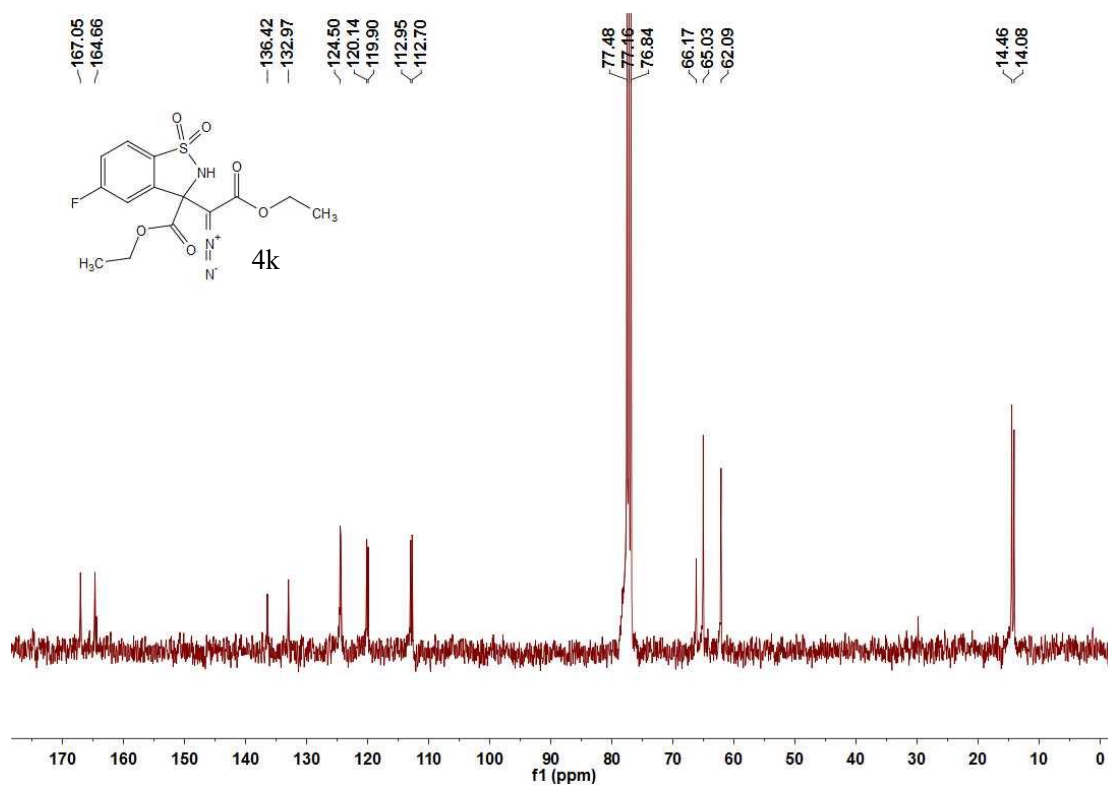



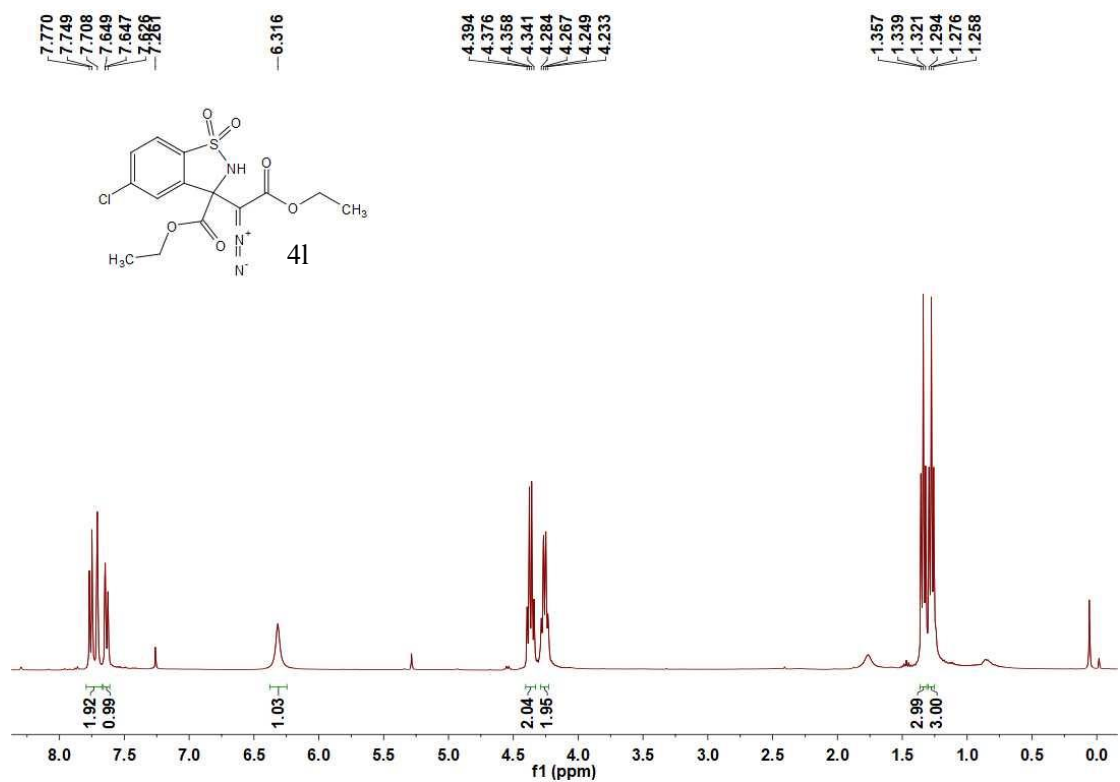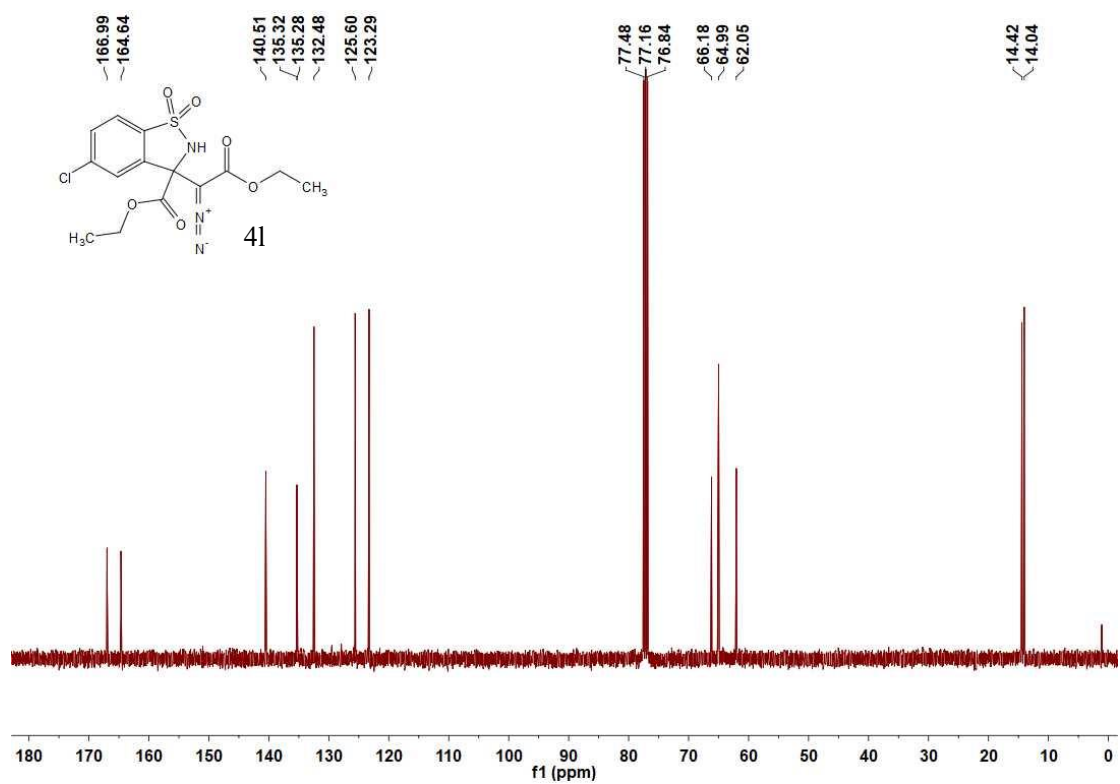

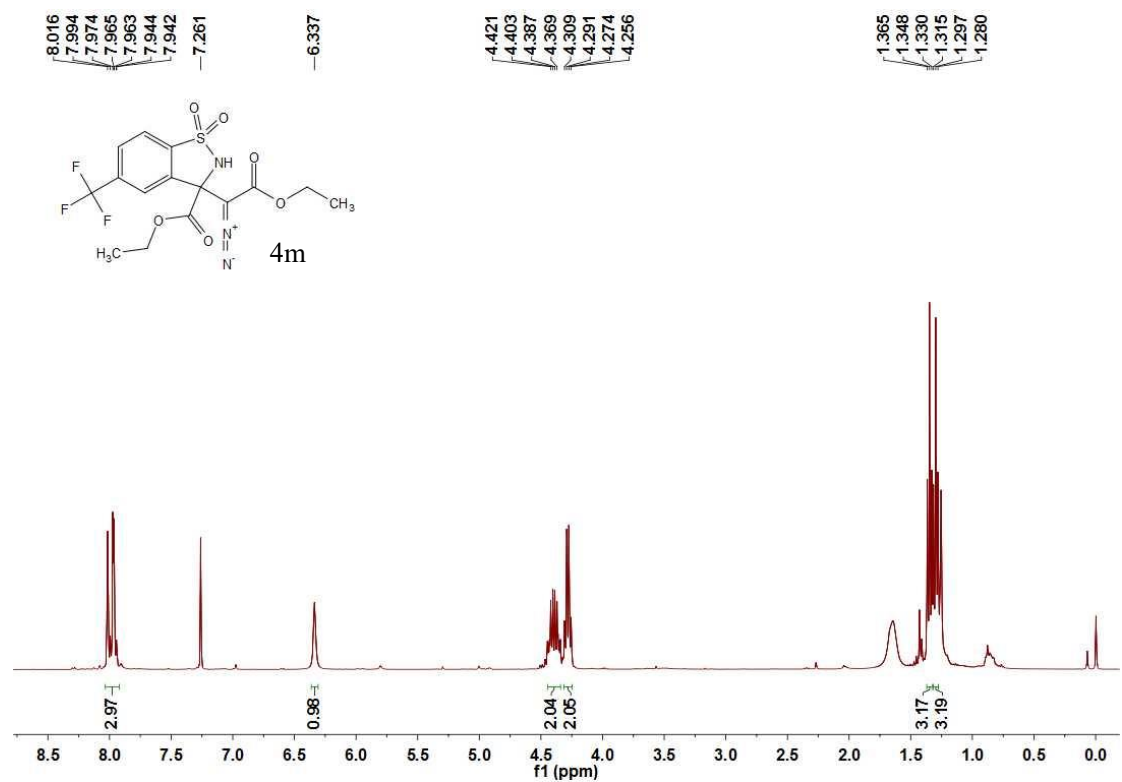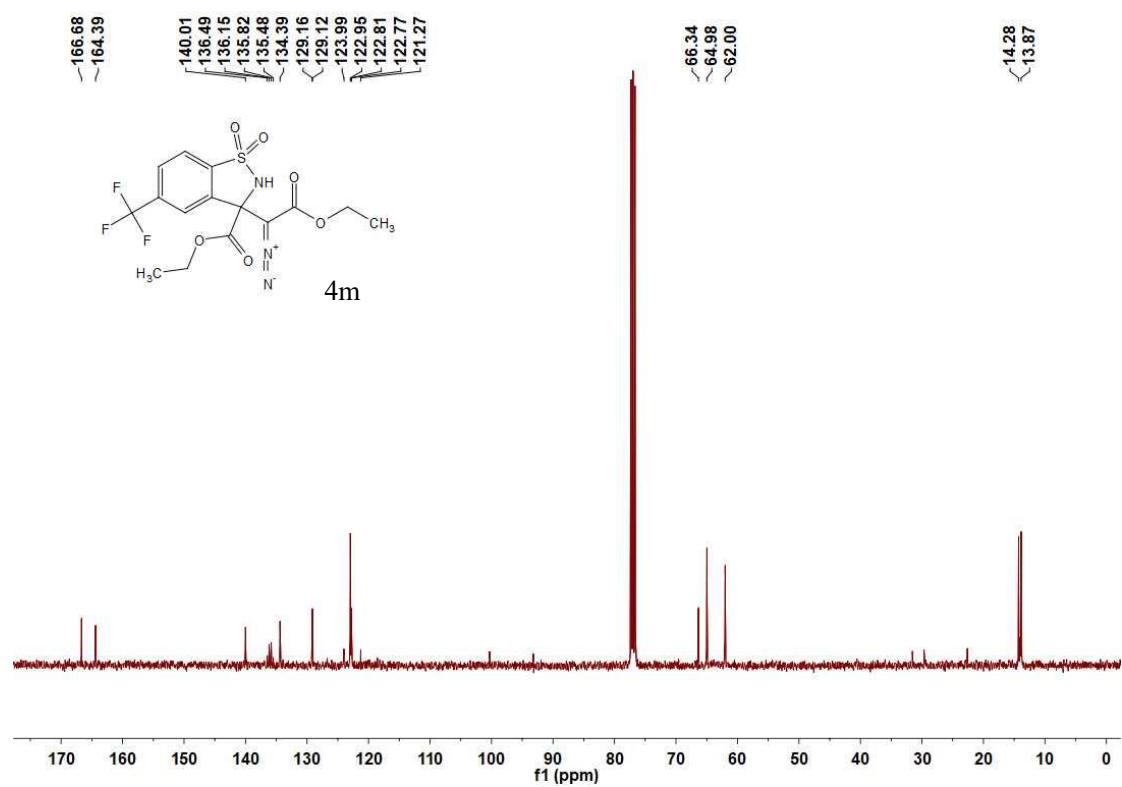

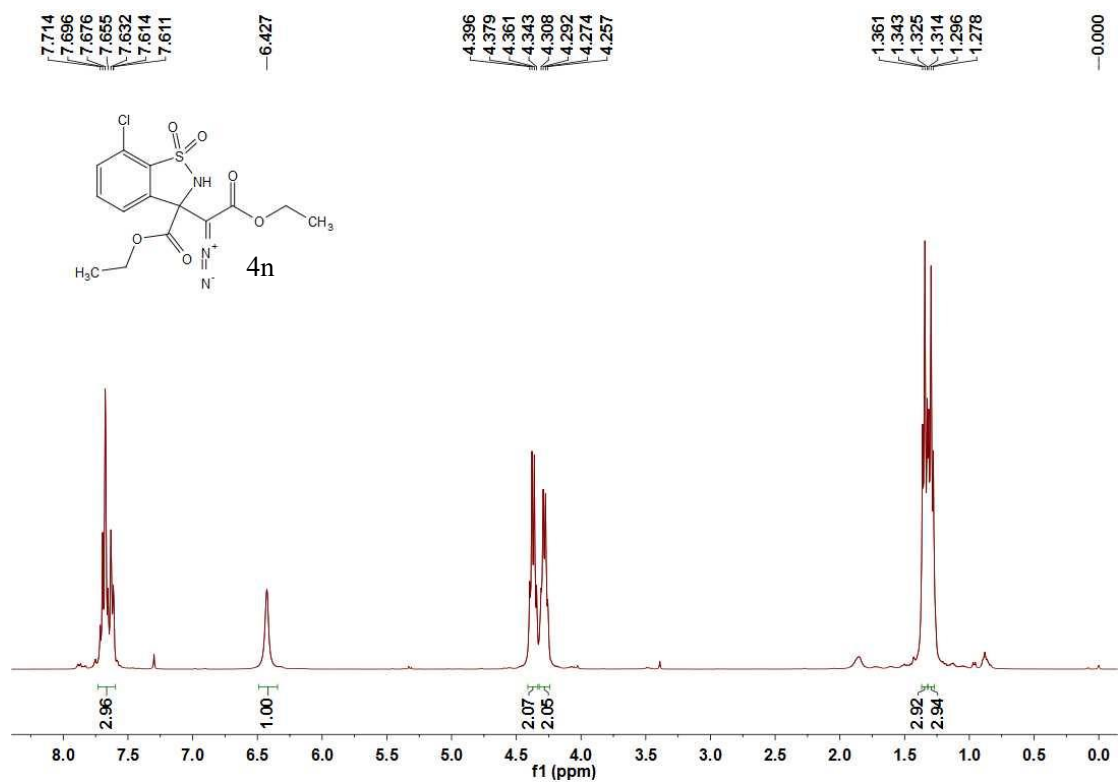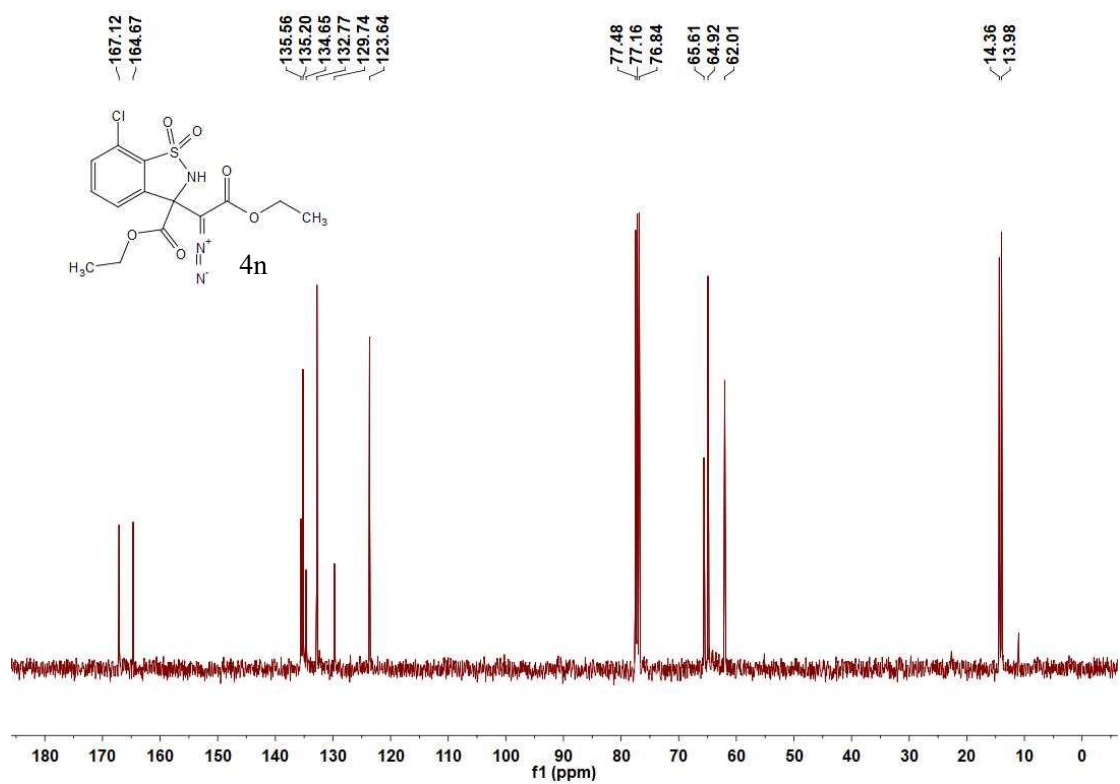

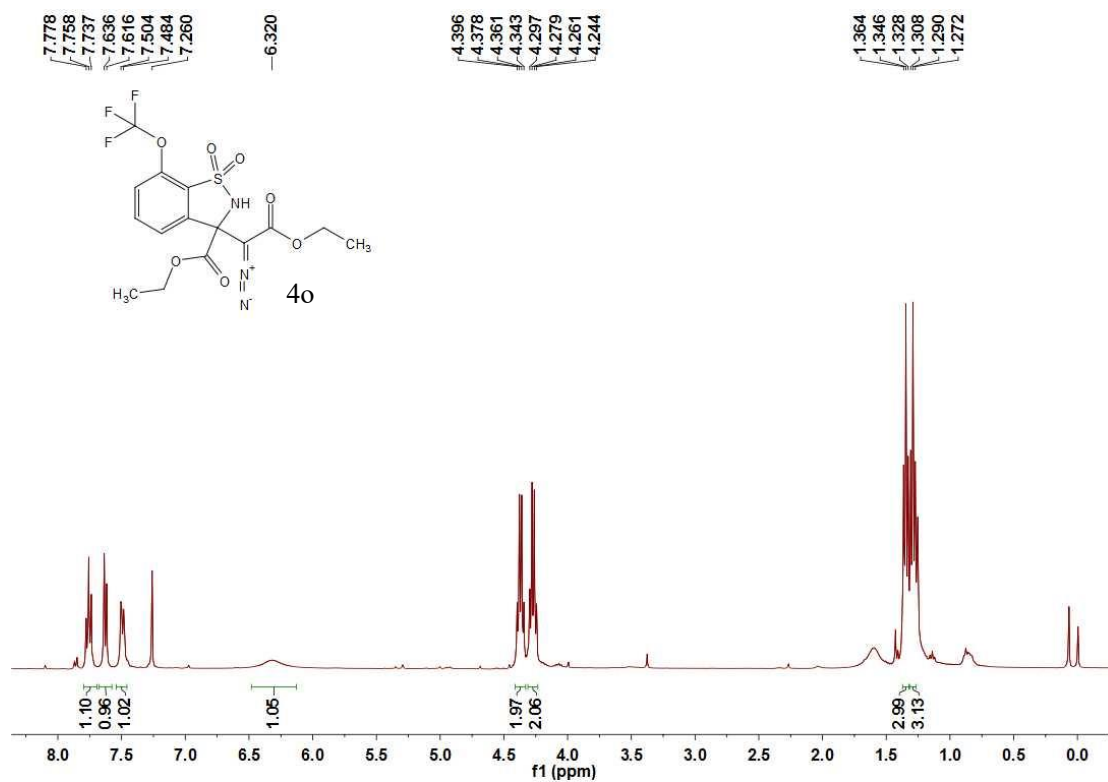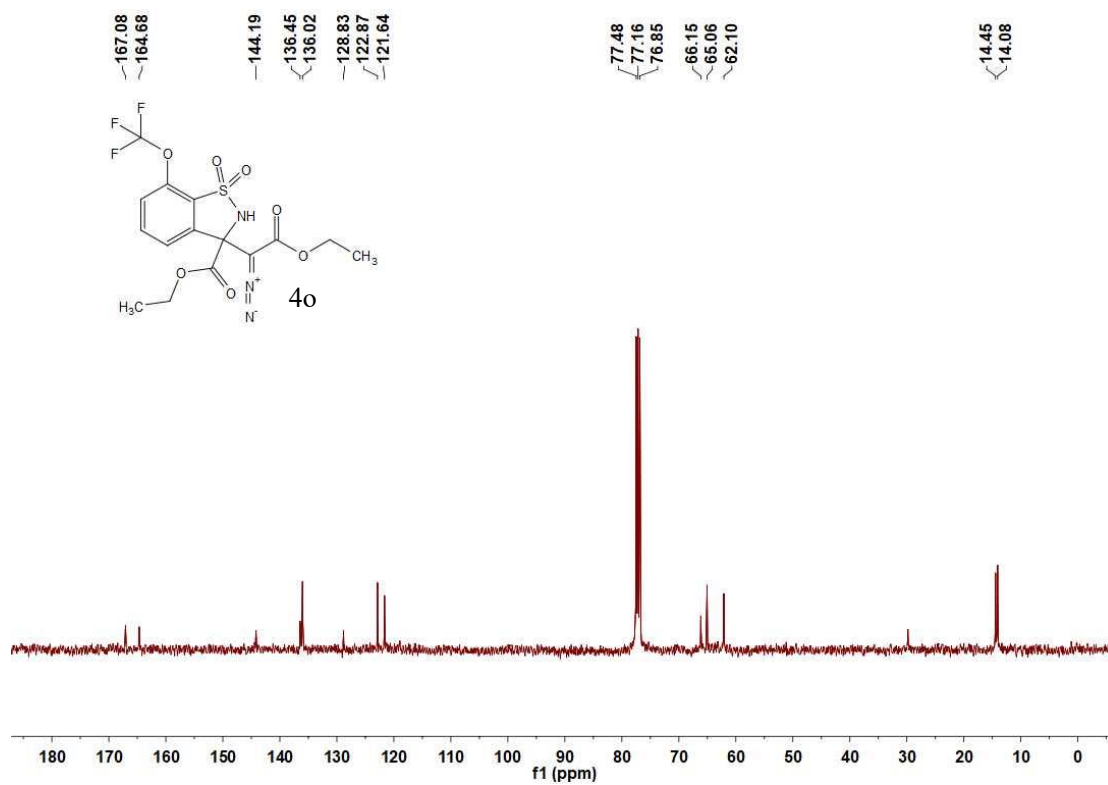

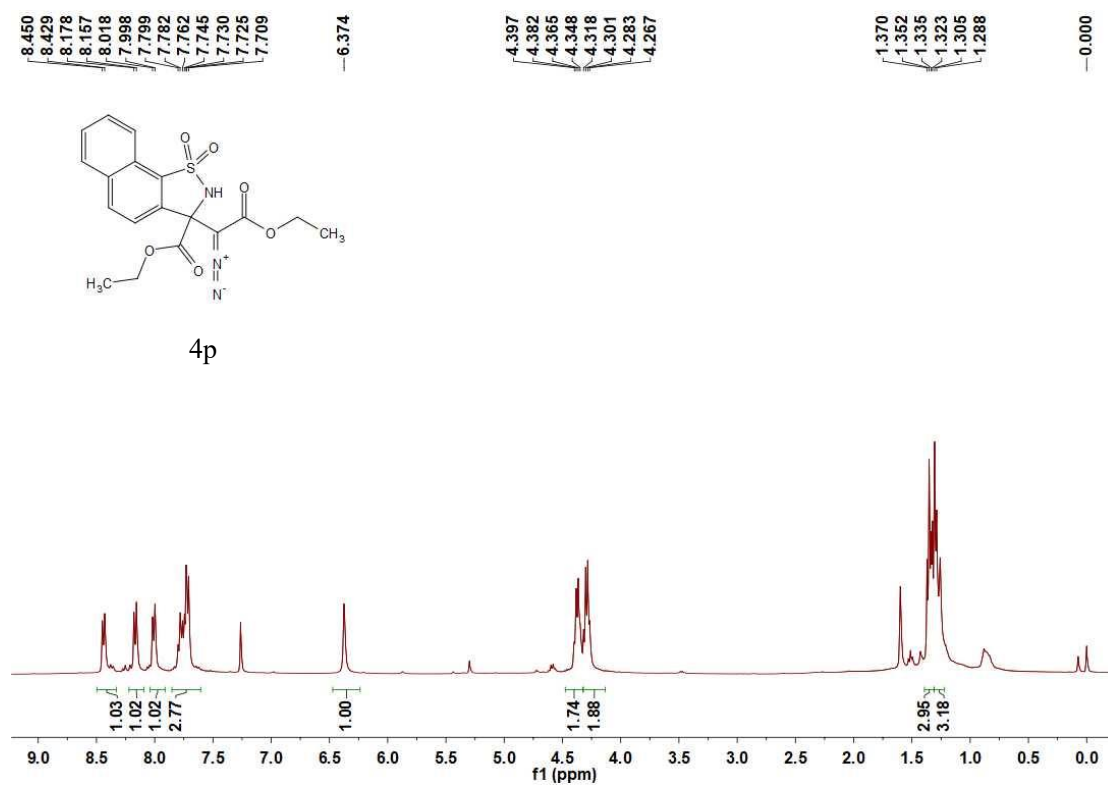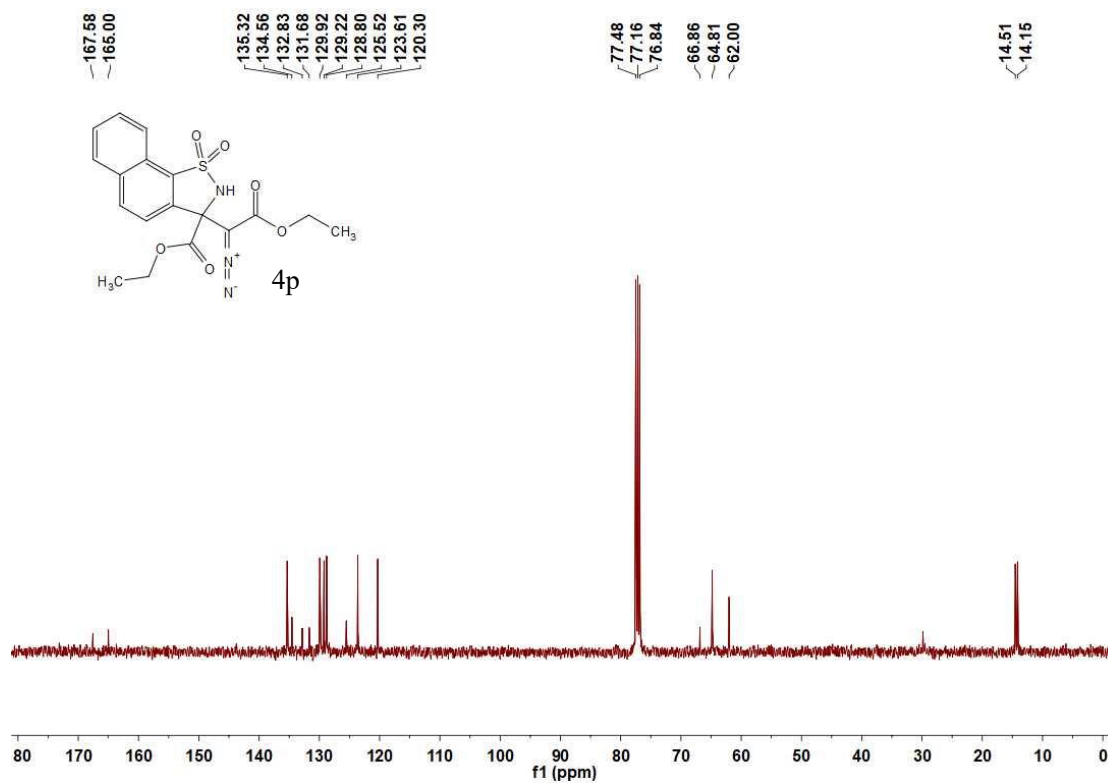

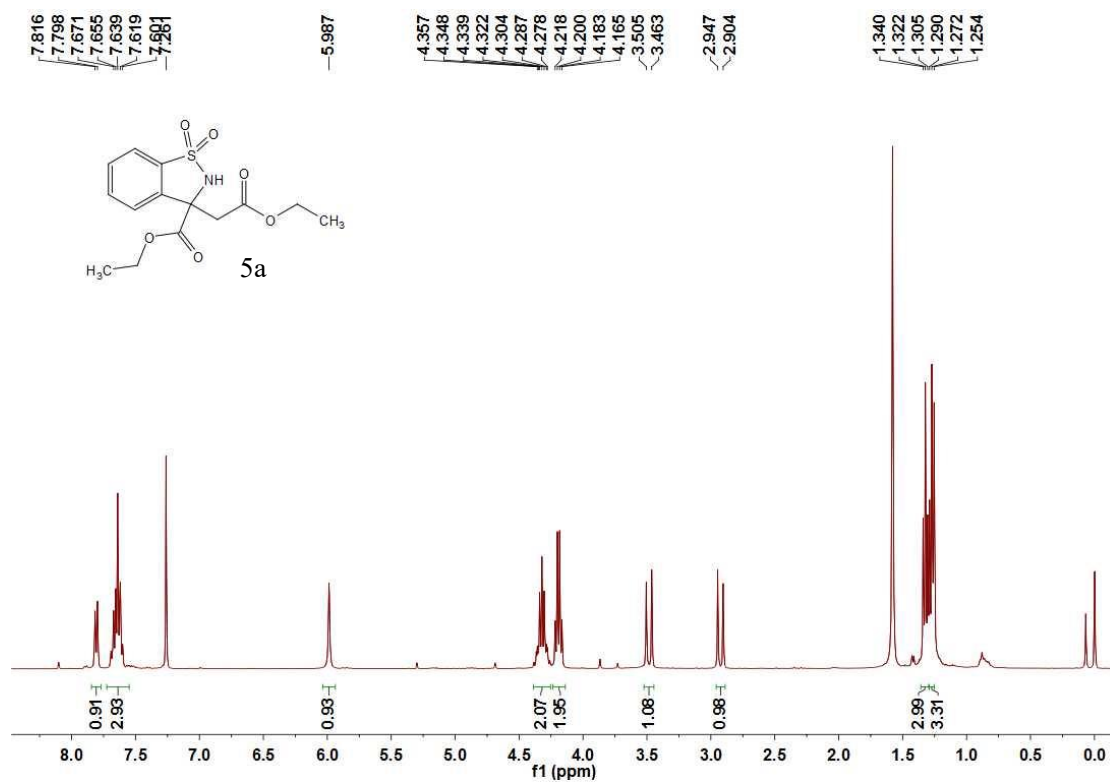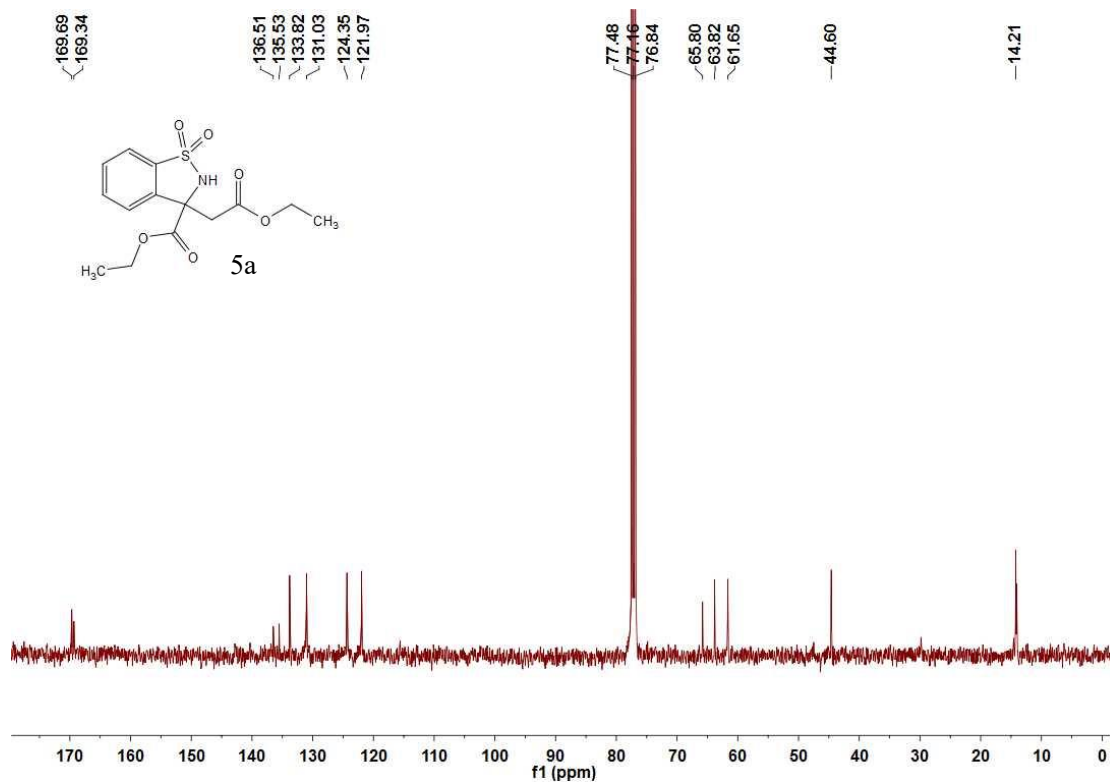

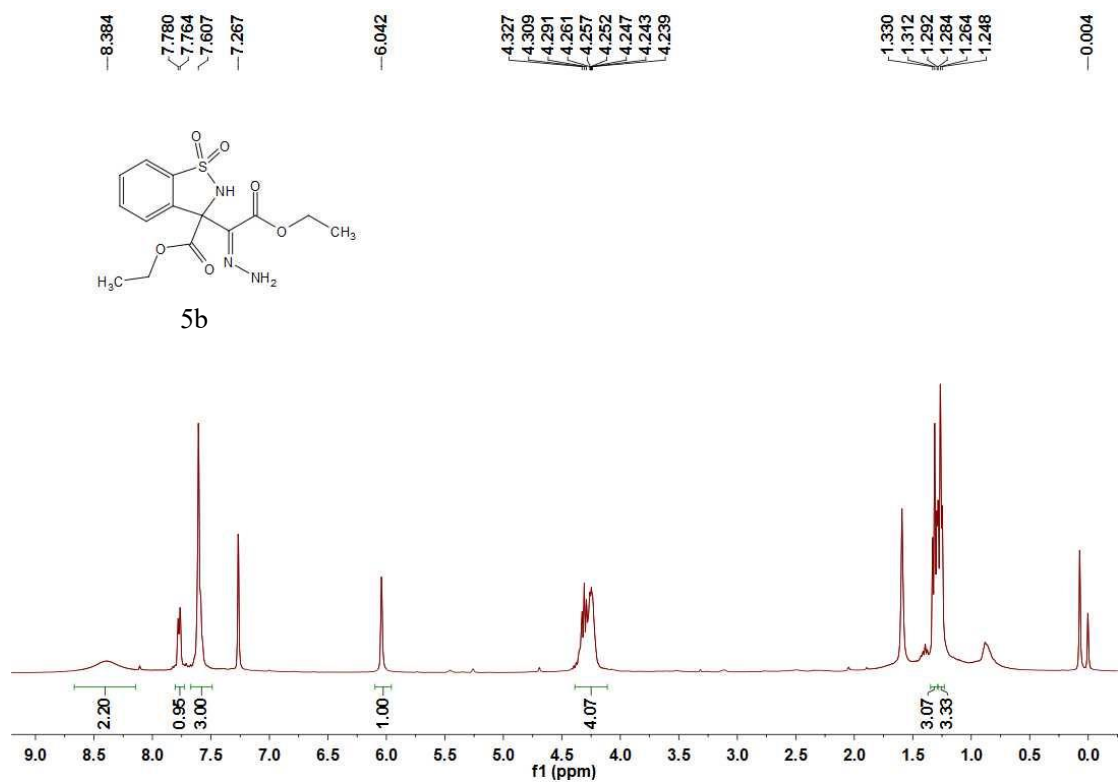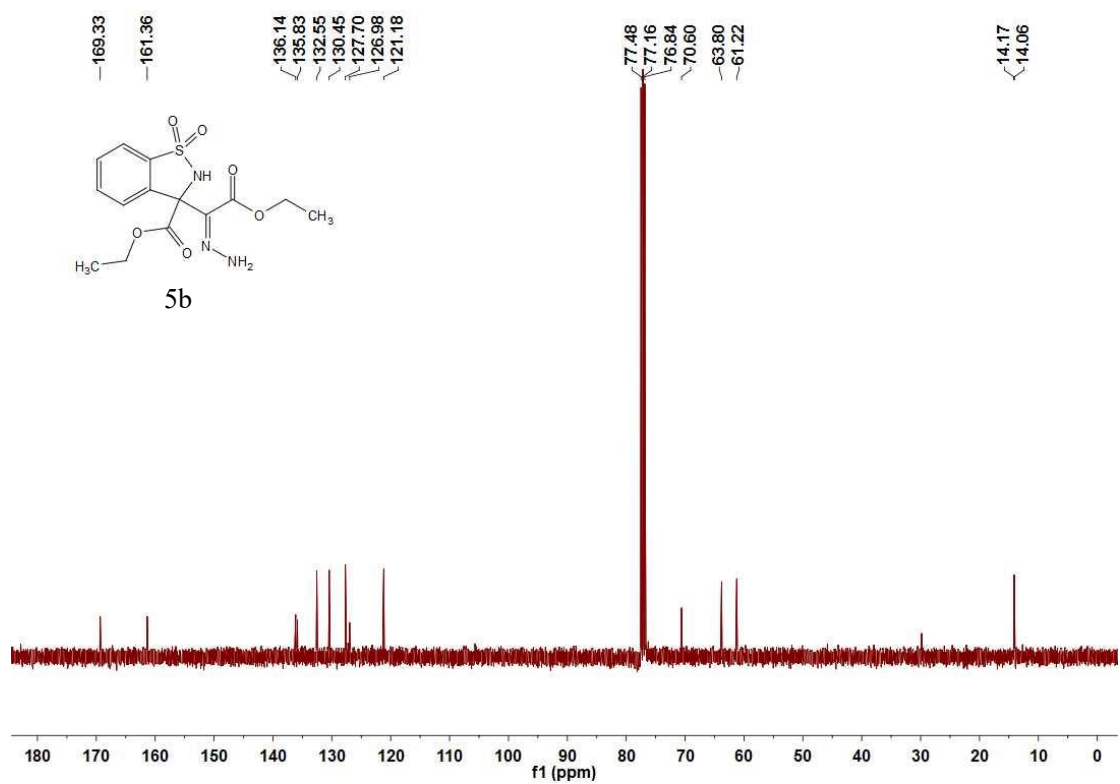

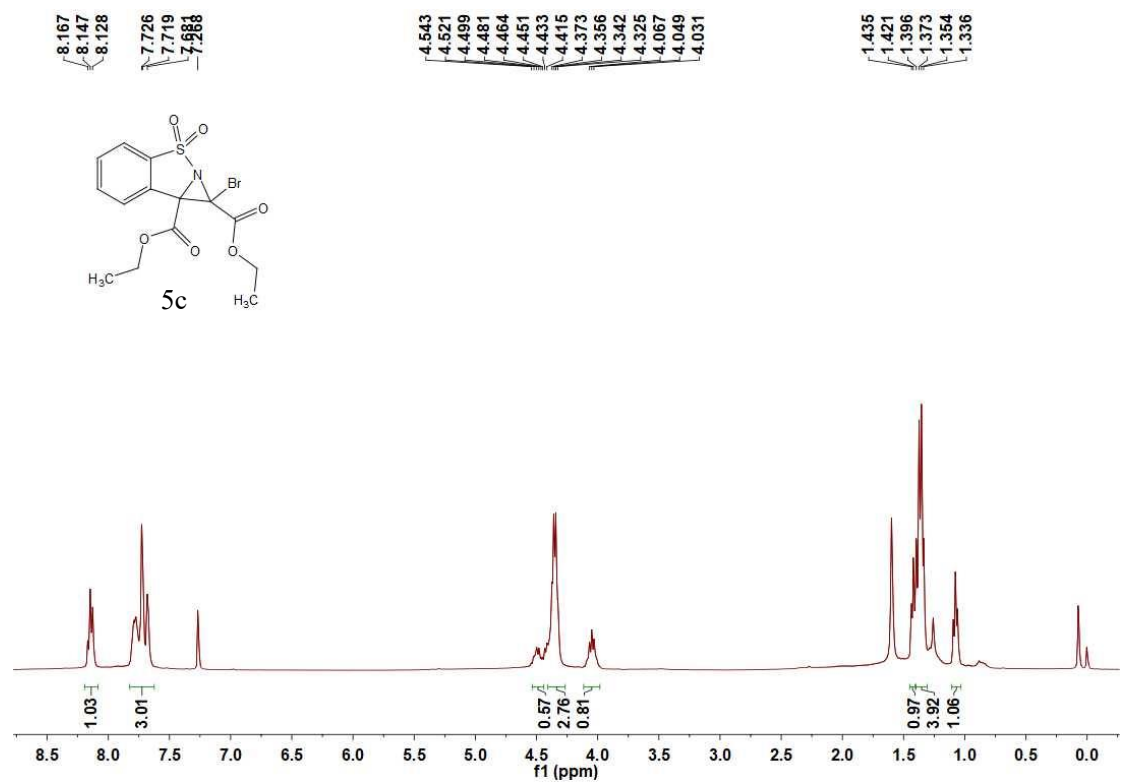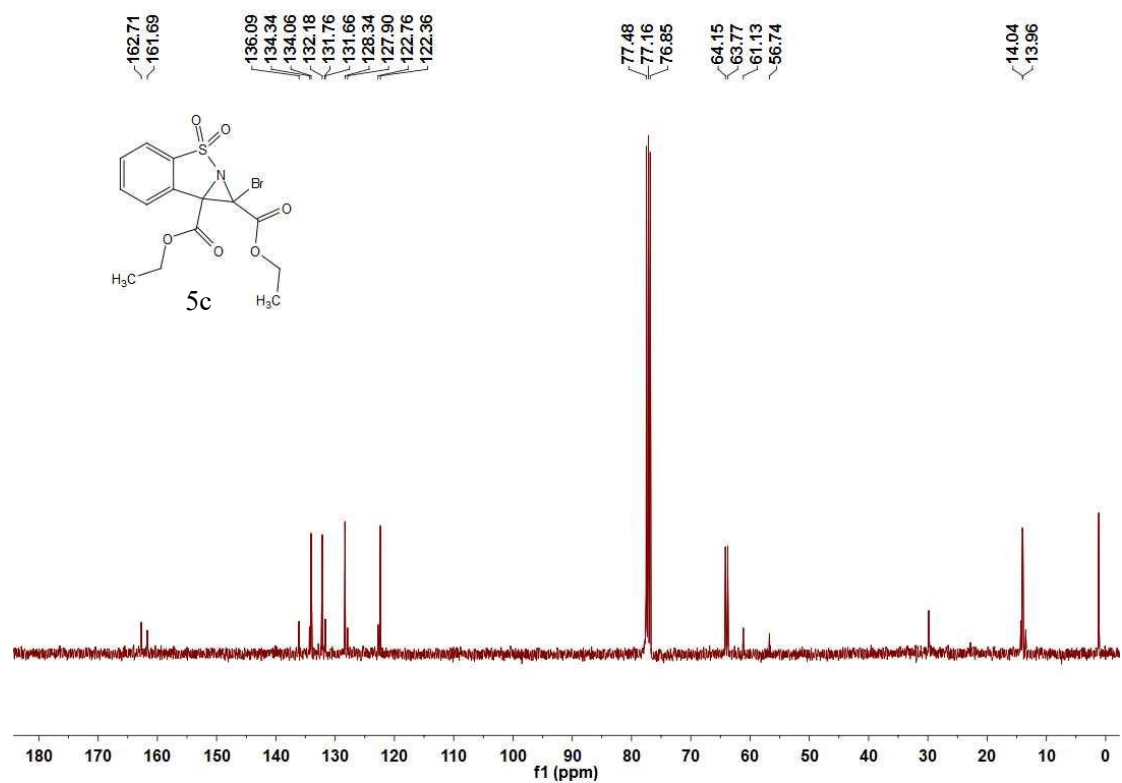



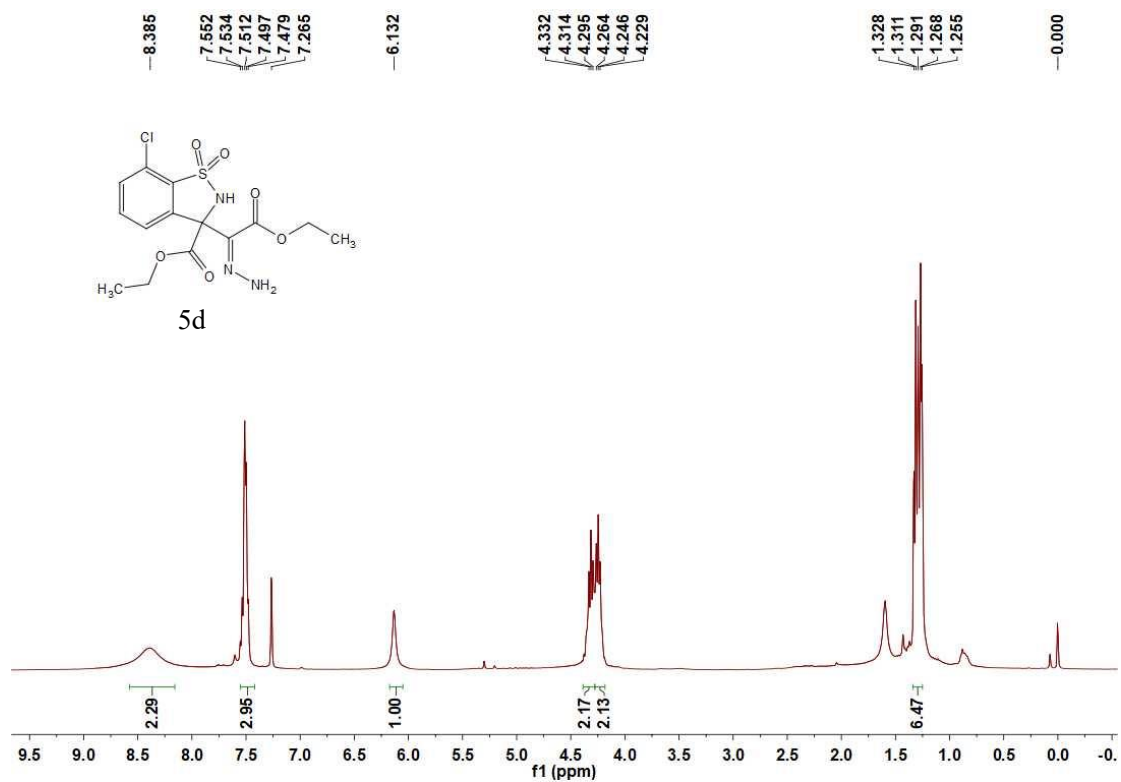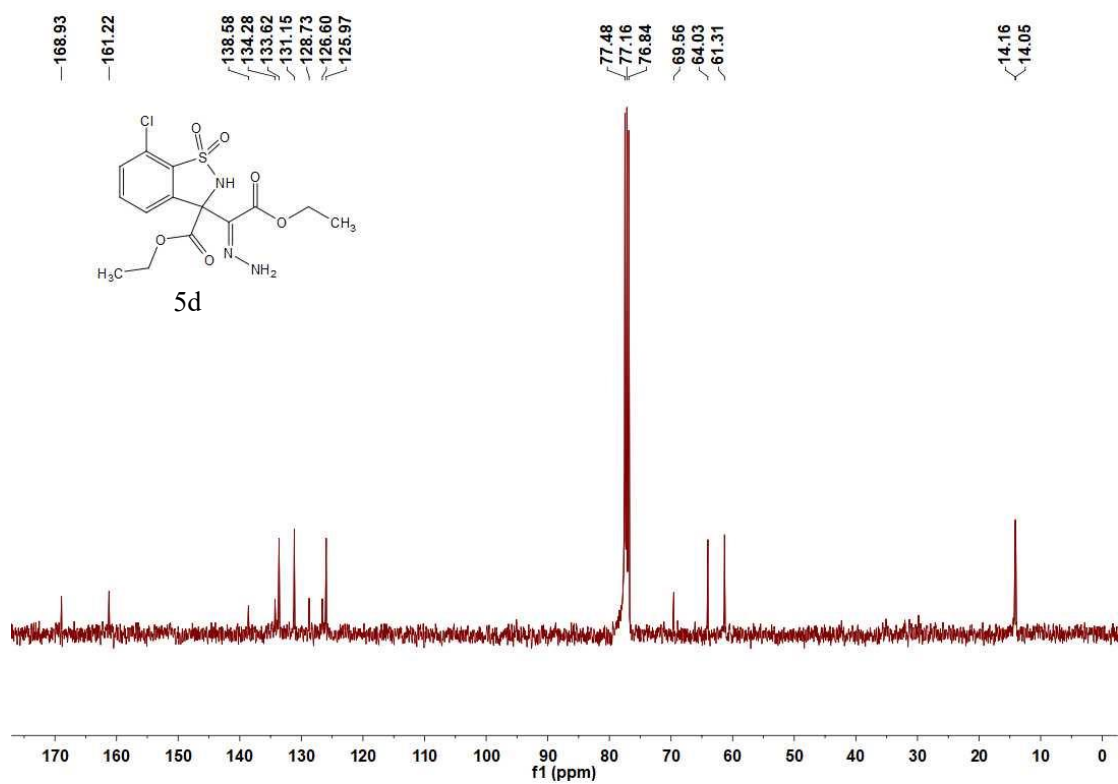

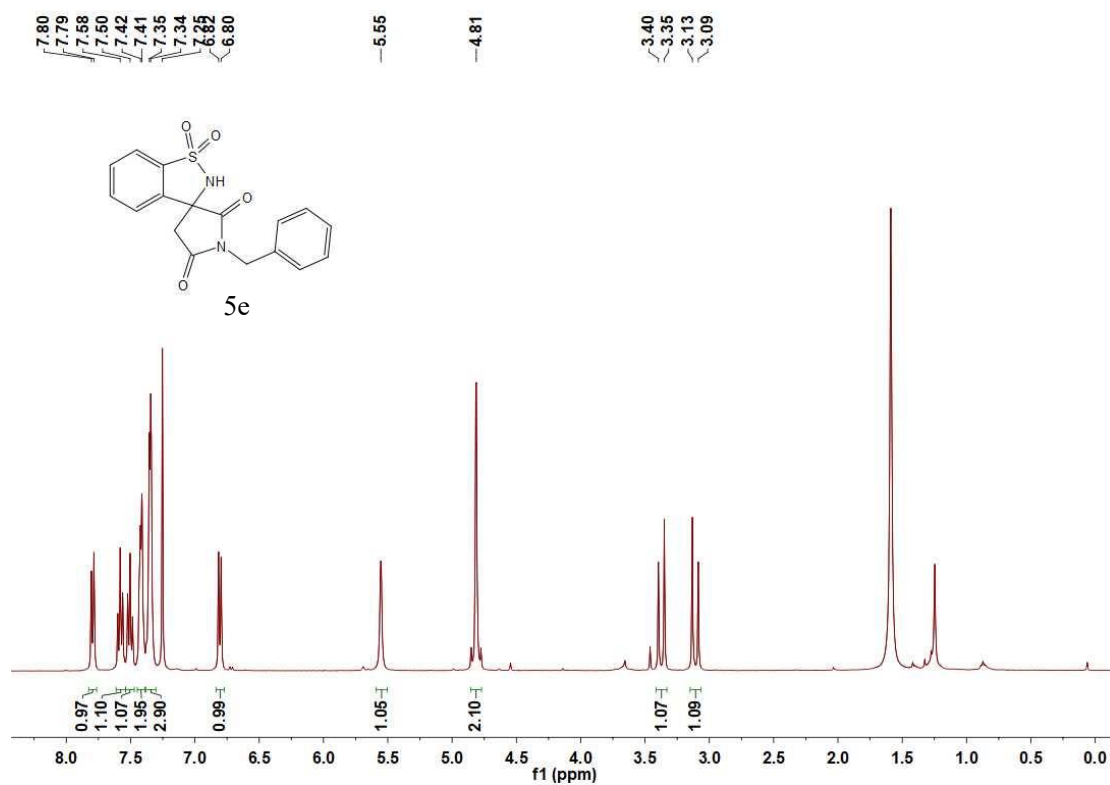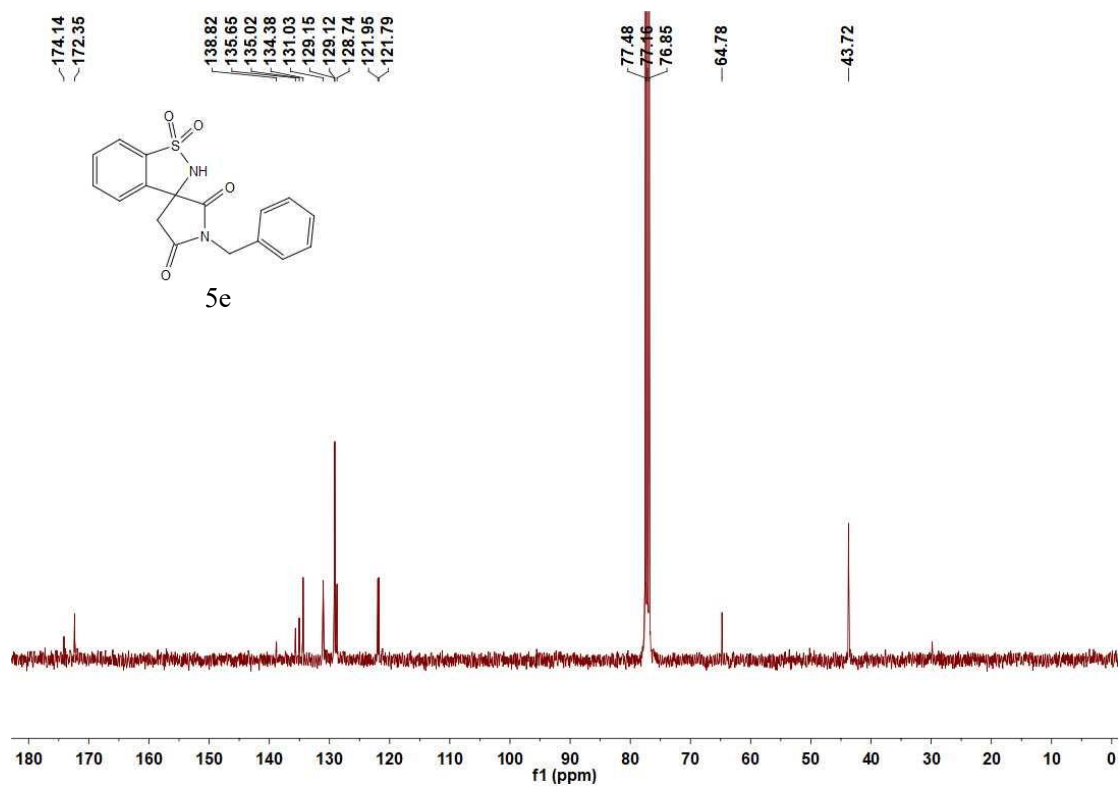

Supplement: c8ob00577j2.pdf [file c8ob00577j2.pdf]
